# Supplementary material for: Increasing saturation: development of broadly applicable photocatalytic Csp2–Csp3 cross-couplings of alkyl trifluoroborates and (hetero)aryl bromides for array synthesis
Source: Royal Society of Chemistry journal article supplement (doi:10.1039/d1re00192b), 2021-01-01
Supplement: d1re00192b1.pdf [file d1re00192b1.pdf]

### Supporting Information for:

#### *Increasing Saturation: Development of Broadly Applicable Photocatalytic C<sub>sp2</sub>-C<sub>sp3</sub> Cross-Couplings of Alkyl Trifluoroborates and (Hetero)Aryl Bromides for Array Synthesis*

*Anthony N. Cauley,<sup>†‡</sup> Melda Sezen-Edmonds,<sup>†</sup> Eric M. Simmons,<sup>\*†</sup> Cullen L. Cavallaro<sup>\*‡</sup>*

*<sup>†</sup>Chemical Process Development, Bristol Myers Squibb Company, One Squibb Drive, New Brunswick, New Jersey, 08903, United States*

*<sup>‡</sup>Small Molecule Drug Discovery, Bristol Myers Squibb Company, Route 206 and Provinceline Road, Princeton, New Jersey, 08540, United States*

### Table of Contents

|                                                                    |    |
|--------------------------------------------------------------------|----|
| Reaction Guide .....                                               | 2  |
| Additional References .....                                        | 5  |
| Abbreviations.....                                                 | 6  |
| General Information.....                                           | 6  |
| Supplementary HTE Data.....                                        | 9  |
| UV-Vis and Irradiance Measurements .....                           | 16 |
| Robustness Study of Ni/photoredox Organoboron Cross-coupling ..... | 18 |
| Flow Chemistry .....                                               | 20 |
| Chemical Libraries Synthesis .....                                 | 21 |
| Characterization Data for Chemical Library Compounds .....         | 24 |
| Spectral Data.....                                                 | 35 |
| References for the Supplemental Information .....                  | 75 |

## Reaction Guide

The following Data Guide was constructed based on observations and the data reported in the manuscript. Reaction parameters and substrate features are listed separately and contain references to the main text where appropriate. The notes have a particular focus on library synthesis; however, these recommendations can also be applied to single reactions. The Data Guide is intended to be a concise, digestible account of the work and should allow for wider adoption of this methodology in the medicinal chemistry community, specifically in a high-throughput setting.

| Reaction Parameters                    |                                                                                                                                                                                                                                                                           |                                                                                                                   |                                                                                                                                                                                                                                                                                                                                                                                                                                                                                                        |
|----------------------------------------|---------------------------------------------------------------------------------------------------------------------------------------------------------------------------------------------------------------------------------------------------------------------------|-------------------------------------------------------------------------------------------------------------------|--------------------------------------------------------------------------------------------------------------------------------------------------------------------------------------------------------------------------------------------------------------------------------------------------------------------------------------------------------------------------------------------------------------------------------------------------------------------------------------------------------|
| Component                              | Preferred                                                                                                                                                                                                                                                                 | Acceptable                                                                                                        | Not Compatible                                                                                                                                                                                                                                                                                                                                                                                                                                                                                         |
| <i>Ni Catalyst</i><br>(see Figure 1)   | Ni(dtbbpy)Br <sub>2</sub> (preformed)<br>Ni(NO <sub>3</sub> ) <sub>2</sub> ·6H <sub>2</sub> O<br>NiCl <sub>2</sub> ·6H <sub>2</sub> O<br>NiBr <sub>2</sub> ·3H <sub>2</sub> O                                                                                             | NiI <sub>2</sub> ·xH <sub>2</sub> O<br>Ni(OAc) <sub>2</sub> ·4H <sub>2</sub> O                                    | Ni(acac) <sub>2</sub>                                                                                                                                                                                                                                                                                                                                                                                                                                                                                  |
| <i>Photocatalyst</i><br>(see Figure 2) | <b>[Ir(dF(CF<sub>3</sub>)ppy)<sub>2</sub>(bpy)]PF<sub>6</sub> (PC1)</b><br><b>4CzIPN (PC2)</b><br>[Ir(dF(CF <sub>3</sub> )ppy) <sub>2</sub> (dtbbpy)]PF <sub>6</sub><br>[Ir(dF(Me)ppy) <sub>2</sub> (dtbbpy)]PF <sub>6</sub><br><b>Ir(p-F(t-Bu)ppy)<sub>3</sub> (PC3)</b> | Ir(dF(t-Bu)ppy) <sub>3</sub><br>Ir(dFppy) <sub>3</sub><br><b>[9Mes-NPh-Me<sub>2</sub>Acr]BF<sub>4</sub> (PC4)</b> | Ir(ppy) <sub>3</sub><br>[Ir(ppy) <sub>2</sub> (dtbbpy)]PF <sub>6</sub><br>[Ru(bpy) <sub>3</sub> ](PF <sub>6</sub> ) <sub>2</sub><br>[Ru(phen) <sub>3</sub> ](Cl) <sub>2</sub> ·xH <sub>2</sub> O<br>[Ru(bpz) <sub>3</sub> ](PF <sub>6</sub> ) <sub>2</sub><br>[Ru(DIP) <sub>3</sub> ](Cl) <sub>2</sub><br>[9Mes-NPh-Acr]BF <sub>4</sub><br>[9Mes-NMe-Acr]BF <sub>4</sub><br>Eosin Y<br>Eosin B<br>Fluorescein<br>[Ph <sub>3</sub> Pyryl]BF <sub>4</sub><br>Rose Bengal<br>Benzophenone<br>Rhodamine 6G |
| <i>Solvent</i> (see Figures 3 & 4)     | Dioxane<br>THF<br>CPME<br>95:5 Dioxane/ <i>t</i> -AmOH<br>80:20 Dioxane/DMAc<br>95:5 Dioxane/MeOH                                                                                                                                                                         | <i>t</i> -AmOH<br>DMAc<br>NMP<br>MeOH<br>MEK<br>95:5 MEK/MeOH<br>MeCN<br>DMPU<br>DMF                              | DMSO                                                                                                                                                                                                                                                                                                                                                                                                                                                                                                   |
| <i>Base</i> (see Figures 3 & 4)        | 2,6-Lutidine<br>Cs <sub>2</sub> CO <sub>3</sub>                                                                                                                                                                                                                           | Pyridine<br>2,4,6-Collidine<br>K <sub>2</sub> HPO <sub>4</sub>                                                    | Morpholine<br>DABCO<br>DMAP<br>TEA<br>PMP<br>DBU<br>DBN<br>TMG                                                                                                                                                                                                                                                                                                                                                                                                                                         |
| <i>Light Source</i>                    | Blue (470 nm)                                                                                                                                                                                                                                                             | White (broad)                                                                                                     |                                                                                                                                                                                                                                                                                                                                                                                                                                                                                                        |

|                                                     |                                                                                                                                                                                                                                                                                                                                                                                                                                                                                                                                                                                                                                                        |                                                                                                                                                                                                                                |                                                                                                                                             |
|-----------------------------------------------------|--------------------------------------------------------------------------------------------------------------------------------------------------------------------------------------------------------------------------------------------------------------------------------------------------------------------------------------------------------------------------------------------------------------------------------------------------------------------------------------------------------------------------------------------------------------------------------------------------------------------------------------------------------|--------------------------------------------------------------------------------------------------------------------------------------------------------------------------------------------------------------------------------|---------------------------------------------------------------------------------------------------------------------------------------------|
| (see Figure S2)                                     | Purple (400-415 nm)                                                                                                                                                                                                                                                                                                                                                                                                                                                                                                                                                                                                                                    |                                                                                                                                                                                                                                |                                                                                                                                             |
| <b>Notes</b>                                        |                                                                                                                                                                                                                                                                                                                                                                                                                                                                                                                                                                                                                                                        |                                                                                                                                                                                                                                |                                                                                                                                             |
| <i>Ni Catalyst</i>                                  | <ul style="list-style-type: none"> <li>• The active catalyst is formed <i>in situ</i> with dtbbpy as the ligand</li> <li>• Pre-formed Ni(dtbbpy)Br<sub>2</sub> is preferred for library synthesis</li> <li>• For libraries, the pre-formed Ni catalyst has good solubility in THF and the small amount as co-solvent will not affect the reaction</li> <li>• A Ni catalyst loading of 3 mol % is ideal</li> </ul>                                                                                                                                                                                                                                      |                                                                                                                                                                                                                                |                                                                                                                                             |
| <i>Photocatalyst</i>                                | <ul style="list-style-type: none"> <li>• Generally, the preferred photocatalysts have good solubility in MeCN</li> <li>• For libraries, the small percentage of MeCN as a co-solvent should not affect the reaction outcome</li> <li>• The photocatalyst loading should stay around 2 mol % to give the best light penetration</li> </ul>                                                                                                                                                                                                                                                                                                              |                                                                                                                                                                                                                                |                                                                                                                                             |
| <i>Solvent</i>                                      | <ul style="list-style-type: none"> <li>• The reaction tolerates a wide variety of solvents, however, avoid DMSO as the major solvent</li> <li>• Reaction concentration should be ~0.05 M – increasing the concentration limits the trifluoroborate solubility and decreases light penetration</li> <li>• Vigorous stirring (750 RPM+) is required to achieve homogeneous distribution of the reaction components</li> </ul>                                                                                                                                                                                                                            |                                                                                                                                                                                                                                |                                                                                                                                             |
| <i>Base</i>                                         | <ul style="list-style-type: none"> <li>• Increasing the equivalents of base (especially if increasing the equivalents of trifluoroborate) can often be beneficial</li> </ul>                                                                                                                                                                                                                                                                                                                                                                                                                                                                           |                                                                                                                                                                                                                                |                                                                                                                                             |
| <i>Light Source</i>                                 | <ul style="list-style-type: none"> <li>• Light source compatibility is based on the light sources used in this study with the intensities listed in Table S8 and “General Photoreactor Setup” (<i>vide infra</i>)</li> <li>• Purple LEDs (415 nm) give the highest P/IS ratios – the wavelength overlaps well with the photocatalyst absorbance, giving faster reactions rates and completed reactions in ~24 hours</li> <li>• Blue LEDs (470 nm) are comparable but can require extended reactions times (40+ hours) to achieve full conversion</li> <li>• White light (CFL bulb) has no advantages over the other light sources available</li> </ul> |                                                                                                                                                                                                                                |                                                                                                                                             |
| <b>Substrates</b>                                   |                                                                                                                                                                                                                                                                                                                                                                                                                                                                                                                                                                                                                                                        |                                                                                                                                                                                                                                |                                                                                                                                             |
| <b>Component</b>                                    | <b>High Conversion</b>                                                                                                                                                                                                                                                                                                                                                                                                                                                                                                                                                                                                                                 | <b>Acceptable Conversion</b>                                                                                                                                                                                                   | <b>Low to No Conversion</b>                                                                                                                 |
| <i>Alkyl Trifluoroborate</i><br>(see Figures 5 & 7) | Benzyl ( <b>1a</b> )<br>Isopropyl ( <b>1c</b> )<br>Cyclohexyl ( <b>1f</b> )<br>Tetrahydropyran-4-yl ( <b>1i</b> )<br>2-(Trimethylsilyl)ethoxymethyl ( <b>1j</b> )<br>Benzyloxymethyl ( <b>1k</b> )<br>4-Fluorobenzyl ( <b>1n</b> )<br>4-Methoxybenzyloxymethyl ( <b>1o</b> )<br>Methoxymethyl ( <b>1p</b> )<br>Isopropoxymethyl ( <b>1q</b> )<br>1-Boc-pyrrolidin-2-yl ( <b>1u</b> )                                                                                                                                                                                                                                                                   | 1-Boc-piperidin-4-yl ( <b>1b</b> )<br>Cyclobutyl ( <b>1g</b> )<br><i>tert</i> -Butoxymethyl ( <b>1l</b> )<br>Cyclopentyl ( <b>1e</b> )<br><i>sec</i> -Butyl ( <b>1m</b> )<br>4-(Tetrahydropyranyl methoxy)methyl ( <b>1r</b> ) | Cyclopropyl ( <b>1d</b> )<br><i>tert</i> -Butyl ( <b>1h</b> )<br>Acetoxymethyl ( <b>1t</b> )<br>2-(Dimethylamino)ethoxymethyl ( <b>1s</b> ) |
| <i>Aryl Halide</i><br>(see Figure 6)                | Electron neutral arenes<br>Electron deficient arenes                                                                                                                                                                                                                                                                                                                                                                                                                                                                                                                                                                                                   | Electron rich arenes                                                                                                                                                                                                           | Certain basic heteroarenes                                                                                                                  |
| <i>Functional Groups</i> (see Figures 6 & 7;        | Nitrile<br>Trifluoromethyl<br>Boc-protected amine                                                                                                                                                                                                                                                                                                                                                                                                                                                                                                                                                                                                      | Terminal alkyne<br>Aliphatic alcohol                                                                                                                                                                                           | Terminal alkene<br>Tertiary anilide<br>Primary aryl amine                                                                                   |

|                                                     |                                                                                                                                                                                                                                                                                                                                                                                                                      |                                                      |                                                                                                                                             |
|-----------------------------------------------------|----------------------------------------------------------------------------------------------------------------------------------------------------------------------------------------------------------------------------------------------------------------------------------------------------------------------------------------------------------------------------------------------------------------------|------------------------------------------------------|---------------------------------------------------------------------------------------------------------------------------------------------|
| Table 1)                                            | Chloro<br>Methyl ester<br>Methyl<br>Methoxy<br>Alkyl chloride<br>Ketone<br>Internal alkyne<br>Phenol<br>Aromatic aldehyde                                                                                                                                                                                                                                                                                            |                                                      |                                                                                                                                             |
| <i>Heterocycles</i><br>(see Figures 6 & 7; Table 1) | Pyridine<br>Quinoline<br>Isoquinoline<br>2-Butylthiophene<br>Benzofuran<br>Benzo[d]thiazole<br>4-Methylthiazole<br>4H-Chromen-4-one                                                                                                                                                                                                                                                                                  | Indole<br><i>N</i> -Benzylpyrrole<br>Benzo[d]oxazole | Unprotected pyrazole<br><i>N</i> -Pivaloylpyrrole<br>2-Chloropyrimidine<br>1-Methyl-1H-imidazole<br>1-Methyl-1H-indole<br>2-Chloroquinoline |
| <b>Notes</b>                                        |                                                                                                                                                                                                                                                                                                                                                                                                                      |                                                      |                                                                                                                                             |
| <i>Alkyl Trifluoroborate</i>                        | <ul style="list-style-type: none"> <li>• For best results, use 2.0 or more equiv of trifluoroborate</li> </ul>                                                                                                                                                                                                                                                                                                       |                                                      |                                                                                                                                             |
| <i>Aryl Halide</i>                                  | <ul style="list-style-type: none"> <li>• Aryl bromides provide the highest RAP of product</li> <li>• For library reaction setup, if the aryl halide core has poor solubility, weighing individually into each reaction vessel or dosing as an adequately suspended slurry may be necessary – in this case, the base should be added individually to each reaction instead of adding to the stock solution</li> </ul> |                                                      |                                                                                                                                             |
| <i>Functional Groups</i>                            | <ul style="list-style-type: none"> <li>• Functional group compatibility was determined from considering both the substrate scope and robustness study; substrate analysis on a case-to-case basis can be extrapolated from the data provided</li> </ul>                                                                                                                                                              |                                                      |                                                                                                                                             |
| <i>Heterocycles</i>                                 | <ul style="list-style-type: none"> <li>• Heterocycle compatibility was determined from considering both the substrate scope and robustness study; substrate analysis on a case-to-case basis can be extrapolated from the data provided</li> </ul>                                                                                                                                                                   |                                                      |                                                                                                                                             |

## Additional References

These references are provided to supplement those in the main body of the manuscript with reference numbers in parentheses corresponding to those included there.

- (3) F. Lovering, *Med. Chem. Commun.*, 2013, **4**, 515-519.
- (5) D. M. Schultz and T. P. Yoon, *Science*, 2014, **343**, 1239176.
- (5) N. A. Romero and D. A. Nicewicz, *Chem. Rev.*, 2016, **116**, 10075-10166.
- (6) Z. Zuo, D. T. Ahneman, L. Chu, J. A. Terrett, A. G. Doyle and D. W. MacMillan, *Science*, 2014, **345**, 437-440.
- (6) X. Zhang and D. W. C. MacMillan, *J. Am. Chem. Soc.*, 2016, **138**, 13862-13865.
- (6) V. Corce, L. M. Chamoreau, E. Derat, J. P. Goddard, C. Ollivier and L. Fensterbank, *Angew. Chem., Int. Ed.*, 2015, **54**, 11414-11418.
- (6) P. Zhang, C. C. Le and D. W. MacMillan, *J. Am. Chem. Soc.*, 2016, **138**, 8084-8087.
- (15) J. R. Schmink, A. Bellomo and S. Berritt, *Aldrichimica Acta*, 2013, **46**, 71-80.
- (15) J. A. Selekman, J. Qiu, K. Tran, J. Stevens, V. Rosso, E. Simmons, Y. Xiao and J. Janey, *Annu. Rev. Chem. Biomol.*, 2017, **8**, 525-547.
- (15) M. Shevlin, *ACS Med. Chem. Lett.*, 2017, **8**, 601-607.
- (15) S. W. Krska, D. A. DiRocco, S. D. Dreher and M. Shevlin, *Acc. Chem. Res.*, 2017, **50**, 2976-2985.
- (29) M. N. Hopkinson, A. Gomez-Suarez, M. Teders, B. Sahoo and F. Glorius, *Angew. Chem. Int. Ed.*, 2016, **55**, 4361-4366.
- (33) C. L. Cavallaro, S. Briceno, J. Chen, M. E. Cvijic, P. Davies, J. Hynes, Jr., R. Q. Liu, S. Mandlekar, A. V. Rose, A. J. Tebben, K. Van Kirk, A. Watson, H. Wu, G. Yang and P. H. Carter, *J. Med. Chem.*, 2012, **55**, 9643-9653.
- (33) X. Wu and P. G. Schultz, *J. Am. Chem. Soc.*, 2009, **131**, 12497-12515.
- (33) T. Kodadek, *Chem. Commun.*, 2011, **47**, 9757-9763.
- (35) J. W. Tucker, Y. Zhang, T. F. Jamison and C. R. Stephenson, *Angew. Chem., Int. Ed.*, 2012, **51**, 4144-4147.
- (35) Y. Su, N. J. Straathof, V. Hessel and T. Noel, *Chemistry*, 2014, **20**, 10562-10589.

## Abbreviations

96WP, 96-well plate; CFL, compact fluorescent light bulb; CPME, cyclopentyl methyl ether; DABCO, 1,4-diazabicyclo[2.2.2]octane; DBN, 1,5-diazabicyclo[4.3.0]non-5-ene; DBU, 1,8-diazabicycloundec-7-ene; DMAc, *N,N*-dimethylacetamide; DMAP, *N,N*-dimethylaminopyridine; DMF, *N,N*-dimethylformamide; DMPU, *N,N'*-dimethylpropyleneurea; DMSO, dimethyl sulfoxide; GC/FID, gas chromatography with flame-ionization detection; HTE, high-throughput experimentation; LED, light-emitting diode; MeCN, acetonitrile; MEK, methyl ethyl ketone or 2-butanone; MeOH, methanol; NMP, *N*-methylpyrrolidinone; PMP, 1,2,2,6,6-pentamethylpiperidine; RAP, UHPLC-MS relative area percent; SAR, structure-activity relationships; *t*-AmOH, *tert*-amyl alcohol or 2-methyl-2-butanol; TEA, trimethylamine; THF, tetrahydrofuran; TMG, 1,1,3,3-tetramethylguanidine; UHPLC-MS, ultra high performance liquid chromatography-mass spectrometry.

## General Information

All reagents and catalysts were used as received from commercial sources. The preformed Ni(dtbbpy)Br<sub>2</sub> complex was prepared using literature procedures.<sup>1</sup> Potassium alkyl trifluoroborate salts were purchased from Combi-Blocks (**1a**, **1c**, **1d**, **1e**, **1f**, **1g**, **1h**, **1i**, **1j**, **1k**, **1l**, **1n**, **1o**, **1p**, **1q**, **1r**, **1s**, **1t**, **1u**), Frontier Scientific Services (**1b**), or Sigma-Aldrich (**1m**).

### *Ni Precatalyst Cost Information*<sup>2</sup>

| Name                                                 | CAS        | MW     | Vendor       | Part No. | Quantity (g) | Cost (\$) | Cost (\$/g) | Cost (\$/kg) | Cost (\$/mol) |
|------------------------------------------------------|------------|--------|--------------|----------|--------------|-----------|-------------|--------------|---------------|
| Ni(COD) <sub>2</sub>                                 | 1295-35-8  | 275.06 | Strem        | 28-0010  | 10           | \$298     | \$29.80     | \$29,800     | \$8,197       |
| NiCl <sub>2</sub> ·DME                               | 29046-78-4 | 219.72 | AmBeed       | A875498  | 25           | \$223     | \$8.92      | \$8,920      | \$1,960       |
| Ni(NO <sub>3</sub> ) <sub>2</sub> ·6H <sub>2</sub> O | 13478-00-7 | 290.79 | Chem-Impex   | 24615    | 5,000        | \$224     | \$0.04      | \$45         | \$13          |
| NiCl <sub>2</sub> ·6H <sub>2</sub> O                 | 7791-20-0  | 237.69 | Chem-Impex   | 01459    | 25,000       | \$1,848   | \$0.07      | \$74         | \$18          |
| NiBr <sub>2</sub> ·3H <sub>2</sub> O                 | 7789-49-3  | 272.55 | Aldrich      | 72243    | 1,000        | \$467     | \$0.47      | \$467        | \$127         |
| NiI <sub>2</sub> ·xH <sub>2</sub> O                  | 7790-34-3  | 312.49 | Combi-Blocks | HG-3944  | 25           | \$195     | \$7.80      | \$7,800      | \$2,437       |
| Ni(OAc) <sub>2</sub> ·4H <sub>2</sub> O              | 6018-89-9  | 248.84 | Chem-Impex   | 30281    | 10,000       | \$830     | \$0.08      | \$88         | \$22          |
| Ni(acac) <sub>2</sub>                                | 3264-82-2  | 256.91 | Chem-Impex   | 26725    | 5,000        | \$1,596   | \$0.32      | \$319        | \$82          |

### *Equipment List*

Microscale reactions (HTE, Robustness Study) were carried out in a Para-dox photoredox 96-well plate (Analytical Sales and Services, Cat. No. 96973) irradiated by a Lumidox or Lumidox UV 96-well LED array (Analytical Sales and Services; violet – 415 nm, LUM96-415; blue – 470 nm, LUM96B; white – broad spectrum, LUM96W) and controlled with a Lumidox controller (Analytical Sales and Services, LUMCON; operated at 30 mA current for blue and white LED arrays) or Lumidox UV controller (Analytical Sales and Services, LUMCON-UV; operated at 20 mA current for violet LED array). Solvent was removed from microscale reactions using a Genevac HT-4X evaporator. Solutions were dosed into vials with a digital microdispenser (VWR; 20-100  $\mu$ L dispenser, 53506-201; 100  $\mu$ L capillaries, 53508-499). Microscale reaction stirring was done on a Freeslate CM3 automation system. Shimadzu LCMS-2020 mass spectrometer was used for UHPLC-MS analysis. Absorbance measurements were recorded with a Shimadzu UV-2600 and spectral irradiances were measured with a Black-Comet SR concave grating spectrometer (StellarNet). Gas chromatography for the Robustness additives was carried out with an Agilent 6890 Plus GC with Autosampler. Chemical libraries were irradiated with Toogod Flexible Light LED Strip (5 m – 16.4 ft. DC 12V 300 pcs.) in either UV Black (purple) or Blue. Solvent was removed from chemical library reactions with a Zymark TurboVap or Genevac HT-12. Analytical LC-MS for chemical libraries was carried out on a Shimadzu Nexera Series 30 UHPLC with LCMS-2020 and purification was done using a Shimadzu Preparative LC-8A or LC-20 with LCMS-2020. Proton NMR spectra were recorded on a Bruker Avance III 500 MHz instrument, and are referenced to residual, undeuterated solvents (DMSO- $d_6$ :  $\delta$  2.50). The following abbreviations are used to explain multiplicities: br = broad, s = singlet, d = doublet, t = triplet, m = multiplet. Flow photochemistry was conducted using a Vapourtec E series flow reactor (Part No. 50-1336) with UV-150 Photochemical Reactor (10 mL reactor coil, Part No. 50-1580) and standard high efficiency purple LEDs (420 nm, 18 W, Gen-1, Part No. 50-1445).

### *Safety Note*

The lamps used to promote photocatalysis produce light at wavelengths that are potentially harmful. Appropriate eyewear that blocks the wavelength of light used and appropriately colored gels or plastic shields (orange for the blue and purple wavelengths used in this work) between the light source and the chemist are recommended.

### *General Analytical Methods*

Microscale reactions (HTE, Robustness Study) and Flow Chemistry were analyzed by UHPLC-MS with detection by UV at 220 nm and low resolution mass spectrometry detection (positive ion mode). Injection conditions: Column: Waters Acquity BEH C8 1.7  $\mu$ m 2.1 x 50 mm; Injection Volume = 1.0  $\mu$ L; Mobile Phase A: 5:95 MeCN:H<sub>2</sub>O with 0.05% TFA; Mobile Phase B: 95:5 MeCN:H<sub>2</sub>O with 0.05% TFA; Temp. = 40 °C; Gradient: 0% B to 100% B over 2 min., then a 0.5 min. hold at 100% B; Flow: 1 mL/min.

Robustness additives were analyzed by GC with detection by FID at 320 °C. Injection Conditions: Inlet Temp. = 250 °C; Column: Restek Rti-624Sil MS 20 m x 0.18 mm x 1.0 µm; Injection Volume = 0.50 µL; Carrier Gas/Flow Rate: Helium at 1.4 mL/min. constant flow; Injection Mode: Split injection, 70:1 split ratio; Inlet Liner: Restek Topaz Low Pressure Drop Liner, deactivated with wool; Run Time = 20 min.; Oven Program: 50 °C/0.5 min., 20 °C/min., 300 °C/7 min.

Chemical Libraries were purified via preparative LC-MS with the following conditions: Column: XBridge C18, 200 mm x 19 mm, 5 µm particles; Injection Volume = 2 mL; Mobile Phase A: 5:95 MeCN:H<sub>2</sub>O with 10 mM ammonium acetate or 0.05% TFA; Mobile Phase B: 95:5 MeCN:H<sub>2</sub>O with 10 mM ammonium acetate or 0.05% TFA; Gradient: a 0 min. hold at 20% B, 20-60% B over 20 mins., then a 0 min. hold at 100% B; Flow Rate: 20 mL/min.; Column Temp. = 25 °C; Detection: UV (220 nm) and fraction collection was triggered by MS signal. Fractions containing the desired product were combined and dried using a Genevac evaporator. Analytical LC-MS was used to determine the final purity of the chemical library compounds. Injection conditions: **Method A:** Column: Waters XBridge C18, 2.1 mm x 50 mm, 1.7 µm particles; Injection Volume = 2.0 µL; Mobile Phase A: 5:95 MeCN:H<sub>2</sub>O with 10 mM ammonium acetate; Mobile Phase B: 95:5 MeCN:H<sub>2</sub>O with 10 mM ammonium acetate; Temp. = 50 °C; Gradient: 0% B to 100% B over 3 min., then a 0.5 min. hold at 100% B; Flow: 1 mL/min.; Detection: MS and UV (220 nm). **Method B:** Column: Waters XBridge C18, 2.1 mm x 50 mm, 1.7 µm particles; Injection Volume = 2.0 µL; Mobile Phase A: 5:95 MeCN:H<sub>2</sub>O with 0.1% TFA; Mobile Phase B: 95:5 MeCN:H<sub>2</sub>O with 0.1% TFA; Temp. = 50 °C; Gradient: 0% B to 100% B over 3 min., then a 0.5 min. hold at 100% B; Flow: 1 mL/min.; Detection: MS and UV (220 nm).



## Supplementary HTE Data

### General Procedure for High-throughput Experimentation

Microscale high-throughput experiments were carried out in a nitrogen-filled glovebox. To a Para-dox plate containing empty 1 mL vials (borosilicate glass, 8 x 30 mm OD) in each well was added a stock solution of photocatalyst (0.002 M in DCM or MeCN, 100  $\mu$ L, 2 mol %) and the solvent was removed using a Genevac evaporator. Stock solutions of Ni precatalyst (0.003 M in THF-inhibitor free, 3 mol %) and ligand (0.003 M in THF-inhibitor free, 3 mol %) were prepared and equal volumes of each solution were mixed and allowed to ligate for 20 min with gentle shaking. 100  $\mu$ L of the combined solution was added along with a stock solution of aryl bromide (if solid; liquid aryl bromides were added with reaction solvent at the end of the setup; 0.100 M in THF-inhibitor free, 100  $\mu$ L, 10  $\mu$ mol) and the solvent was removed. Next, a stock solution of potassium alkyl trifluoroborate (0.120 M in acetone, 100  $\mu$ L, 12  $\mu$ mol) was added and the solvent removed using a Genevac. After completely drying, microstir bars were added. Then, solid inorganic base was added with a digital microdispenser. Finally, stock solutions of reaction solvent (100  $\mu$ L) with liquid base (0.350 M) and in some cases, aryl bromide (0.100 M) were added to the appropriate wells. 100  $\mu$ L of solvent was added to wells with inorganic base. The plate was then sealed under N<sub>2</sub> with a sheet of perfluoroalkoxy (PFA) film, two rubber mats and a metal lid, and the contents were stirred (300 RPM tumble stirring) on a Freeslate CM3 automation system at 20 °C for 16 h. The reactions were irradiated with a Lumidox or Lumidox UV 96-well LED array controlled by Lumidox or Lumidox UV controller. After reaction completion, 200  $\mu$ L of a 2 mg/mL solution of 4,4'-dimethylbiphenyl in MeCN was added to the wells as internal standard (IS) and the mixture was further diluted with 50:50 MeCN:H<sub>2</sub>O (200  $\mu$ L). The contents were thoroughly mixed and an aliquot (25  $\mu$ L) was added to a 96-well filter plate (0.7  $\mu$ m PPE, Agilent 200937-100) and further diluted with 50:50 MeCN:H<sub>2</sub>O (500  $\mu$ L). The plate containing the filtered samples was then subject to UHPLC-MS analysis with results displayed as P/IS<sup>3</sup> or RAP.

**Table S1.** Ni(NO<sub>3</sub>)<sub>2</sub>•6H<sub>2</sub>O vs. Ni(COD)<sub>2</sub> for 23 photocatalyst and no photocatalyst control reaction.<sup>a</sup>

| Photocatalyst                                                      | Ni(COD) <sub>2</sub> | Ni(NO <sub>3</sub> ) <sub>2</sub> •6H <sub>2</sub> O |
|--------------------------------------------------------------------|----------------------|------------------------------------------------------|
| No Photocatalyst                                                   | 0.00                 | 0.00                                                 |
| Ir(ppy) <sub>3</sub>                                               | 0.07                 | 0.29                                                 |
| Ir(dFppy) <sub>3</sub>                                             | 0.42                 | 3.74                                                 |
| Ir(p-F(t-Bu)ppy) <sub>3</sub>                                      | 3.02                 | 4.71                                                 |
| Ir(dF(t-Bu)ppy) <sub>3</sub>                                       | 0.97                 | 3.26                                                 |
| [Ir(ppy) <sub>2</sub> (dtbbpy)]PF <sub>6</sub>                     | 1.34                 | 2.42                                                 |
| [Ir(dF(Me)ppy) <sub>2</sub> (dtbbpy)]PF <sub>6</sub>               | 4.00                 | 5.00                                                 |
| [Ir(dF(CF <sub>3</sub> )ppy) <sub>2</sub> (bpy)]PF <sub>6</sub>    | 3.59                 | 4.82                                                 |
| [Ir(dF(CF <sub>3</sub> )ppy) <sub>2</sub> (dtbbpy)]PF <sub>6</sub> | 4.95                 | 4.58                                                 |
| [Ru(bpy) <sub>3</sub> ](PF <sub>6</sub> ) <sub>2</sub>             | 0.08                 | 0.05                                                 |
| [Ru(phen) <sub>3</sub> ](Cl) <sub>2</sub> •xH <sub>2</sub> O       | 0.09                 | 0.07                                                 |
| [Ru(bpz) <sub>3</sub> ](PF <sub>6</sub> ) <sub>2</sub>             | 0.39                 | 0.83                                                 |
| [Ru(DIP) <sub>3</sub> ](Cl) <sub>2</sub>                           | 0.11                 | 0.07                                                 |

|                                               |      |      |
|-----------------------------------------------|------|------|
| [9Mes-NPh-Acr]BF <sub>4</sub>                 | 0.22 | 0.35 |
| [9Mes-NPh-Me <sub>2</sub> Acr]BF <sub>4</sub> | 0.96 | 1.66 |
| [9Mes-NMe-Acr]BF <sub>4</sub>                 | 0.46 | 0.86 |
| Eosin Y                                       | 0.11 | 0.07 |
| Eosin B                                       | 0.04 | 0.04 |
| Fluorescein                                   | 0.79 | 0.49 |
| [Ph <sub>3</sub> Pyryl]BF <sub>4</sub>        | 0.05 | 0.06 |
| 4CzIPN                                        | 2.69 | 4.63 |
| Rose Bengal                                   | 0.01 | 0.06 |
| Benzophenone                                  | 0.06 | 0.06 |
| Rhodamine 6G                                  | 0.30 | 0.31 |

<sup>a</sup>Reaction conditions: 5-bromoquinoline (**2**, 10 μmol) and potassium benzyltrifluoroborate (**1a**, 1.2 equiv) with 2 mol % [PC], 3 mol % [Ni], 3 mol % 4,4'-di-*tert*-butyl-2,2'-bipyridine (dtbbpy), 2,6-lutidine (3.5 equiv), and dioxane (0.1 M). Reactions were monitored by UHPLC-MS with results displayed as P/IS.

**Figure S1. Photoredox catalyst structures.**<sup>4</sup>

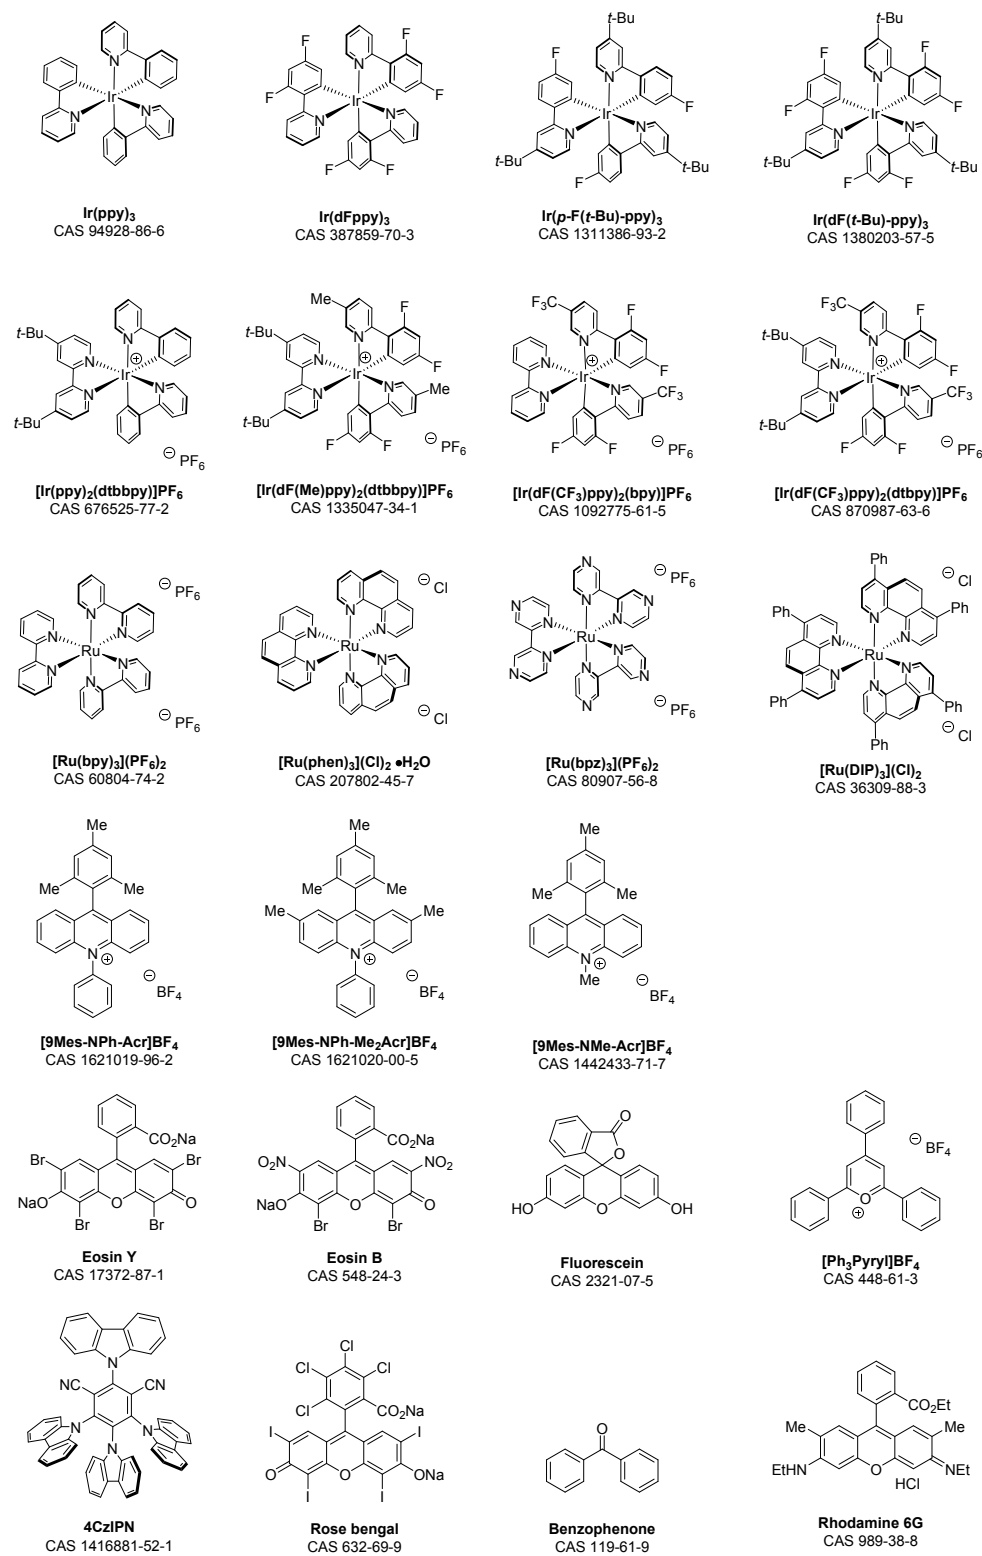

**Table S2.** Hydrated Ni(II) salts as Ni precatalysts with 4CzIPN as photocatalyst.<sup>a</sup>

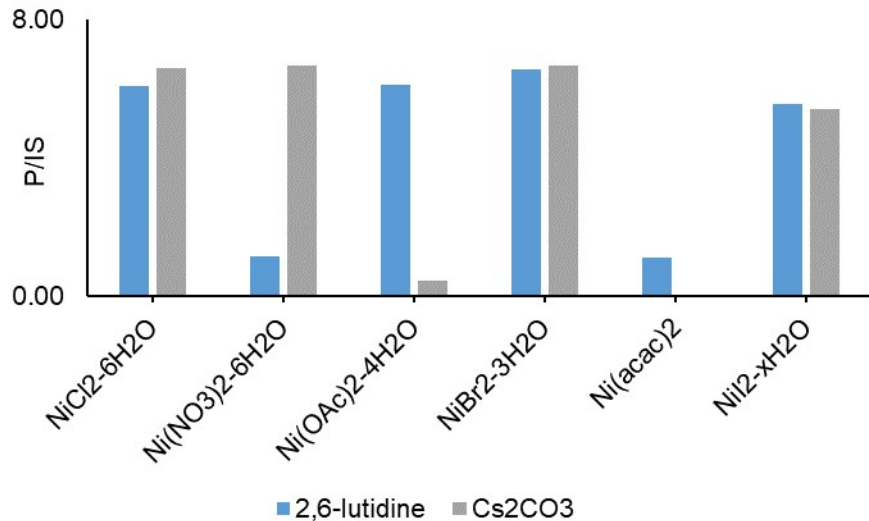

<sup>a</sup>Reaction conditions: **2** (10 μmol) and **1a** (1.2 equiv) with 2 mol % 4CzIPN, 3 mol % [Ni], 3 mol % dtbbpy, 2,6-lutidine (3.5 equiv) or Cs<sub>2</sub>CO<sub>3</sub> (1.5 equiv), and dioxane (0.1 M). Reactions were monitored by UHPLC-MS with results displayed as P/IS.

**Table S3.** Additional reaction conditions tested for photocatalyst screen.<sup>a,b,c</sup>

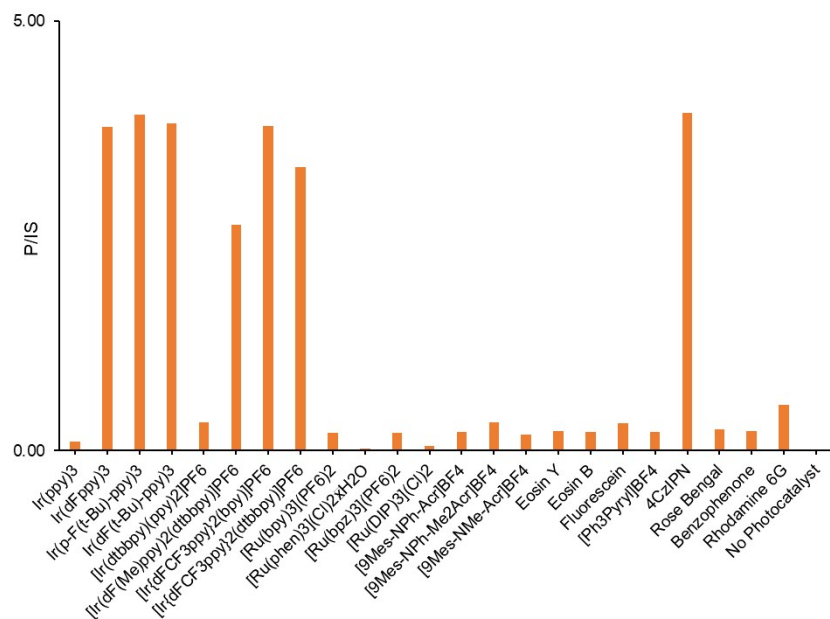

<sup>a</sup>Reaction conditions: **2** (10 μmol) and potassium 1-Boc-piperidin-4-yl trifluoroborate **1b** (1.2 equiv) with 2 mol % [PC], 3 mol % Ni(NO<sub>3</sub>)<sub>2</sub>·6H<sub>2</sub>O, 3 mol % dtbbpy, Cs<sub>2</sub>CO<sub>3</sub> (1.5 equiv), and dioxane (0.1 M) using blue LEDs (470 nm). Reactions were monitored by UHPLC-MS with results displayed as P/IS.

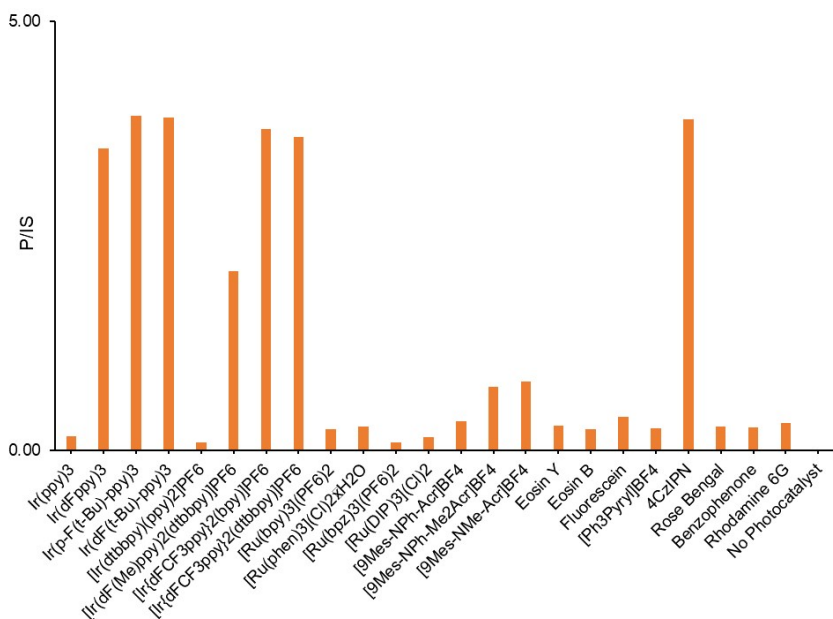

<sup>b</sup>Reaction conditions: **2** (10  $\mu\text{mol}$ ) and **1b** (1.2 equiv) with 2 mol % [PC], 3 mol %  $\text{Ni}(\text{NO}_3)_2 \cdot 6\text{H}_2\text{O}$ , 3 mol % dtbbpy, 2,6-lutidine (3.5 equiv), and 95:5 dioxane/t-AmOH (0.1 M) using blue LEDs (470 nm). Reactions were monitored by UHPLC-MS with results displayed as P/IS.

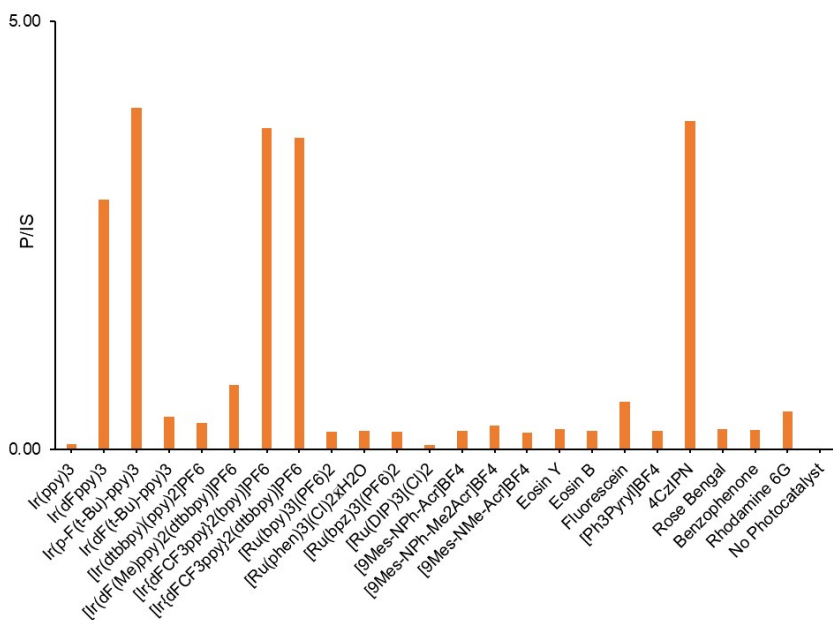

<sup>c</sup>Reaction conditions: **2** (10  $\mu\text{mol}$ ) and **1b** (1.2 equiv) with 2 mol % [PC], 3 mol %  $\text{Ni}(\text{NO}_3)_2 \cdot 6\text{H}_2\text{O}$ , 3 mol % dtbbpy,  $\text{Cs}_2\text{CO}_3$  (1.5 equiv), and 95:5 dioxane/t-AmOH (0.1 M) using blue LEDs (470 nm). Reactions were monitored by UHPLC-MS with results displayed as P/IS.

**Table S4.** Solvent polarities and base conjugate acid pKa values.

| <b>Solvent</b> | <b>Polarity</b> |
|----------------|-----------------|
| t-AmOH         | 2.8             |
| THF            | 4.0             |
| CPME           | 4.0             |
| MEK            | 4.7             |
| 1,4-Dioxane    | 4.8             |
| MeOH           | 5.1             |
| MeCN           | 5.8             |
| DMPU           | 6.0             |
| DMF            | 6.4             |
| DMAc           | 6.5             |
| NMP            | 6.7             |
| DMSO           | 7.2             |

| <b>Base</b>                     | <b>pKa (conjugate acid)</b> |
|---------------------------------|-----------------------------|
| Pyridine                        | 5.2                         |
| 2,6-Lutidine                    | 6.8                         |
| 2,4,6-Collidine                 | 7.4                         |
| Morpholine                      | 8.4                         |
| DABCO                           | 8.8                         |
| DMAP                            | 9.2                         |
| Cs <sub>2</sub> CO <sub>3</sub> | 10.3                        |
| TEA                             | 10.8                        |
| DPA                             | 11.1                        |
| PMP                             | 11.3                        |
| K <sub>2</sub> HPO <sub>4</sub> | 12.3                        |
| DBU                             | 12.5                        |
| DBN                             | 12.7                        |
| TMG                             | 13.6                        |

**Table S5.** Non-basic substrate control reactions.<sup>5</sup>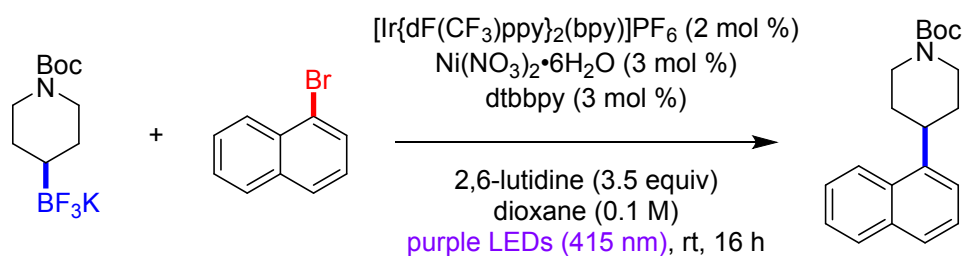**1b**

| Condition            | P/IS |
|----------------------|------|
| with 2,6-lutidine    | 12.3 |
| without 2,6-lutidine | 4.14 |

**Table S6.** Mixed solvent systems.<sup>a</sup>

| Photocatalyst | Solvent             | <b>1a</b> | <b>1b</b> |
|---------------|---------------------|-----------|-----------|
| PC1           | 95:5 MEK/MeOH       | 2.90      | 0.82      |
|               | 95:5 dioxane/MeOH   | 3.38      | 1.86      |
|               | 95:5 dioxane/t-AmOH | 3.43      | 3.01      |
|               | 80:20 dioxane/DMAc  | 3.48      | 3.33      |
| PC2           | 95:5 MEK/MeOH       | 1.69      | 0.88      |
|               | 95:5 dioxane/MeOH   | 2.49      | 1.72      |
|               | 95:5 dioxane/t-AmOH | 2.61      | 3.18      |
|               | 80:20 dioxane/DMAc  | 2.95      | 2.12      |
| PC3           | 95:5 MEK/MeOH       | 1.72      | 1.21      |
|               | 95:5 dioxane/MeOH   | 2.50      | 1.46      |
|               | 95:5 dioxane/t-AmOH | 2.47      | 2.95      |
|               | 80:20 dioxane/DMAc  | 2.11      | 3.17      |
| PC4           | 95:5 MEK/MeOH       | 2.08      | 0.87      |
|               | 95:5 dioxane/MeOH   | 1.40      | 0.73      |
|               | 95:5 dioxane/t-AmOH | 1.87      | 0.59      |
|               | 80:20 dioxane/DMAc  | 1.20      | 0.68      |

<sup>a</sup>Reaction conditions: **2** (10  $\mu\text{mol}$ ) and **1a** or **1b** (1.2 equiv) with 2 mol % [PC], 3 mol %  $\text{Ni}(\text{NO}_3)_2 \cdot 6\text{H}_2\text{O}$ , 3 mol % dtbbpy, 2,6-lutidine (3.5 equiv), and solvent (0.1 M). Reactions were monitored by UHPLC-MS with results displayed as P/IS.





**Table S8.** Average irradiance of each light source at the current used for conducting reactions.

| <b>Light Source</b> | <b>Current (mA)</b> | <b>Average Irradiance (W/m<sup>2</sup>)</b> |
|---------------------|---------------------|---------------------------------------------|
| White (broad)       | 30                  | 320                                         |
| Blue (470 nm)       | 30                  | 394                                         |
| Purple (415 nm)     | 20                  | 281                                         |

## Robustness Study of Ni/photoredox Organoboron Cross-coupling

### *General Procedure for the Robustness Study*

Stock solutions of additive (0.2 M) were prepared in 1,4-dioxane. To a Para-dox plate containing 1 mL reaction vials in a glovebox was added a stock solution of photocatalyst (0.002 M in DCM, 100  $\mu$ L, 2 mol %) and the solvent was removed using a Genevac evaporator. Stock solutions of Ni(NO<sub>3</sub>)<sub>2</sub>•6H<sub>2</sub>O (0.003 M in THF-inhibitor free, 3 mol %) and dtbbpy (0.003 M in THF-inhibitor free, 3 mol %) were prepared and equal volumes of each solution were mixed and allowed to ligate for 20 mins. with gentle shaking. After removing the plate from the Genevac, 100  $\mu$ L of the combined solution was added along with a stock solution of **2** (0.100 M in THF-inhibitor free, 100  $\mu$ L, 10  $\mu$ mol) and the solvent was removed. Next, a stock solution of **1b** (0.120 M in acetone, 100  $\mu$ L, 12  $\mu$ mol) was added and the solvent removed. After completely drying in the Genevac, microstir bars were added. Then, Cs<sub>2</sub>CO<sub>3</sub> was added with a solid dispenser. Finally, a stock solution of 2,6-lutidine (0.350 M) in 1,4-dioxane (50  $\mu$ L) was added to the appropriate wells. Fifty  $\mu$ L of solvent was added to wells with inorganic base. Lastly, 50  $\mu$ L of the additive solutions were placed in the appropriate wells. The plate was sealed and the contents were stirred (300 RPM) at 20 °C for 16 h. The reactions were irradiated with Lumidox UV 96-well LED array (violet – 415 nm) controlled by a Lumidox UV (20 mA intensity) controller. After completion, a 2 mg/mL solution of internal standard (4,4'-dimethylbiphenyl) in MeCN was added to the vials (100  $\mu$ L). An aliquot (100  $\mu$ L) of the resulting mixture was further diluted in 1,4-dioxane (100  $\mu$ L) and subjected to GC-FID analysis. The reactions were further diluted with 50:50 MeCN:H<sub>2</sub>O (300  $\mu$ L) and the contents were thoroughly mixed. An aliquot (25  $\mu$ L) was added to an HPLC plate and further diluted with 50:50 MeCN:H<sub>2</sub>O (500  $\mu$ L). The plate was then subject to UHPLC-MS analysis. The percent additive remaining using GC was calculated by analyzing the stock solution to determine the additive/internal standard ratio and comparing that to the additive/internal standard ratio for the standard reaction.

**Figure S2.** Additives tested in the robustness study.

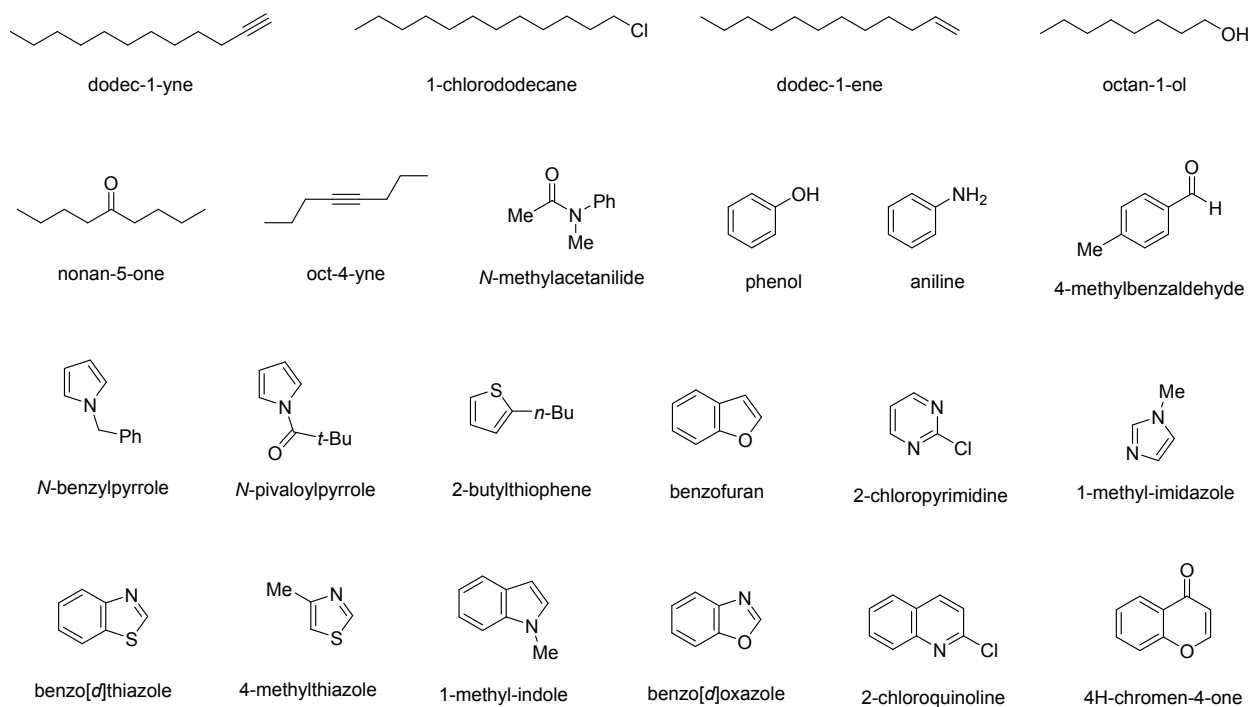

**Table S9.** Complete Robustness Study for the Photocatalytic Cross-Coupling of **1b** and **2**.<sup>a</sup>

| Entry | Additive              | PC1 + 2,6-lutidine |      |                      | PC1 + Cs <sub>2</sub> CO <sub>3</sub> |      |                      | PC2 + 2,6-lutidine |      |                      | PC2 + Cs <sub>2</sub> CO <sub>3</sub> |      |                      |
|-------|-----------------------|--------------------|------|----------------------|---------------------------------------|------|----------------------|--------------------|------|----------------------|---------------------------------------|------|----------------------|
|       |                       | RAP                | Prod | % Additive Remaining | RAP                                   | Prod | % Additive Remaining | RAP                | Prod | % Additive Remaining | RAP                                   | Prod | % Additive Remaining |
| 1     | None                  | 94                 | 6.4  | N/A                  | 55                                    | 45   | N/A                  | 87                 | 13   | N/A                  | 100                                   | 0.0  | N/A                  |
| 2     | dodec-1-yne           | 87                 | 13   | 67                   | 93                                    | 7.3  | 58                   | 85                 | 15   | 61                   | 96                                    | 3.6  | 61                   |
| 3     | 1-chlorododecane      | 91                 | 9.0  | 99                   | 100                                   | 0.0  | 99                   | 88                 | 12   | 99                   | 100                                   | 0.0  | 99                   |
| 4     | dodec-1-ene           | 9.9                | 90   | 99                   | 10                                    | 90   | 99                   | 1.5                | 99   | 99                   | 2.5                                   | 98   | 99                   |
| 5     | octan-1-ol            | 94                 | 6.4  | 0.0                  | 100                                   | 0.0  | 18                   | 68                 | 32   | 0.0                  | 4.5                                   | 95   | 17                   |
| 6     | nonan-5-one           | 92                 | 8.1  | 99                   | 99                                    | 1.0  | 99                   | 93                 | 7.0  | 99                   | 100                                   | 0.0  | 99                   |
| 7     | oct-4-yne             | 90                 | 9.7  | 90                   | 100                                   | 0.0  | 85                   | 91                 | 8.6  | 96                   | 100                                   | 0.0  | 85                   |
| 8     | N-methylacetanilide   | 10                 | 90   | 99                   | 10                                    | 90   | 99                   | 1.5                | 98   | 99                   | 5.0                                   | 95   | 99                   |
| 9     | phenol                | 100                | 0.0  | 91                   | 100                                   | 0.0  | 91                   | 91                 | 8.7  | 77                   | 8.8                                   | 91   | 85                   |
| 10    | aniline               | 8.0                | 92   | 84                   | 11                                    | 89   | 87                   | 1.5                | 99   | 92                   | 1.3                                   | 99   | 97                   |
| 11    | 4-methylbenzaldehyde  | 93                 | 6.7  | 91                   | 100                                   | 0.0  | 96                   | 91                 | 8.5  | 92                   | 100                                   | 0.0  | 97                   |
| 12    | N-benzylpyrrole       | 89                 | 11   | 60                   | 100                                   | 0.0  | 92                   | 80                 | 20   | 89                   | 100                                   | 0.0  | 99                   |
| 13    | N-pivaloylpyrrole     | 1.4                | 99   | 89                   | 4.7                                   | 95   | 74                   | 1.5                | 99   | 99                   | 4.4                                   | 96   | 68                   |
| 14    | 2-butylthiophene      | 90                 | 9.6  | 99                   | 100                                   | 0.0  | 99                   | 86                 | 14   | 99                   | 100                                   | 0.0  | 99                   |
| 15    | benzofuran            | 91                 | 8.5  | 99                   | 100                                   | 0.0  | 99                   | 91                 | 8.6  | 99                   | 100                                   | 0.0  | 99                   |
| 16    | 2-chloropyrimidine    | 5.3                | 95   | 88                   | 1.6                                   | 98   | 95                   | 1.4                | 99   | 94                   | 0.0                                   | 100  | 99                   |
| 17    | 1-methyl-1H-imidazole | 1.9                | 98   | 5.5                  | 2.1                                   | 98   | 99                   | 2.6                | 97   | 95                   | 0.0                                   | 100  | 99                   |
| 18    | benzo[d]thiazole      | 82                 | 18   | 95                   | 91                                    | 8.8  | 98                   | 88                 | 12   | 96                   | 100                                   | 0.0  | 97                   |
| 19    | 4-methylthiazole      | 83                 | 17   | 97                   | 86                                    | 14   | 95                   | 88                 | 12   | 97                   | 100                                   | 0.0  | 97                   |
| 20    | 1-methyl-1H-indole    | 5.8                | 94   | 94                   | 9.1                                   | 91   | 95                   | 1.5                | 99   | 99                   | 4.7                                   | 95   | 99                   |
| 21    | benzo[d]oxazole       | 93                 | 6.8  | 98                   | 64                                    | 36   | 99                   | 94                 | 6.0  | 98                   | 64                                    | 36   | 98                   |
| 22    | 2-chloroquinoline     | 3.6                | 96   | 97                   | 3.5                                   | 96   | 97                   | 4.2                | 96   | 99                   | 0.0                                   | 100  | 99                   |
| 23    | 4H-chromen-4-one      | 95                 | 5.3  | 96                   | 100                                   | 0.0  | 96                   | 93                 | 6.6  | 96                   | 100                                   | 0.0  | 99                   |

<sup>a</sup>Reactions were run in a 96WP format with the following conditions: **2** (10 μmol) and **1b** (1.2 equiv) with 2 mol % [PC], 3 mol % Ni(NO<sub>3</sub>)<sub>2</sub>•6H<sub>2</sub>O, 3 mol % dtbbpy, 2,6-lutidine (3.5 equiv) or Cs<sub>2</sub>CO<sub>3</sub> (1.5 equiv) and dioxane (0.1 M) in the presence of 1 molar equivalent of the additive. The yield of the product (green) and remaining starting material (blue) are given as an UHPLC-MS RAP. The amount of additive remaining (red) is provided as a percentage as determined by gas chromatography with flame-ionization detection (GC/FID).

## Flow Chemistry

### General procedure for Flow Chemistry

Reaction solutions were prepared in a nitrogen-filled glovebox and kept under nitrogen during the reaction. Stock solutions of Ni(NO<sub>3</sub>)<sub>2</sub>•6H<sub>2</sub>O (0.03 M in THF-inhibitor free, 3 mol %) and dtbbpy (0.033 M in THF-inhibitor free, 3.3 mol %) were prepared and 0.5 mL of each solution were added to a 20 mL vial and allowed to ligate for 20 mins. with gentle shaking. The solvent was removed with a Genevac evaporator and once dry, a stir bar was added. Then, [Ir(dF(CF<sub>3</sub>)ppy)<sub>2</sub>(bpy)]PF<sub>6</sub> (10 mg, 0.01 mmol, 2 mol %), **2** (104 mg, 0.5 mmol), and **1b** (291 mg, 1.0 mmol, 2.0 equiv) were added to the reaction vial. Finally, 10.0 mL (0.05 M) or 12.5 mL (0.04 M) of 4:1 dioxane:DMAc stock solution and 206 μL of 2,6-lutidine were added. The reaction mixture was stirred for approximately 5 min. to give a completely homogeneous solution. The reaction was conducted using a Vapourtec flow photoreactor (details above). The pump was primed and reactor pre-equilibrated with blank solvent (4:1 dioxane:DMAc). The temperature was maintained at 35 °C and 4.0 mL of reaction solution was pumped at different flow rates (1.00 mL/min., 10 min residence time; 0.5 mL/min., 20 min. residence time; 0.25 mL/min., 40 min. residence time; 0.166 mL/min., 60 min. residence time) while irradiating with purple LEDs. After the entire reaction had entered the reactor, it was followed by blank solvent at the same flow rate. The pressure was kept between 0-2 bar and ~2.0 mL of steady-state reaction mixture was collected for each timepoint and subject to UHPLC-MS analysis.

**Table S10.** Solubility data for selected potassium trifluoroborate salts.<sup>a</sup>

| Entry | Substrate                                                                           | Dosing Solvents |              |              |      |         |        | Reaction Solvents |              |                    |                    |                  |                  |
|-------|-------------------------------------------------------------------------------------|-----------------|--------------|--------------|------|---------|--------|-------------------|--------------|--------------------|--------------------|------------------|------------------|
|       |                                                                                     | THF             | 2-Me THF     | DCM          | MeCN | acetone | MeOH   | DMAc              | 1,4-dioxane  | 95% dioxane/t-AmOH | 50% dioxane/t-AmOH | 80% dioxane/DMAc | 50% dioxane/DMAc |
| 1     | 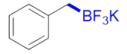 | >95.4           | 2.2          | 0.1          | 74.1 | >94.8   | 37.5   | 15.8              | 27.3         | 25.4               | 6.2                | 17.3             | 32.2             |
| 2     |  | 24.8            | 1.1          | not detected | 63.0 | >99.5   | 68.3   | >98.0             | 9.6          | 7.3                | 2.8                | 42.6             | >91.5            |
| 3     |  | 21.2            | 0.5          | 0.4          | 9.9  | 40.2    | 25.8   | >99.5             | 2.5          | 2.2                | 1.0                | 61.1             | 82.8             |
| 4     |  | 12.6            | 0.4          | not detected | 17.9 | 50.9    | >104.6 | >100.0            | not detected | not detected       | 0.2                | >100.0           | >100.0           |
| 5     |  | 1.3             | 0.1          | 2.1          | 6.5  | 8.2     | 5.3    | 70.5              | 1.2          | 0.7                | 0.7                | 21.4             | 45.4             |
| 6     |  | not detected    | not detected | not detected | 2.9  | 1.6     | 1.5    | >103.8            | 0.1          | 0.1                | not detected       | 4.6              | 47.5             |
| 7     |  | 0.8             | not detected | not detected | 4.4  | 5.1     | 11.5   | >100.0            | not detected | not detected       | not detected       | 8.6              | 65.4             |

<sup>a</sup>Solubility at rt (20-25 °C) in mg/mL

## Chemical Libraries Synthesis

### *General Procedure for Chemical Library Synthesis*

To each 4 mL, round bottom, screw-cap vial was added potassium alkyl trifluoroborate (0.100 mmol, 2.0 equiv) and a stir bar. A 900  $\mu$ L portion of a solution of aryl bromide (0.055 M, 0.050 mmol) and 2,6-lutidine (0.192 M, 3.5 equiv) in 1,4-dioxane was placed in the corresponding vials. Then, 50  $\mu$ L of a solution of  $[\text{Ir}(\text{dF}(\text{CF}_3)\text{ppy})_2(\text{bpy})]\text{PF}_6$  (0.018 M, 0.001 mmol, 2 mol %) in MeCN and 50  $\mu$ L of a solution of  $\text{Ni}(\text{dtbbpy})\text{Br}_2$  (0.025 M, 0.0015 mmol, 3 mol %) in THF were added to the vials. The reactions were degassed and capped under  $\text{N}_2$  atmosphere. The reactions were irradiated with purple LEDs (400 nm) for 24 h with stirring at 750 RPM. After completion, the reaction solvent was removed via a Zymark evaporator. The crude solid was dissolved in DMF (2.0 mL) and filtered through a 0.45  $\mu\text{m}$  PTFE syringe filter into a clean vial. The crude material was purified via preparative LC-MS. The purified material was then subject to LC-MS analysis using either Method A or B.

### *General Photoreactor Setup<sup>6</sup>*

For reactions conducted in 2-dram vials, either purple or blue LED strips were used as the light source. For blue (waterproof), the surface mounted diode (SMD) 5050 chip LEDs produce an individual LED irradiance of  $206 \pm 15 \text{ W/m}^2$  measured at 10 mm away from the LED with a peak intensity wavelength of 450 nm. For purple (non-waterproof), the SMD 5050 chip LEDs produce an individual LED irradiance of  $175 \pm 24 \text{ W/m}^2$  measured at 6 mm away from the LED with a peak intensity wavelength of 400 nm. The measurements were taken at different distances due to detector saturation. Reaction vials were placed at a distance of 10 mm from the light source to the face of the vial.

*O<sub>2</sub> Sensitivity Experiments*

**Table S11.** O<sub>2</sub> sensitivity experiments varying time and light source.

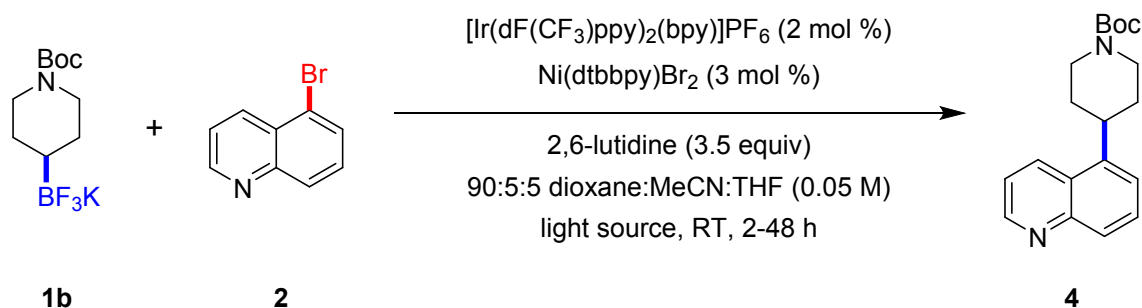

| Technique                                        | Time (h) | Light Source         | 2 RAP | 4 RAP |
|--------------------------------------------------|----------|----------------------|-------|-------|
| Setup in glovebox <sup>a</sup>                   | 24       | Blue LEDs (450 nm)   | 19    | 81    |
| No degassing <sup>b</sup>                        | 24       | Blue LEDs (450 nm)   | 63    | 37    |
| Direct sparging with N <sub>2</sub> <sup>c</sup> | 24       | Blue LEDs (450 nm)   | 43    | 57    |
| Evacuate/refill with Ar <sup>d</sup>             | 24       | Blue LEDs (450 nm)   | 56    | 44    |
| Antechamber degas <sup>e</sup>                   | 24       | Blue LEDs (450 nm)   | 33    | 67    |
| Setup in glovebox                                | 48       | Blue LEDs (450 nm)   | 0.0   | 100   |
| No degassing                                     | 48       | Blue LEDs (450 nm)   | 0.0   | 100   |
| Evacuate/refill with Ar                          | 48       | Blue LEDs (450 nm)   | 0.0   | 100   |
| Setup in glovebox                                | 2        | Purple LEDs (400 nm) | 76    | 24    |
| Setup in glovebox                                | 4        | Purple LEDs (400 nm) | 63    | 37    |
| Setup in glovebox                                | 6        | Purple LEDs (400 nm) | 36    | 64    |
| Setup in glovebox                                | 8        | Purple LEDs (400 nm) | 32    | 68    |
| Setup in glovebox                                | 24       | Purple LEDs (400 nm) | 0.0   | 100   |
| No degassing                                     | 24       | Purple LEDs (400 nm) | 10    | 90    |
| Direct sparging with N <sub>2</sub>              | 24       | Purple LEDs (400 nm) | 0.0   | 100   |
| Evacuate/refill with Ar                          | 24       | Purple LEDs (400 nm) | 0.0   | 100   |
| Antechamber degas                                | 24       | Purple LEDs (400 nm) | 0.0   | 100   |

<sup>a</sup>Reactions set up in glovebox under inert N<sub>2</sub> atmosphere; <sup>b</sup>reactions set up on benchtop with no effort to exclude O<sub>2</sub>; <sup>c</sup>reactions were directly sparged with N<sub>2</sub> for 10-20 mins.; <sup>d</sup>reactions were vented with a needle and degassed in a desiccator by evacuating and refilling with Ar (3x Ar fill, 2x evacuated); <sup>e</sup>reactions were degassed in a glovebox antechamber by evacuating and refilling with N<sub>2</sub> (5x evacuated and refilled with N<sub>2</sub>) and subsequently capped under inert N<sub>2</sub> atmosphere. Reaction success was determined based on the UHPLC-MS RAP of the cross-coupled product from the crude reaction mixture.

**Table S12.** Fourteen- and Twenty-member Photocatalytic Cross-Coupling Chemical Libraries.

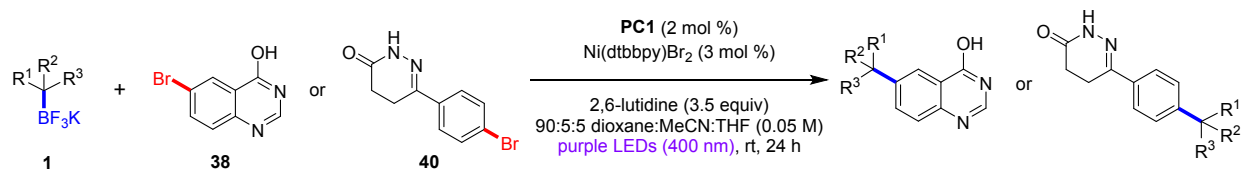

|                                                                    |                                                                    |                                                                    |                                                                    |                                                                    |
|--------------------------------------------------------------------|--------------------------------------------------------------------|--------------------------------------------------------------------|--------------------------------------------------------------------|--------------------------------------------------------------------|
|                                                                    |                                                                    |                                                                    |                                                                    |                                                                    |
| <b>core 38 - 52</b> , 84% yield<br><b>core 40 - 80</b> , 75% yield | <b>core 38 - 53</b> , 38% yield<br><b>core 40 - 81</b> , 45% yield | <b>core 38 - 54</b> , 56% yield<br><b>core 40 - 82</b> , 50% yield | <b>core 38 - 55</b> , 36% yield<br><b>core 40 - 83</b> , 42% yield | <b>core 38 - 56</b> , 55% yield<br><b>core 40 - 84</b> , 55% yield |
|                                                                    |                                                                    |                                                                    |                                                                    |                                                                    |
| <b>core 38 - 57</b> , 35% yield<br><b>core 40 - 85</b> , 39% yield | <b>core 38 - 58</b> , 0% yield<br><b>core 40 - 86</b> , 0% yield   | <b>core 38 - 59</b> , 37% yield<br><b>core 40 - 87</b> , 57% yield | <b>core 38 - 60</b> , 65% yield<br><b>core 40 - 88</b> , 62% yield | <b>core 38 - 61</b> , 48% yield<br><b>core 40 - 89</b> , 57% yield |
|                                                                    |                                                                    |                                                                    |                                                                    |                                                                    |
| <b>core 38 - 62</b> , 64% yield<br><b>core 40 - 90</b> , 45% yield | <b>core 38 - 63</b> , 41% yield<br><b>core 40 - 91</b> , 49% yield | <b>core 38 - 64</b> , 65% yield<br><b>core 40 - 92</b> , 65% yield | <b>core 38 - 65</b> , 32% yield<br><b>core 40 - 93</b> , 50% yield | <b>core 40 - 122</b> , 68% yield                                   |
|                                                                    |                                                                    |                                                                    |                                                                    |                                                                    |
| <b>core 40 - 123</b> , 63% yield                                   | <b>core 40 - 124</b> , 63% yield                                   | <b>core 40 - 125</b> , 25% yield                                   | <b>core 40 - 126</b> , <5% yield                                   | <b>core 40 - 127</b> , 0% yield                                    |

## Characterization Data for Chemical Library Compounds

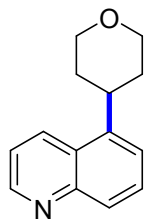

**5-(tetrahydro-2H-pyran-4-yl)quinoline (45):** 0.6 mg (6% yield);  $^1\text{H NMR}$  (500 MHz,  $\text{DMSO-}d_6$ )  $\delta$  8.99–8.82 (m, 1H), 8.69 (br d,  $J=8.5$  Hz, 1H), 7.90 (br d,  $J=8.2$  Hz, 1H), 7.82–7.66 (m, 1H), 7.64–7.47 (m, 2H), 4.00 (br d,  $J=9.9$  Hz, 3H), 3.75–3.57 (m, 1H), 1.93–1.72 (m, 5H); **LC** Method B: Purity = 98%, Retention Time = 0.90 min.; Method A: Purity = 100%, Retention Time = 1.36 min.; **MS (ESI)** 214.12 (M + H) $^+$ .

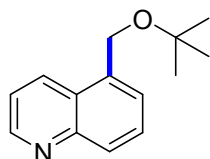

**5-(tert-butoxymethyl)quinoline (48):** 1.2 mg (11% yield);  $^1\text{H NMR}$  (500 MHz,  $\text{DMSO-}d_6$ )  $\delta$  8.93 (br d,  $J=3.1$  Hz, 1H), 8.54 (br d,  $J=8.2$  Hz, 1H), 7.97 (d,  $J=8.2$  Hz, 1H), 7.74 (t,  $J=7.8$  Hz, 1H), 7.65 (d,  $J=7.1$  Hz, 2H), 7.60 (q,  $J=7.9$  Hz, 1H), 4.89 (s, 2H), 1.33 (s, 9H); **LC** Method B: Purity = 91%, Retention Time = 1.19 min.; Method A: Purity = 99%, Retention Time = 1.76 min.; **MS (ESI)** 216.13 (M + H) $^+$ .

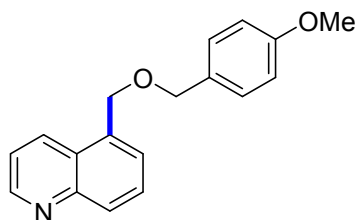

**5-(((4-methoxybenzyl)oxy)methyl)quinoline (51):** 3.9 mg (28% yield);  $^1\text{H NMR}$  (500 MHz,  $\text{DMSO-}d_6$ )  $\delta$  8.93 (br d,  $J=2.7$  Hz, 1H), 8.53 (br d,  $J=8.2$  Hz, 1H), 8.01 (d,  $J=8.5$  Hz, 1H), 7.75 (t,  $J=7.8$  Hz, 1H), 7.64 (d,  $J=7.1$  Hz, 1H), 7.62–7.57 (m, 1H), 7.35–7.25 (m,  $J=8.5$  Hz, 2H), 6.97–6.89 (m,  $J=8.5$  Hz, 2H), 4.97 (s, 2H), 4.55 (s, 2H), 3.75 (s, 3H); **LC** Method A: Purity = 100%, Retention Time = 1.81 min.; Method B: Purity = 97%, Retention Time = 1.33 min.; **MS (ESI)** 280.13 (M + H) $^+$ .

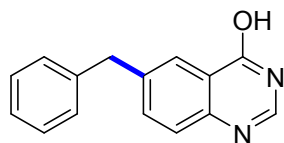

**6-benzylquinazolin-4-ol (52):** 9.9 mg (84% yield);  $^1\text{H NMR}$  (500 MHz,  $\text{DMSO-}d_6$ )  $\delta$  8.05 (s, 1H), 7.96 (s, 1H), 7.72 (br d,  $J=6.7$  Hz, 1H), 7.62 (d,  $J=8.5$  Hz, 1H), 7.35–7.21 (m, 5H), 4.12 (s,



2H); **LC Method A:** Purity = 99%, Retention Time = 1.46 min.; **Method B:** Purity = 99%, Retention Time = 1.48 min.; **MS (ESI)** 237.10 (M + H)<sup>+</sup>.

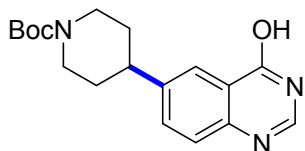

**tert-butyl 4-(4-hydroxyquinazolin-6-yl)piperidine-1-carboxylate (53):** 6.3 mg (38% yield); **<sup>1</sup>H NMR** (500 MHz, DMSO-*d*<sub>6</sub>) δ 8.06 (s, 1H), 7.95 (s, 1H), 7.75 (d, *J*=7.8 Hz, 1H), 7.64 (d, *J*=8.5 Hz, 1H), 4.11 (br d, *J*=11.9 Hz, 2H), 2.96–2.75 (m, 3H), 1.84 (br d, *J*=12.8 Hz, 2H), 1.61–1.47 (m, 2H), 1.44 (s, 9H); **LC Method A:** Purity = 100%, Retention Time = 1.66 min.; **Method B:** Purity = 100%, Retention Time = 1.62 min.; **MS (ESI)** 330.17 (M + H)<sup>+</sup>.

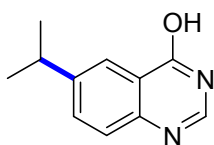

**6-isopropylquinazolin-4-ol (54):** 5.3 mg (56% yield); **<sup>1</sup>H NMR** (500 MHz, DMSO-*d*<sub>6</sub>) δ 8.05 (s, 1H), 7.97 (s, 1H), 7.75 (dd, *J*=8.5, 1.8 Hz, 1H), 7.63 (d, *J*=8.5 Hz, 1H), 3.08 (dt, *J*=13.7, 6.8 Hz, 2H), 1.28 (d, *J*=7.0 Hz, 6H); **LC Method B:** Purity = 100%, Retention Time = 1.33 min.; **Method A:** Purity = 100%, Retention Time = 1.36 min.; **MS (ESI)** 189.10 (M + H)<sup>+</sup>.

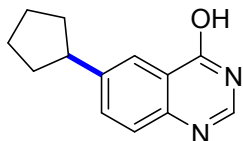

**6-cyclopentylquinazolin-4-ol (55):** 3.9 mg (36% yield); **<sup>1</sup>H NMR** (500 MHz, DMSO-*d*<sub>6</sub>) δ 8.05 (s, 1H), 7.97 (s, 1H), 7.74 (d, *J*=8.2 Hz, 1H), 7.62 (d, *J*=8.5 Hz, 1H), 3.16 (br t, *J*=7.9 Hz, 1H), 2.10 (br s, 2H), 1.82 (br s, 2H), 1.71 (br dd, *J*=7.2, 4.7 Hz, 2H), 1.67–1.51 (m, 2H); **LC Method A:** Purity = 96%, Retention Time = 1.52 min.; **Method B:** Purity = 95%, Retention Time = 1.52 min.; **MS (ESI)** 215.11 (M + H)<sup>+</sup>.

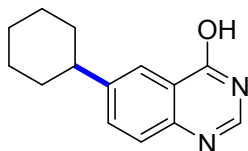

**6-cyclohexylquinazolin-4-ol (56):** 6.3 mg (55% yield); **<sup>1</sup>H NMR** (500 MHz, DMSO-*d*<sub>6</sub>) δ 8.05 (s, 1H), 7.95 (s, 1H), 7.73 (br d, *J*=8.2 Hz, 1H), 7.62 (d, *J*=8.2 Hz, 1H), 2.82–2.62 (m, 1H), 1.85 (br t, *J*=11.6 Hz, 4H), 1.74 (br d, *J*=12.2 Hz, 1H), 1.52–1.37 (m, 4H), 1.35–1.14 (m, 1H); **LC Method A:** Purity = 99%, Retention Time = 1.67 min.; **Method B:** Purity = 98%, Retention Time = 1.67 min.; **MS (ESI)** 229.12 (M + H)<sup>+</sup>.

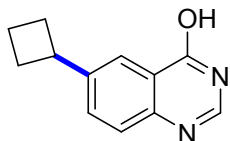

**6-cyclobutylquinazolin-4-ol (57):** 3.5 mg (35% yield);  $^1\text{H NMR}$  (500 MHz,  $\text{DMSO-}d_6$ )  $\delta$  8.06 (s, 1H), 7.94 (s, 1H), 7.76–7.68 (m, 1H), 7.63 (d,  $J=8.5$  Hz, 1H), 3.69 (br t,  $J=8.7$  Hz, 1H), 2.44–2.31 (m, 2H), 2.19–2.10 (m, 2H), 2.08–1.99 (m, 1H), 1.93–1.83 (m, 1H); **LC Method A:** Purity = 100%, Retention Time = 1.39 min.; **Method B:** Purity = 100%, Retention Time = 1.39 min.; **MS (ESI)** 201.10 ( $\text{M} + \text{H}$ ) $^+$ .

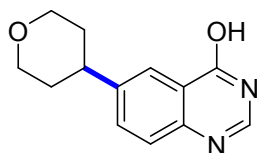

**6-(tetrahydro-2H-pyran-4-yl)quinazolin-4-ol (59):** 4.3 mg (37% yield);  $^1\text{H NMR}$  (500 MHz,  $\text{DMSO-}d_6$ )  $\delta$  8.06 (br s, 1H), 7.97 (s, 1H), 7.77 (dd,  $J=8.5, 1.8$  Hz, 1H), 7.65 (d,  $J=8.2$  Hz, 1H), 3.99 (br dd,  $J=11.1, 3.5$  Hz, 3H), 2.96 (br t,  $J=11.9$  Hz, 1H), 1.82–1.66 (m, 5H); **LC Method A:** Purity = 100%, Retention Time = 1.05 min.; **Method B:** Purity = 100%, Retention Time = 1.07 min.; **MS (ESI)** 231.11 ( $\text{M} + \text{H}$ ) $^+$ .

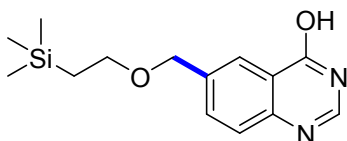

**6-((2-(trimethylsilyl)ethoxy)methyl)quinazolin-4-ol (60):** 9.0 mg (65% yield);  $^1\text{H NMR}$  (500 MHz,  $\text{DMSO-}d_6$ )  $\delta$  8.06 (s, 2H), 7.74 (br d,  $J=8.2$  Hz, 1H), 7.65 (d,  $J=8.2$  Hz, 1H), 4.56 (s, 2H), 3.58 (t,  $J=7.9$  Hz, 2H), 0.94 (t,  $J=7.9$  Hz, 2H), 0.00 (s, 9H); **LC Method A:** Purity = 100%, Retention Time = 1.82 min.; **Method B:** Purity = 100%, Retention Time = 1.84 min.; **MS (ESI)** 277.13 ( $\text{M} + \text{H}$ ) $^+$ .

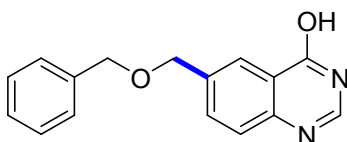

**6-((benzyloxy)methyl)quinazolin-4-ol (61):** 6.4 mg (48% yield);  $^1\text{H NMR}$  (500 MHz,  $\text{DMSO-}d_6$ )  $\delta$  8.12 (s, 1H), 8.10 (br s, 1H), 7.81 (br d,  $J=6.7$  Hz, 1H), 7.69 (d,  $J=8.2$  Hz, 1H), 7.40 (d,  $J=4.3$  Hz, 4H), 7.37–7.30 (m, 1H), 4.70 (s, 2H), 4.60 (s, 2H); **LC Method A:** Purity = 100%, Retention Time = 1.56 min.; **Method B:** Purity = 100%, Retention Time = 1.53 min.; **MS (ESI)** 267.11 ( $\text{M} + \text{H}$ ) $^+$ .

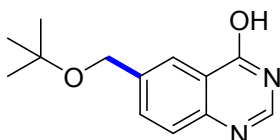

**6-(tert-butoxymethyl)quinazolin-4-ol (62):** 7.4 mg (64% yield);  $^1\text{H NMR}$  (500 MHz,  $\text{DMSO-}d_6$ )  $\delta$  8.08 (s, 2H), 7.76 (br d,  $J=7.9$  Hz, 1H), 7.65 (d,  $J=8.5$  Hz, 1H), 4.56 (s, 2H), 1.28 (s, 9H); **LC Method A:** Purity = 99%, Retention Time = 1.33 min.; **Method B:** Purity = 99%, Retention Time = 1.36 min.; **MS (ESI)** 233.12 (M + H) $^+$ .

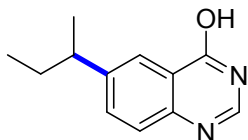

**6-(sec-butyl)quinazolin-4-ol (63):** 4.1 mg (41% yield);  $^1\text{H NMR}$  (500 MHz,  $\text{DMSO-}d_6$ )  $\delta$  8.05 (s, 1H), 7.93 (s, 1H), 7.71 (dd,  $J=8.4, 1.7$  Hz, 1H), 7.63 (d,  $J=8.2$  Hz, 1H), 2.83–2.67 (m, 1H), 1.71–1.54 (m, 2H), 1.26 (d,  $J=6.7$  Hz, 3H), 0.79 (t,  $J=7.3$  Hz, 3H); **LC Method A:** Purity = 99%, Retention Time = 1.45 min.; **Method B:** Purity = 97%, Retention Time = 1.45 min.; **MS (ESI)** 203.11 (M + H) $^+$ .

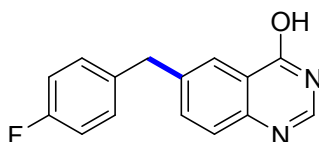

**6-(4-fluorobenzyl)quinazolin-4-ol (64):** 8.2 mg (65% yield);  $^1\text{H NMR}$  (500 MHz,  $\text{DMSO-}d_6$ )  $\delta$  8.06 (s, 1H), 7.96 (s, 1H), 7.71 (d,  $J=8.2$  Hz, 1H), 7.63 (d,  $J=8.2$  Hz, 1H), 7.33 (t,  $J=6.6$  Hz, 2H), 7.15 (t,  $J=8.9$  Hz, 2H), 4.12 (s, 2H); **LC Method A:** Purity = 99%, Retention Time = 1.49 min.; **Method B:** Purity = 99%, Retention Time = 1.52 min.; **MS (ESI)** 255.09 (M + H) $^+$ .

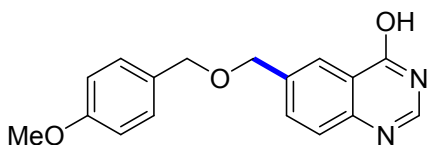

**6-(((4-methoxybenzyl)oxy)methyl)quinazolin-4-ol (65):** 4.8 mg (32% yield);  $^1\text{H NMR}$  (500 MHz,  $\text{DMSO-}d_6$ )  $\delta$  8.10 (s, 2H), 7.79 (br d,  $J=8.2$  Hz, 1H), 7.68 (d,  $J=8.2$  Hz, 1H), 7.37–7.27 (m,  $J=8.5$  Hz, 2H), 6.99–6.92 (m,  $J=8.5$  Hz, 2H), 4.66 (s, 2H), 4.52 (s, 2H), 3.78 (s, 3H); **LC Method A:** Purity = 99%, Retention Time = 1.44 min.; **Method B:** Purity = 99%, Retention Time = 1.47 min.; **MS (ESI)** 297.12 (M + H) $^+$ .

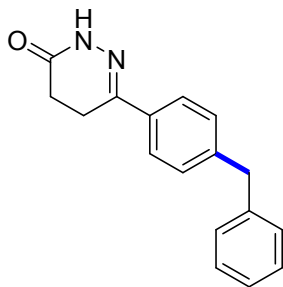

**6-(4-benzylphenyl)-4,5-dihydropyridazin-3(2H)-one (80):** 9.9 mg (75% yield);  $^1\text{H NMR}$  (500 MHz,  $\text{DMSO-}d_6$ )  $\delta$  10.87 (s, 1H), 7.67 (d,  $J=8.3$  Hz, 2H), 7.32–7.27 (m, 4H), 7.24–7.17 (m, 3H),

3.97 (s, 2H), 2.92 (t,  $J=8.3$  Hz, 2H), 2.45–2.40 (m, 2H); LC Method B: Purity = 100%, Retention Time = 1.79 min.; Method A: Purity = 100%, Retention Time = 1.78 min.; MS (ESI) 265.13 (M + H)<sup>+</sup>.

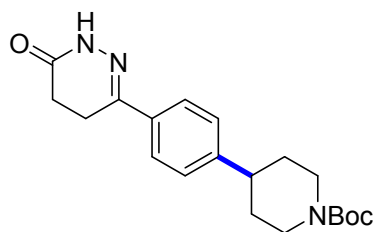

**Tert-butyl 4-(4-(6-oxo-1,4,5,6-tetrahydropyridazin-3-yl)phenyl)piperidine-1-carboxylate (81):** 8.1 mg (45% yield); <sup>1</sup>H NMR (500 MHz, DMSO-*d*<sub>6</sub>) δ 10.93 (s, 1H), 7.74 (d,  $J=8.2$  Hz, 2H), 7.36 (br d,  $J=8.2$  Hz, 2H), 4.13 (br s, 2H), 2.99 (t,  $J=8.2$  Hz, 2H), 2.87 (br s, 1H), 2.78 (br t,  $J=12.2$  Hz, 2H), 2.55–2.44 (m, 2H), 1.81 (br d,  $J=12.8$  Hz, 2H), 1.58–1.45 (m, 2H), 1.48 (s, 9H); LC Method B: Purity = 95%, Retention Time = 1.81 min.; Method A: Purity = 100%, Retention Time = 1.92 min.; MS (ESI) 358.21 (M + H)<sup>+</sup>.

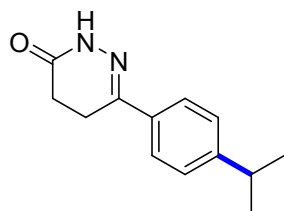

**6-(4-(isopropylphenyl)-4,5-dihydropyridazin-3(2H)-one (82):** 5.4 mg (50% yield); <sup>1</sup>H NMR (500 MHz, DMSO-*d*<sub>6</sub>) δ 10.88 (s, 1H), 7.74–7.65 (m,  $J=8.2$  Hz, 2H), 7.36–7.28 (m,  $J=8.2$  Hz, 2H), 3.01–2.88 (m, 3H), 2.51–2.40 (m, 2H), 1.23 (d,  $J=7.0$  Hz, 6H); LC Method A: Purity = 100%, Retention Time = 1.74 min.; Method B: Purity = 100%, Retention Time = 1.73 min.; MS (ESI) 217.13 (M + H)<sup>+</sup>.

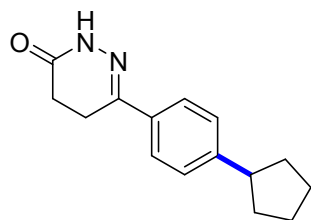

**6-(4-(cyclopentylphenyl)-4,5-dihydropyridazin-3(2H)-one (83):** 5.0 mg (42% yield); <sup>1</sup>H NMR (500 MHz, DMSO-*d*<sub>6</sub>) δ 10.86 (s, 1H), 7.69–7.63 (m,  $J=8.3$  Hz, 2H), 7.33–7.27 (m,  $J=8.2$  Hz, 2H), 3.04–2.97 (m, 1H), 2.95–2.89 (m, 2H), 2.49–2.37 (m, 2H), 2.07–1.96 (m, 2H), 1.82–1.72 (m, 2H), 1.70–1.61 (m, 2H), 1.57–1.50 (m, 2H); LC Method A: Purity = 97%, Retention Time = 1.88 min.; Method B: Purity = 98%, Retention Time = 1.92 min.; MS (ESI) 243.14 (M + H)<sup>+</sup>.

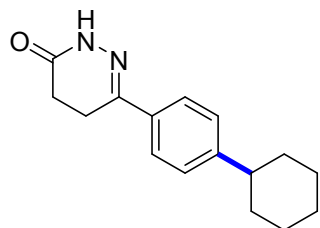

**6-(4-cyclohexylphenyl)-4,5-dihydropyridazin-3(2H)-one (84):** 7.1 mg (55% yield);  $^1\text{H NMR}$  (500 MHz,  $\text{DMSO-}d_6$ )  $\delta$  10.87 (s, 1H), 7.67 (d,  $J=8.2$  Hz, 2H), 7.29 (d,  $J=8.2$  Hz, 2H), 2.94 (t,  $J=8.2$  Hz, 2H), 2.50–2.37 (m, 2H), 1.93–1.76 (m, 4H), 1.72 (br d,  $J=11.6$  Hz, 1H), 1.48–1.30 (m, 4H), 1.25 (br d,  $J=12.2$  Hz, 2H); **LC Method B:** Purity = 99%, Retention Time = 2.03 min.; **Method A:** Purity = 100%, Retention Time = 2.12 min.; **MS (ESI)** 257.16 (M + H) $^+$ .

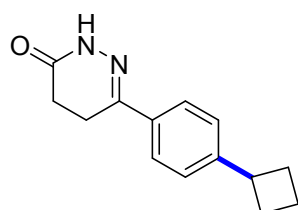

**6-(4-cyclobutylphenyl)-4,5-dihydropyridazin-3(2H)-one (85):** 4.3 mg (39% yield);  $^1\text{H NMR}$  (500 MHz,  $\text{DMSO-}d_6$ )  $\delta$  10.86 (s, 1H), 7.72–7.64 (m,  $J=8.3$  Hz, 2H), 7.32–7.24 (m,  $J=8.2$  Hz, 2H), 3.71–3.50 (m, 1H), 2.93 (t,  $J=8.3$  Hz, 2H), 2.49–2.40 (m, 2H), 2.37–2.24 (m, 2H), 2.13–2.05 (m, 2H), 2.03–1.94 (m, 1H), 1.82 (q,  $J=9.7$  Hz, 1H); **LC Method A:** Purity = 96%, Retention Time = 1.75 min.; **Method B:** Purity = 99%, Retention Time = 1.78 min.; **MS (ESI)** 229.13 (M + H) $^+$ .

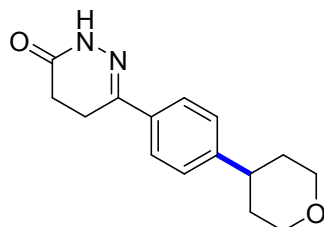

**6-(4-(tetrahydro-2H-pyran-4-yl)phenyl)-4,5-dihydropyridazin-3(2H)-one (87):** 7.3 mg (57% yield);  $^1\text{H NMR}$  (500 MHz,  $\text{DMSO-}d_6$ )  $\delta$  10.89 (s, 1H), 7.74–7.68 (m,  $J=8.2$  Hz, 2H), 7.37–7.29 (m,  $J=8.2$  Hz, 2H), 3.97 (br d,  $J=10.7$  Hz, 2H), 3.47 (br d,  $J=7.9$  Hz, 1H), 2.95 (t,  $J=8.2$  Hz, 2H), 2.82 (dt,  $J=10.0, 5.2$  Hz, 1H), 2.51–2.40 (m, 3H), 1.74–1.64 (m, 4H); **LC Method A:** Purity = 100%, Retention Time = 1.39 min.; **Method B:** Purity = 100%, Retention Time = 1.38 min.; **MS (ESI)** 259.14 (M + H) $^+$ .

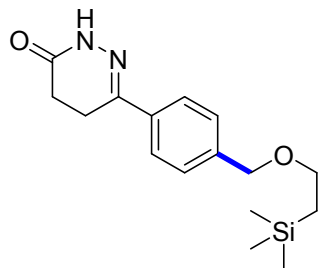

**6-(4-((2-trimethylsilyl)ethoxy)methyl)phenyl)-4,5-dihydropyridazin-3(2H)-one (88):** 9.5 mg (62% yield);  $^1\text{H NMR}$  (500 MHz,  $\text{DMSO-}d_6$ )  $\delta$  10.90 (s, 1H), 7.72 (d,  $J=8.2$  Hz, 2H), 7.36 (d,  $J=8.3$  Hz, 2H), 4.46 (s, 2H), 3.55 (t,  $J=8.0$  Hz, 2H), 2.94 (t,  $J=8.3$  Hz, 2H), 2.49–2.42 (m, 2H), 0.93 (t,  $J=7.9$  Hz, 2H), 0.00 (s, 9H); LC Method A: Purity = 100%, Retention Time = 2.12 min.; Method B: Purity = 100%, Retention Time = 2.15 min.; MS (ESI) 305.16 (M + H) $^+$ .

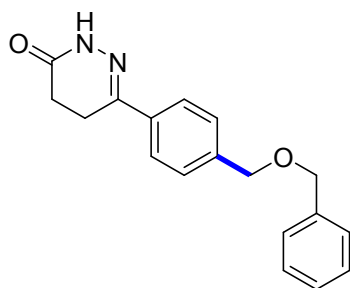

**6-(4-((benzyloxy)methyl)phenyl)-4,5-dihydropyridazin-3(2H)-one (89):** 8.5 mg (57% yield);  $^1\text{H NMR}$  (500 MHz,  $\text{DMSO-}d_6$ )  $\delta$  10.91 (s, 1H), 7.74 (d,  $J=8.4$  Hz, 2H), 7.43–7.34 (m, 6H), 7.34–7.16 (m, 1H), 4.56 (s, 2H), 4.54 (s, 2H), 2.95 (t,  $J=8.3$  Hz, 2H), 2.49–2.39 (m, 2H); LC Method A: Purity = 99%, Retention Time = 1.71 min.; Method B: Purity = 100%, Retention Time = 1.75 min.; MS (ESI) 295.14 (M + H) $^+$ .

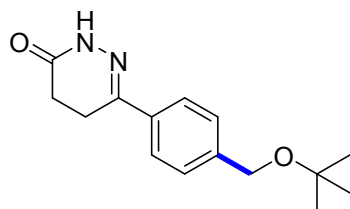

**6-(4-((tert-butoxymethyl)phenyl)-4,5-dihydropyridazin-3(2H)-one (90):** 5.8 mg (45% yield);  $^1\text{H NMR}$  (500 MHz,  $\text{DMSO-}d_6$ )  $\delta$  10.90 (s, 1H), 7.73 (d,  $J=8.2$  Hz, 2H), 7.38 (br d,  $J=7.9$  Hz, 2H), 4.45 (s, 2H), 2.96 (t,  $J=8.1$  Hz, 2H), 2.51–2.41 (m, 2H), 1.25 (s, 9H); LC Method A: Purity = 100%, Retention Time = 1.72 min.; Method B: Purity = 100%, Retention Time = 1.71 min.; MS (ESI) 261.15 (M + H) $^+$ .

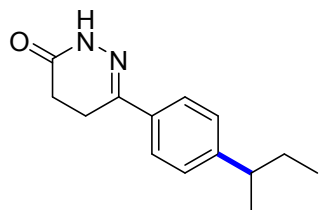

**6-(4-(sec-butyl)phenyl)-4,5-dihydropyridazin-3(2H)-one (91):** 5.9 mg (49% yield);  $^1\text{H NMR}$  (500 MHz,  $\text{DMSO-}d_6$ )  $\delta$  10.86 (s, 1H), 7.70–7.64 (m,  $J=8.4$  Hz, 2H), 7.29–7.21 (m,  $J=8.3$  Hz, 2H), 2.93 (t,  $J=8.3$  Hz, 2H), 2.66–2.52 (m, 1H), 2.49–2.37 (m, 2H), 1.62–1.50 (m, 2H), 1.19 (d,  $J=6.9$  Hz, 3H), 0.76 (t,  $J=7.4$  Hz, 3H); LC Method A: Purity = 100%, Retention Time = 1.81 min.; Method B: Purity = 97%, Retention Time = 1.85 min.; MS (ESI) 231.14 (M + H) $^+$ .

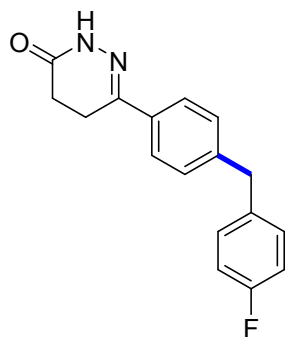

**6-(4-(4-fluorobenzyl)phenyl)-4,5-dihydropyridazin-3(2H)-one (92):** 9.2 mg (65% yield);  $^1\text{H NMR}$  (500 MHz,  $\text{DMSO-}d_6$ )  $\delta$  10.89 (s, 1H), 7.69 (d,  $J=8.2$  Hz, 2H), 7.36–7.22 (m, 4H), 7.13 (br t,  $J=8.9$  Hz, 2H), 3.98 (s, 2H), 2.94 (t,  $J=8.2$  Hz, 2H), 2.50–2.38 (m, 2H); LC Method A: Purity = 100%, Retention Time = 1.85 min.; Method B: Purity = 99%, Retention Time = 1.77 min.; MS (ESI) 283.12 (M + H) $^+$ .

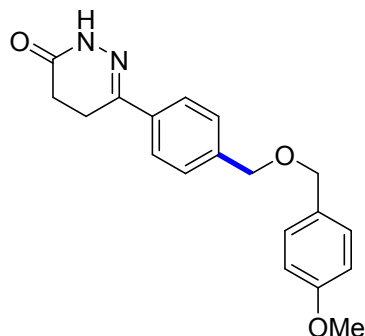

**6-(4-(((4-methoxybenzyl)oxy)methyl)phenyl)-4,5-dihydropyridazin-3(2H)-one (93):** 8.1 mg (50% yield);  $^1\text{H NMR}$  (500 MHz,  $\text{DMSO-}d_6$ )  $\delta$  10.93 (s, 1H), 7.79–7.72 (m,  $J=8.2$  Hz, 2H), 7.46–7.37 (m,  $J=8.2$  Hz, 2H), 7.35–7.26 (m,  $J=8.5$  Hz, 2H), 6.98–6.92 (m,  $J=8.5$  Hz, 2H), 4.55 (s, 2H), 4.48 (s, 2H), 3.77 (s, 3H), 2.97 (t,  $J=8.2$  Hz, 2H), 2.51–2.43 (m, 2H); LC Method A: Purity = 100%, Retention Time = 1.75 min.; Method B: Purity = 99%, Retention Time = 1.68 min.; MS (ESI) 325.15 (M + H) $^+$ .

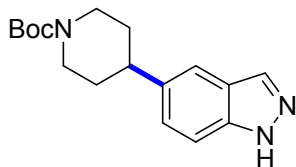

**tert-butyl 4-(1H-indazol-5-yl)piperidine-1-carboxylate (95):** 2.7 mg (18% yield);  $^1\text{H NMR}$  (500 MHz,  $\text{DMSO-}d_6$ )  $\delta$  7.98 (s, 1H), 7.57 (s, 1H), 7.46 (d,  $J=8.5$  Hz, 1H), 7.26 (br d,  $J=8.4$  Hz, 1H), 4.10 (br s, 2H), 2.86–2.66 (m, 3H), 1.80 (br d,  $J=13.1$  Hz, 2H), 1.56–1.49 (m, 2H), 1.43 (s, 9H); **LC Method B:** Purity = 98%, Retention Time = 1.84 min.; **Method A:** Purity = 97%, Retention Time = 1.91 min.; **MS (ESI)** 302.18 ( $\text{M} + \text{H}$ ) $^+$ .

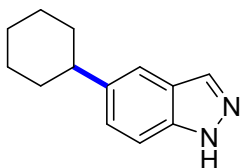

**5-cyclohexyl-1H-indazole (98):** 2.8 mg (28% yield);  $^1\text{H NMR}$  (500 MHz,  $\text{DMSO-}d_6$ )  $\delta$  12.91 (br s, 1H), 7.99 (s, 1H), 7.55 (s, 1H), 7.46 (d,  $J=8.9$  Hz, 1H), 7.26 (br d,  $J=8.2$  Hz, 1H), 2.67–2.55 (m, 1H), 1.84 (br t,  $J=11.7$  Hz, 4H), 1.74 (br d,  $J=12.8$  Hz, 1H), 1.52–1.36 (m, 4H), 1.34–1.13 (m, 1H); **LC Method A:** Purity = 100%, Retention Time = 2.18 min.; **Method B:** Purity = 99%, Retention Time = 2.09 min.; **MS (ESI)** 201.13 ( $\text{M} + \text{H}$ ) $^+$ .

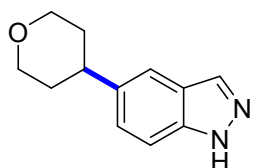

**5-(tetrahydro-2H-pyran-4-yl)-1H-indazole (101):** 1.2 mg (12% yield);  $^1\text{H NMR}$  (500 MHz,  $\text{DMSO-}d_6$ )  $\delta$  8.00 (s, 1H), 7.57 (s, 1H), 7.47 (d,  $J=8.6$  Hz, 1H), 7.37–7.24 (m, 1H), 4.03–3.90 (m, 3H), 3.00–2.80 (m, 1H), 1.81–1.66 (m, 5H); **LC Method A:** Purity = 100%, Retention Time = 1.21 min.; **Method B:** Purity = 100%, Retention Time = 1.28 min.; **MS (ESI)** 203.11 ( $\text{M} + \text{H}$ ) $^+$ .

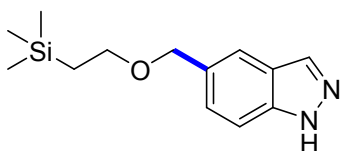

**5-((2-(trimethylsilyl)ethoxy)methyl)-1H-indazole (102):** 3.2 mg (26% yield);  $^1\text{H NMR}$  (500 MHz,  $\text{DMSO-}d_6$ )  $\delta$  8.05 (s, 1H), 7.68 (s, 1H), 7.52 (br d,  $J=8.5$  Hz, 1H), 7.32 (br d,  $J=8.6$  Hz, 1H), 4.51 (s, 2H), 3.58–3.53 (m, 2H), 0.92 (t,  $J=7.9$  Hz, 2H), 0.00 (s, 9H); **LC Method A:** Purity = 100%, Retention Time = 1.99 min.; **Method B:** Purity = 100%, Retention Time = 2.06 min.; **MS (ESI)** 249.13 ( $\text{M} + \text{H}$ ) $^+$ .



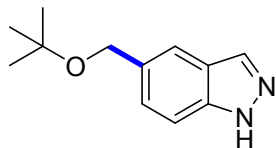

**5-(tert-butoxymethyl)-1H-indazole (104):** 4.7 mg (46% yield);  $^1\text{H NMR}$  (500 MHz, DMSO- $d_6$ )  $\delta$  8.02 (s, 1H), 7.67 (s, 1H), 7.48 (d,  $J=8.3$  Hz, 1H), 7.29 (d,  $J=8.4$  Hz, 1H), 4.47 (s, 2H), 1.24 (s, 9H); **LC Method B:** Purity = 98%, Retention Time = 1.59 min.; **Method A:** Purity = 99%, Retention Time = 1.66 min.; **MS (ESI)** 205.13 (M + H) $^+$ .

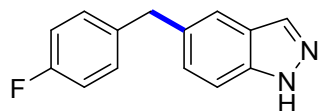

**5-(4-fluorobenzyl)-1H-indazole (106):** 2.8 mg (25% yield);  $^1\text{H NMR}$  (500 MHz, DMSO- $d_6$ )  $\delta$  7.99 (s, 1H), 7.57 (s, 1H), 7.45 (d,  $J=8.5$  Hz, 1H), 7.27 (t,  $J=6.7$  Hz, 2H), 7.21 (d,  $J=8.0$  Hz, 1H), 7.09 (t,  $J=8.9$  Hz, 2H), 4.02 (s, 2H); **LC Method A:** Purity = 100%, Retention Time = 1.71 min.; **Method B:** Purity = 100%, Retention Time = 1.79 min.; **MS (ESI)** 227.09 (M + H) $^+$ .

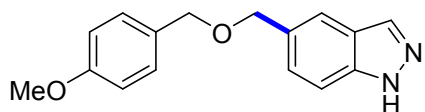

**5-(((4-methoxybenzyl)oxy)methyl)-1H-indazole (107):** 3.6 mg (28% yield);  $^1\text{H NMR}$  (500 MHz, DMSO- $d_6$ )  $\delta$  8.05 (s, 1H), 7.71 (s, 1H), 7.52 (d,  $J=8.5$  Hz, 1H), 7.34 (d,  $J=8.5$  Hz, 1H), 7.28 (d,  $J=8.6$  Hz, 2H), 6.92 (d,  $J=7.6$  Hz, 2H), 4.57 (s, 2H), 4.45 (s, 2H), 3.74 (s, 3H); **LC Method A:** Purity = 100%, Retention Time = 1.58 min.; **Method B:** Purity = 100%, Retention Time = 1.67 min.; **MS (ESI)** 269.12 (M + H) $^+$ .

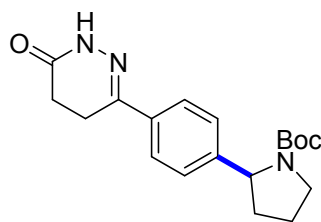

**Tert-butyl 2-(4-(6-oxo-1,4,5,6-tetrahydropyridazin-3-yl)phenyl)pyrrolidine-1-carboxylate (122):** 11.7 mg (68% yield);  $^1\text{H NMR}$  (500 MHz, DMSO- $d_6$ )  $\delta$  10.88 (s, 1H), 7.75–7.64 (m, 2H), 7.21 (br d,  $J=7.9$  Hz, 2H), 2.94 (t,  $J=8.2$  Hz, 2H), 2.44 (br t,  $J=8.2$  Hz, 2H), 2.31 (br s, 1H), 1.81 (br d,  $J=6.3$  Hz, 2H), 1.69 (br s, 1H), 1.39 (br s, 3H), 1.11 (br s, 9H); **LC-MS Method A:** Purity = 100%, Retention Time = 1.74 min.; **Method B:** Purity = 100%, Retention Time = 1.77 min.; **MS (ESI)** 344.19 (M + H) $^+$ .

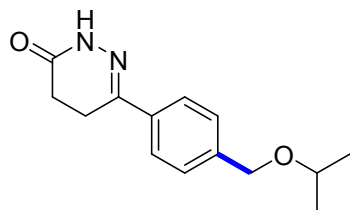

**6-(4-(isopropoxymethyl)phenyl)-4,5-dihydropyridazin-3(2H)-one (123):** 7.8 mg (63% yield);  $^1\text{H NMR}$  (500 MHz,  $\text{DMSO-}d_6$ )  $\delta$  10.90 (s, 1H), 7.75–7.70 (m,  $J=8.2$  Hz, 2H), 7.40–7.34 (m,  $J=8.3$  Hz, 2H), 4.49 (s, 2H), 3.64 (dt,  $J=12.2, 6.1$  Hz, 1H), 2.94 (t,  $J=8.3$  Hz, 2H), 2.50–2.42 (m, 2H), 1.15 (d,  $J=6.1$  Hz, 6H); LC Method A: Purity = 100%, Retention Time = 1.54 min.; Method B: Purity = 100%, Retention Time = 1.57 min.; **MS (ESI)** 247.14 (M + H) $^+$ .

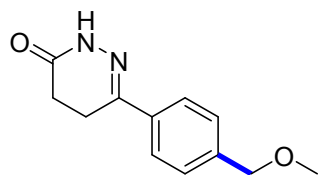

**6-(4-(methoxymethyl)phenyl)-4,5-dihydropyridazin-3(2H)-one (124):** 6.9 mg (63% yield);  $^1\text{H NMR}$  (500 MHz,  $\text{DMSO-}d_6$ )  $\delta$  10.93 (s, 1H), 7.76 (d,  $J=8.2$  Hz, 2H), 7.39 (d,  $J=8.2$  Hz, 2H), 4.46 (s, 2H), 2.97 (t,  $J=8.2$  Hz, 2H), 2.53 (s, 3H), 2.51–2.44 (m, 2H); LC Method A: Purity = 100%, Retention Time = 1.23 min.; Method B: Purity = 96%, Retention Time = 1.16 min.; **MS (ESI)** 219.11 (M + H) $^+$ .

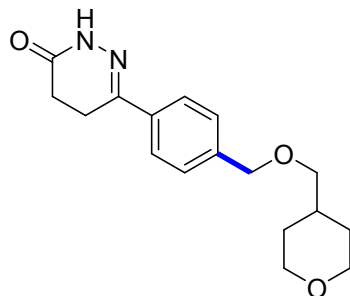

**6-(4-(((tetrahydro-2H-pyran-4-yl)methoxy)methyl)phenyl)-4,5-dihydropyridazin-3(2H)-one (125):** 3.8 mg (25% yield);  $^1\text{H NMR}$  (500 MHz,  $\text{DMSO-}d_6$ )  $\delta$  10.90 (s, 1H), 7.78–7.68 (m,  $J=8.3$  Hz, 2H), 7.43–7.31 (m,  $J=8.2$  Hz, 2H), 4.49 (s, 2H), 3.83 (br dd,  $J=11.3, 2.9$  Hz, 2H), 2.95 (t,  $J=8.3$  Hz, 2H), 2.49–2.40 (m, 2H), 1.91–1.74 (m, 1H), 1.59 (br d,  $J=12.4$  Hz, 2H), 1.28–1.15 (m, 2H); LC Method A: Purity = 100%, Retention Time = 1.45 min.; Method B: Purity = 100%, Retention Time = 1.48 min.; **MS (ESI)** 303.16 (M + H) $^+$ .

# Spectral Data

$^1\text{H}$  NMR (DMSO- $d_6$ , 500 MHz) of **45**

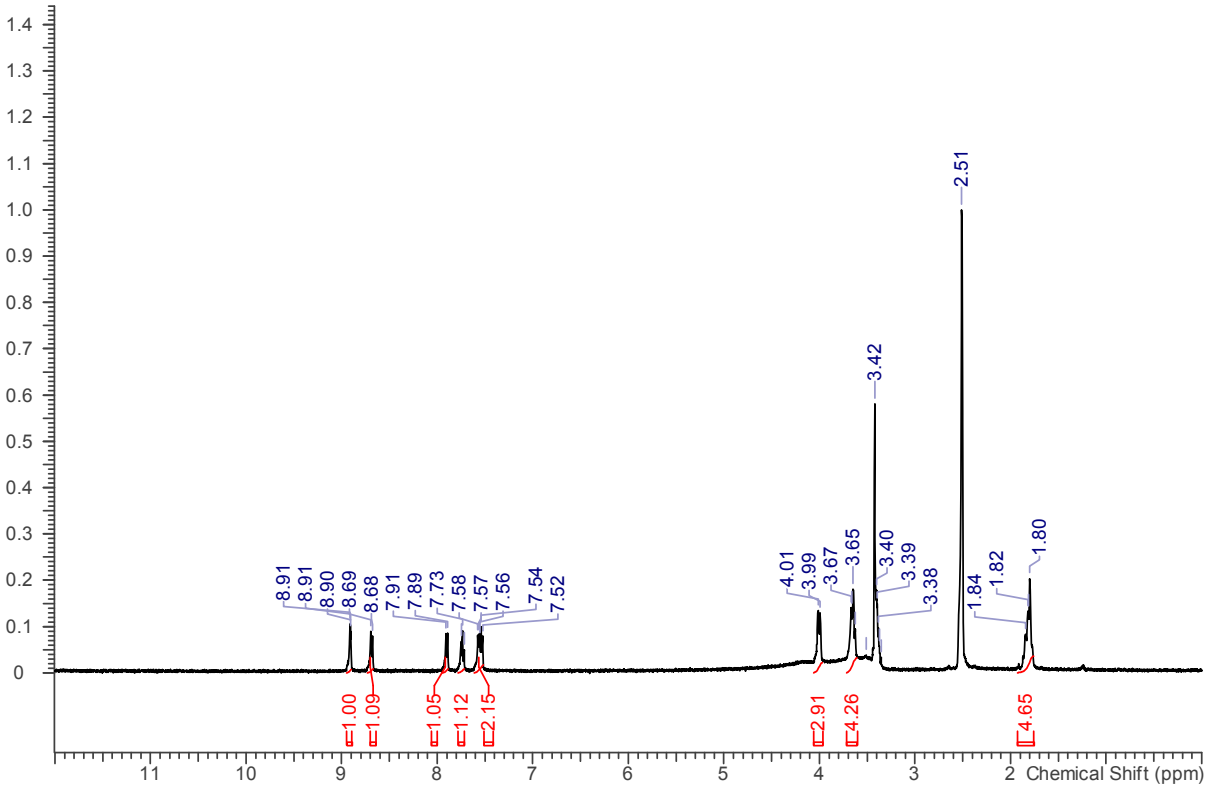

LC-MS (Injection 1: MeCN:H<sub>2</sub>O with 0.1% TFA) of **45**

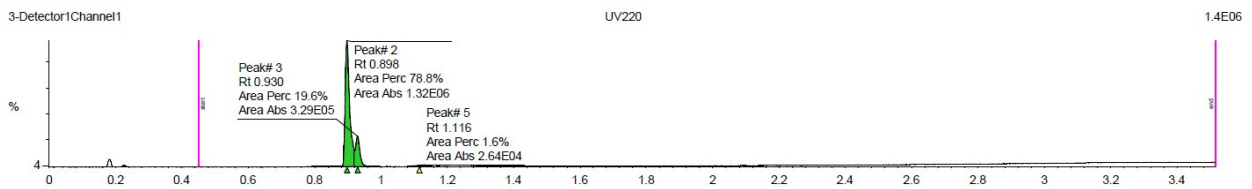

LC-MS (Injection 2: MeCN:H<sub>2</sub>O with 10 mM ammonium acetate) of **45**

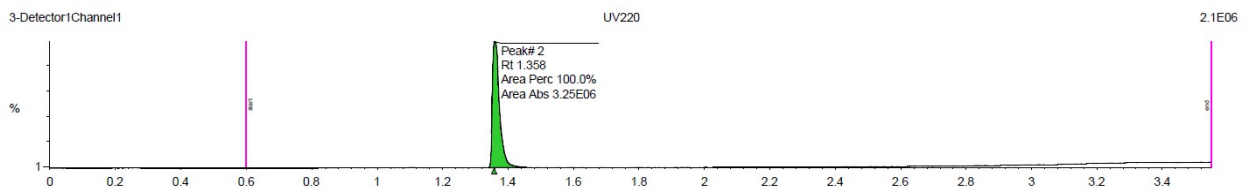

$^1\text{H}$  NMR (DMSO- $d_6$ , 500 MHz) of **48**

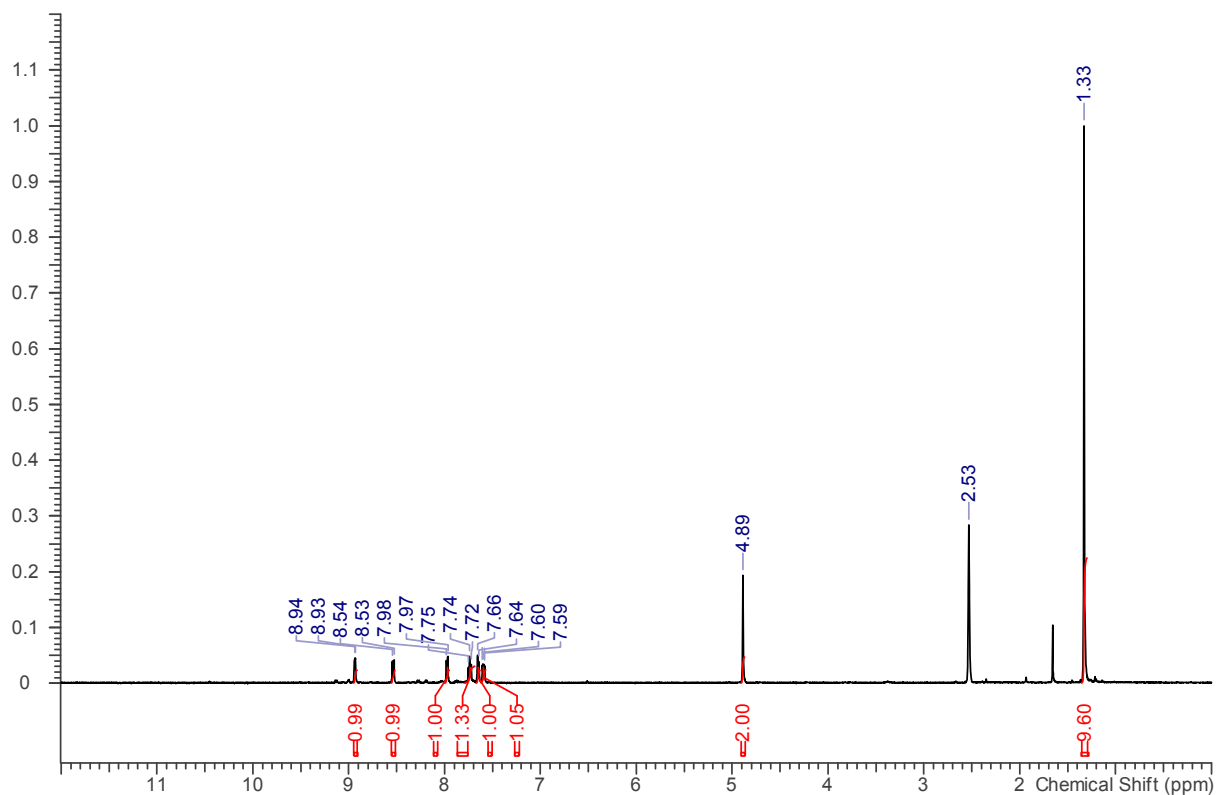

LC-MS (Injection 1: MeCN:H<sub>2</sub>O with 0.1% TFA) of **48**

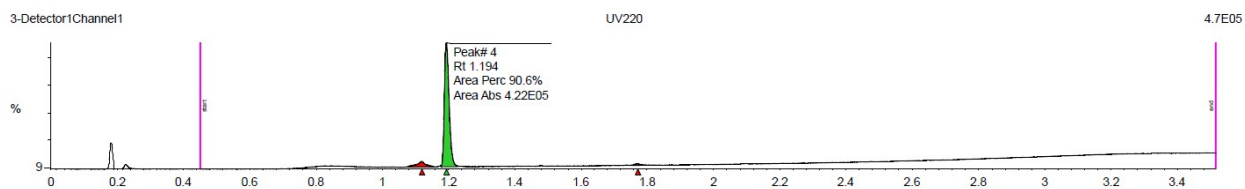

LC-MS (Injection 2: MeCN:H<sub>2</sub>O with 10 mM ammonium acetate) of **48**

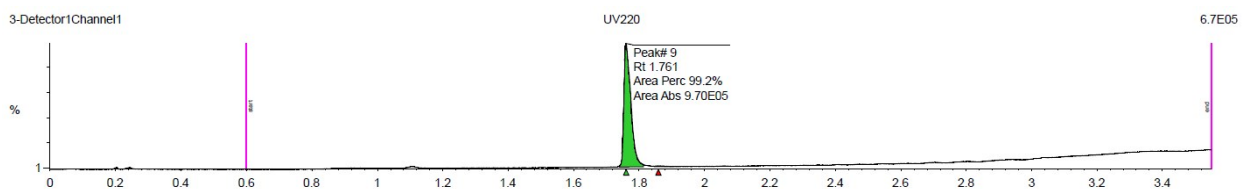

$^1\text{H}$  NMR (DMSO- $d_6$ , 500 MHz) of **51**

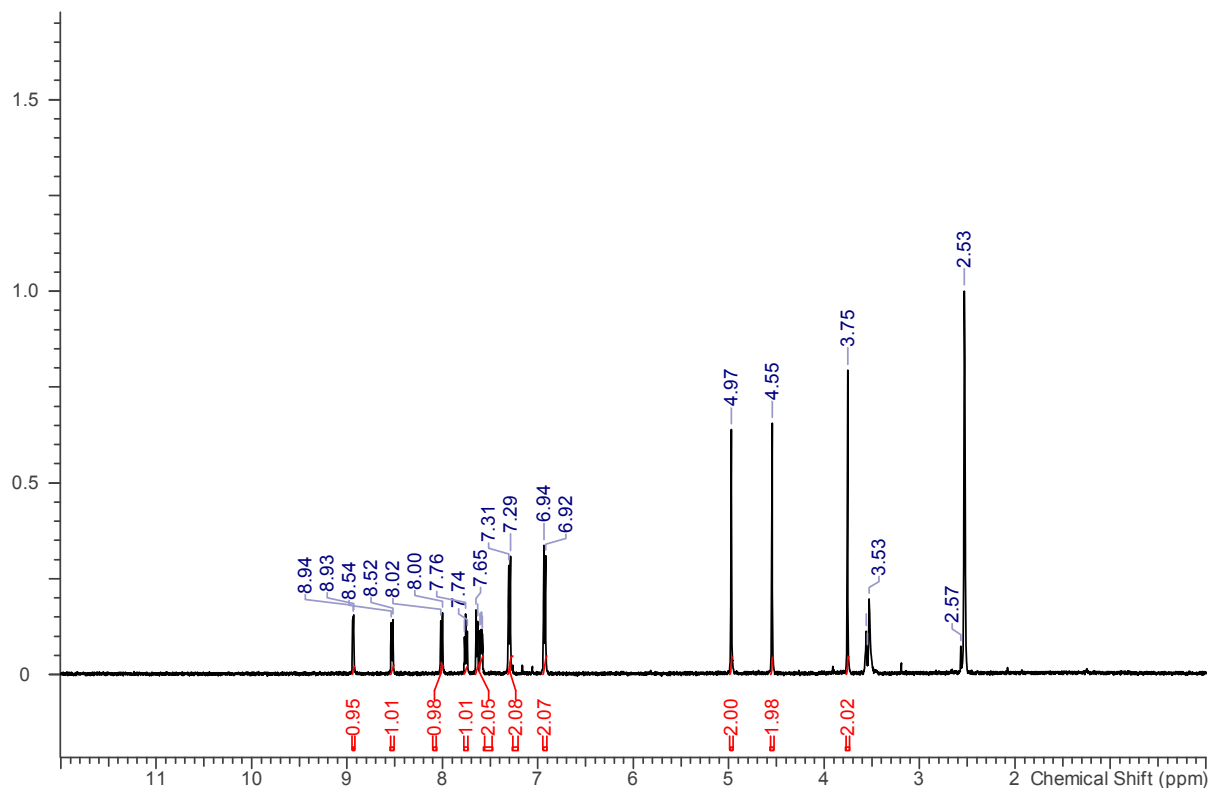

LC-MS (Injection 1: MeCN:H<sub>2</sub>O with 10 mM ammonium acetate) of **51**

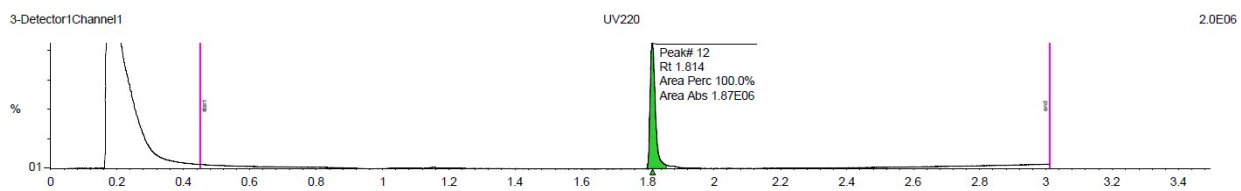

LC-MS (Injection 2: MeCN:H<sub>2</sub>O with 0.1% TFA) of **51**

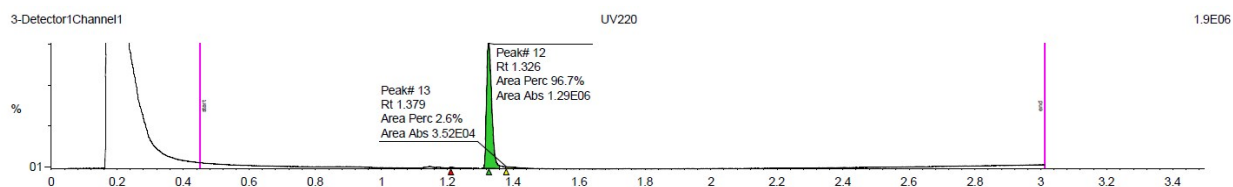

$^1\text{H}$  NMR (DMSO- $d_6$ , 500 MHz) of **52**

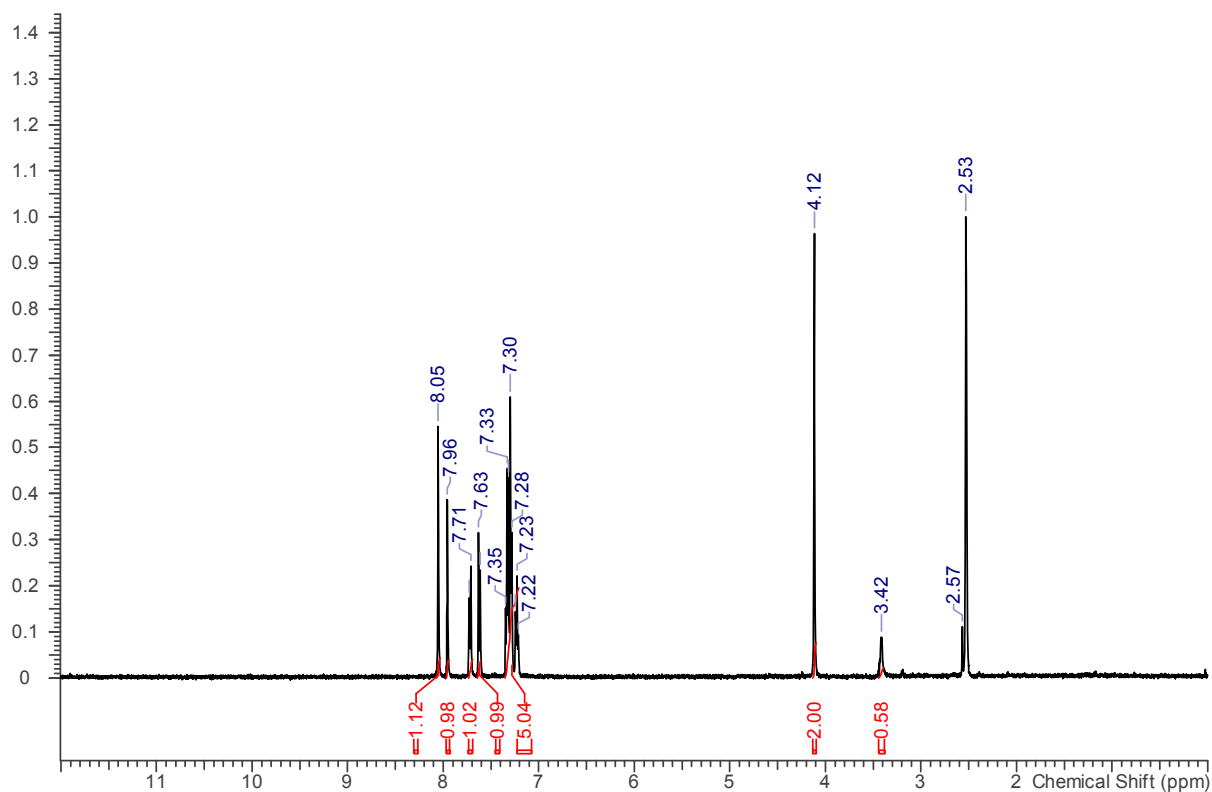

LC-MS (Injection 1: MeCN:H<sub>2</sub>O with 10 mM ammonium acetate) of **52**

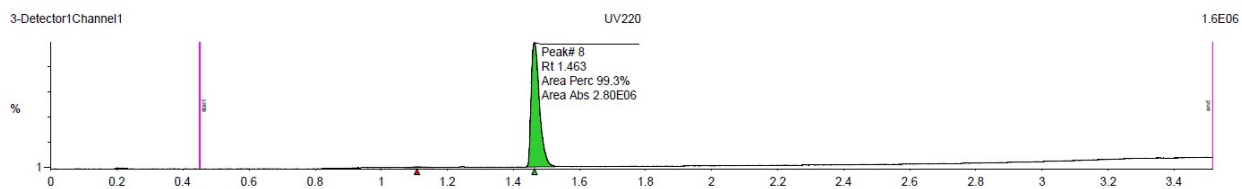

LC-MS (Injection 2: MeCN:H<sub>2</sub>O with 0.1% TFA) of **52**

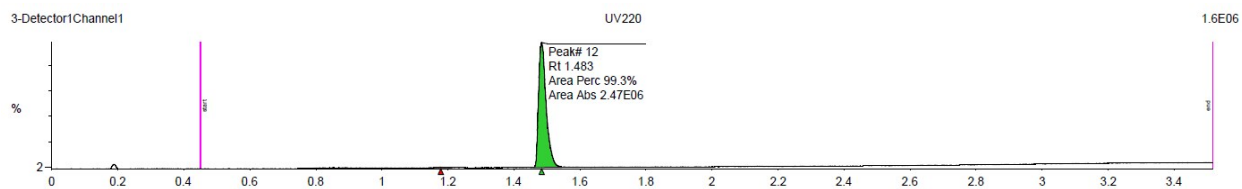

<sup>1</sup>H NMR (DMSO-*d*<sub>6</sub>, 500 MHz) of **53**

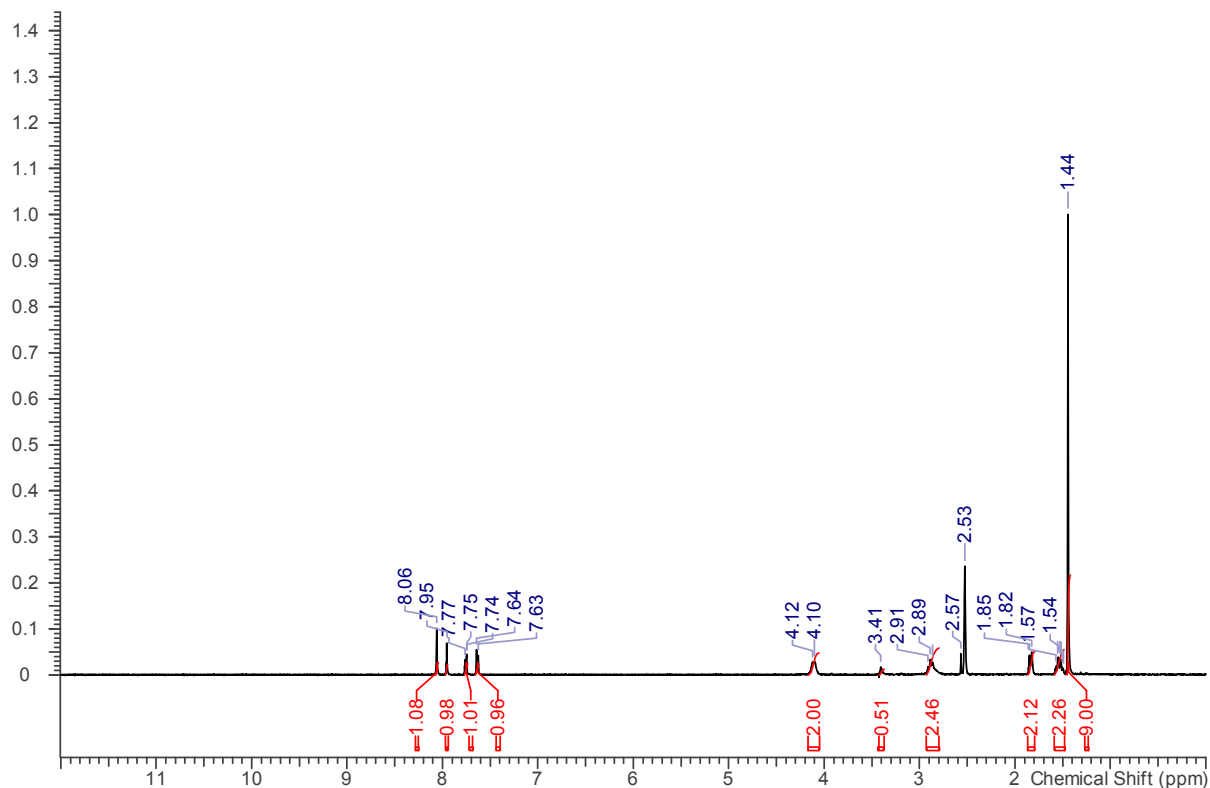

LC-MS (Injection 1: MeCN:H<sub>2</sub>O with 10 mM ammonium acetate) of **53**

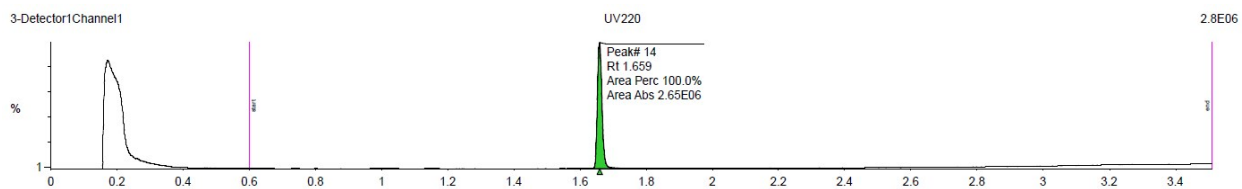

LC-MS (Injection 2: MeCN:H<sub>2</sub>O with 0.1% TFA) of **53**

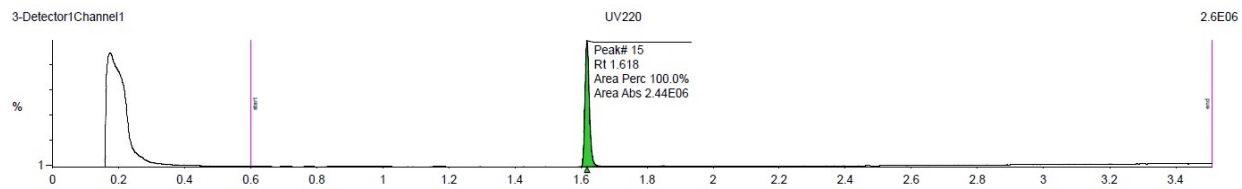

$^1\text{H}$  NMR (DMSO- $d_6$ , 500 MHz) of **54**

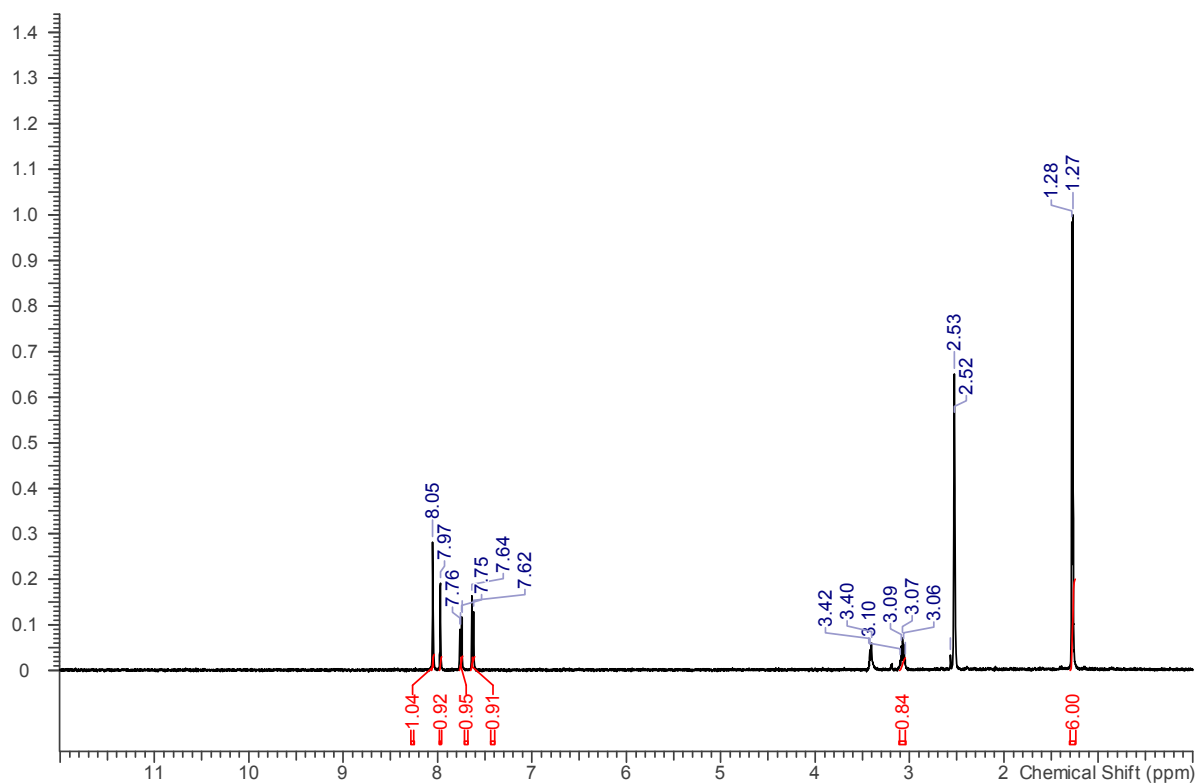

LC-MS (Injection 1: MeCN:H<sub>2</sub>O with 0.1% TFA) of **54**

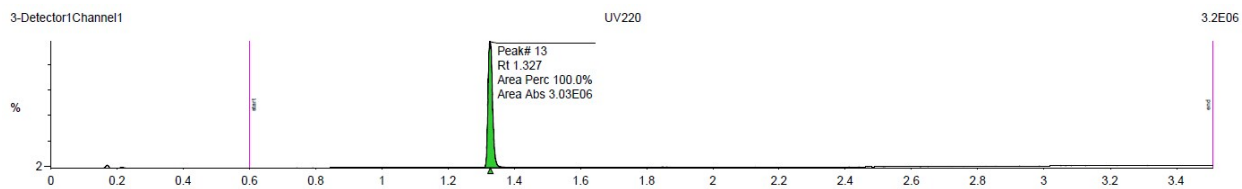

LC-MS (Injection 2: MeCN:H<sub>2</sub>O with 10 mM ammonium acetate) of **54**

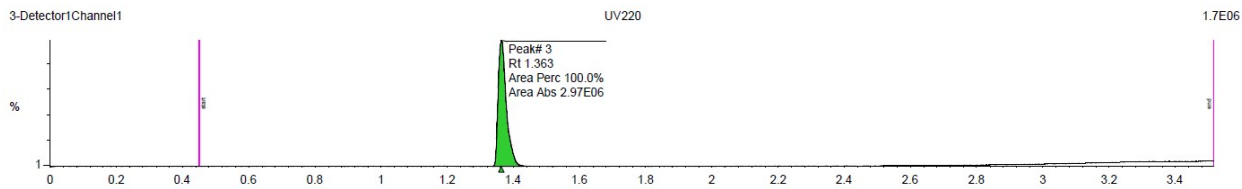



$^1\text{H}$  NMR (DMSO- $d_6$ , 500 MHz) of **55**

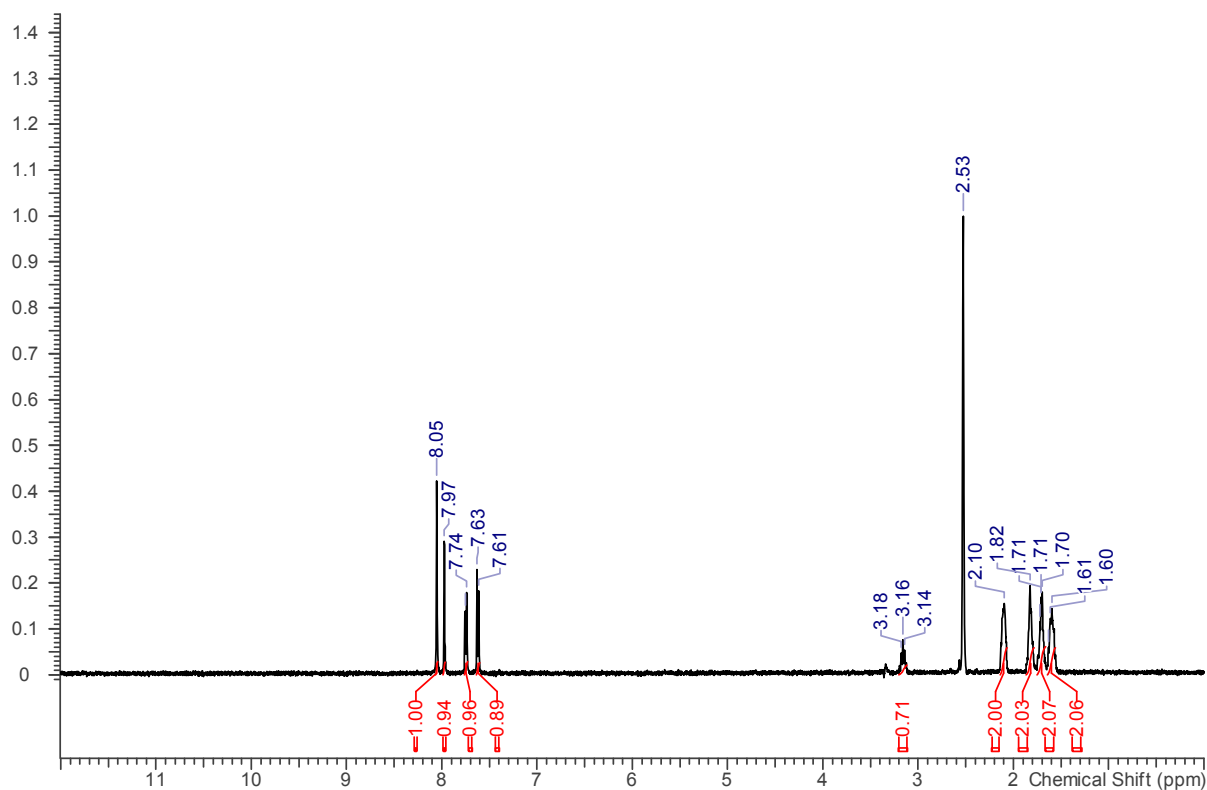

LC-MS (Injection 1: MeCN:H $_2$ O with 10 mM ammonium acetate) of **55**

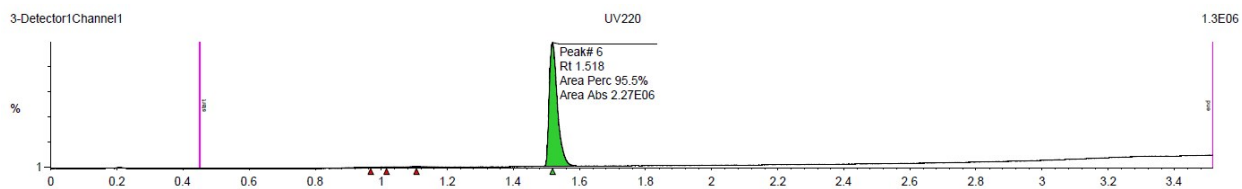

LC-MS (Injection 2: MeCN:H $_2$ O with 0.1% TFA) of **55**

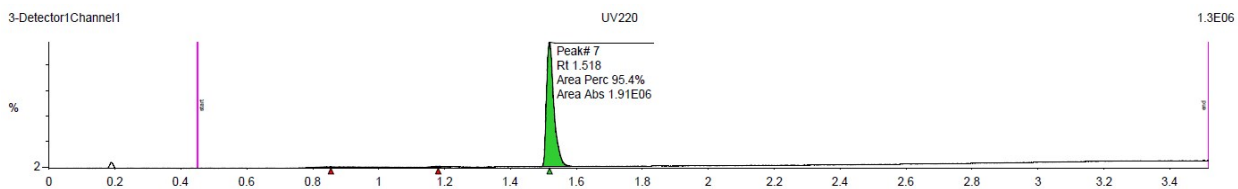

<sup>1</sup>H NMR (DMSO-*d*<sub>6</sub>, 500 MHz) of **56**

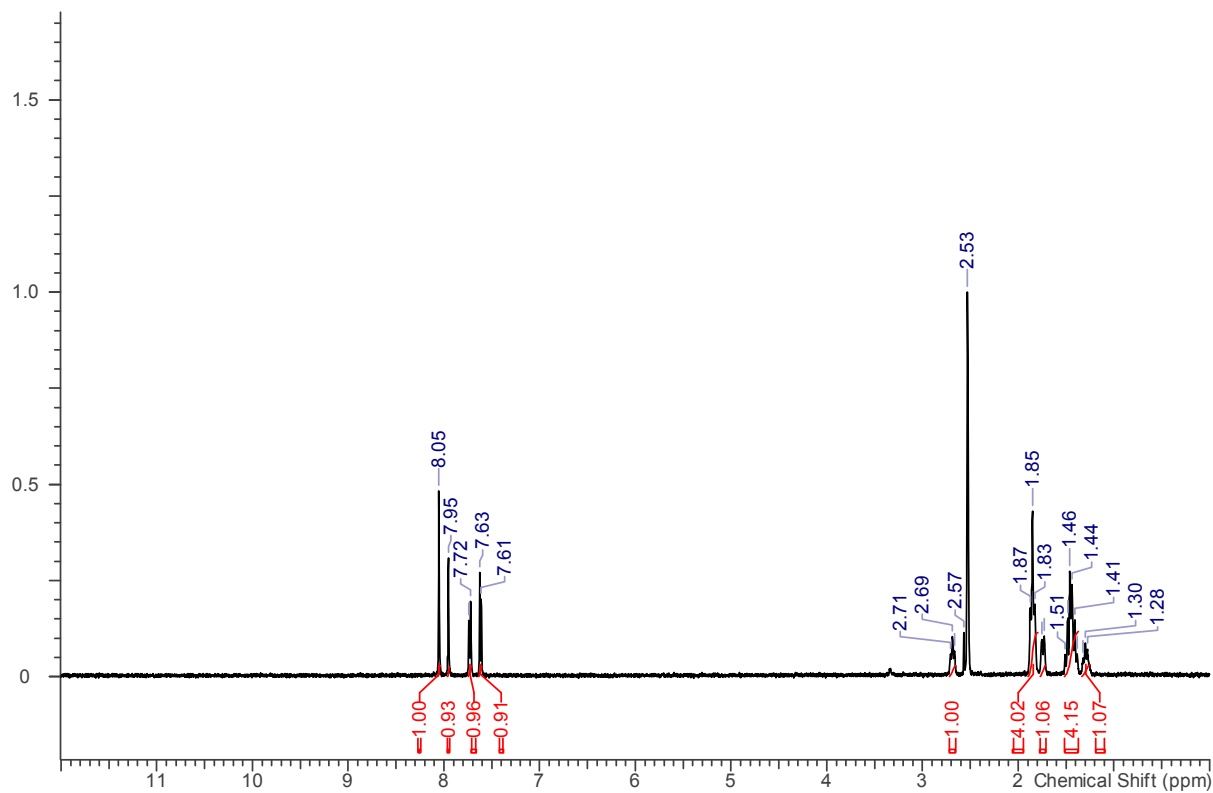

LC-MS (Injection 1: MeCN:H<sub>2</sub>O with 10 mM ammonium acetate) of **56**

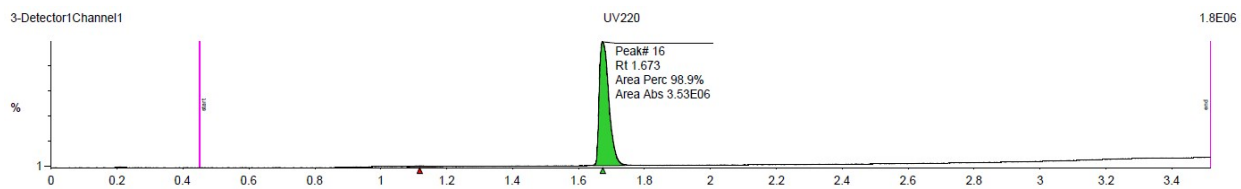

LC-MS (Injection 2: MeCN:H<sub>2</sub>O with 0.1% TFA) of **56**

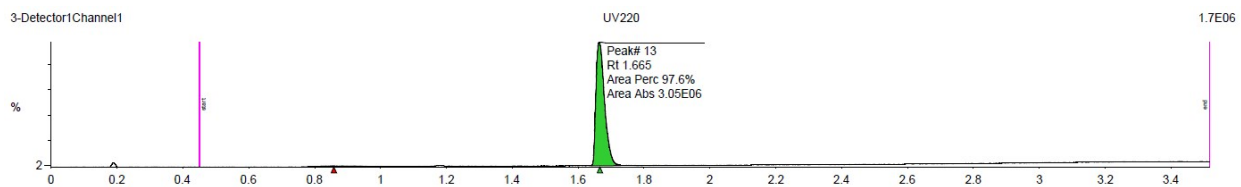

<sup>1</sup>H NMR (DMSO-*d*<sub>6</sub>, 500 MHz) of **57**

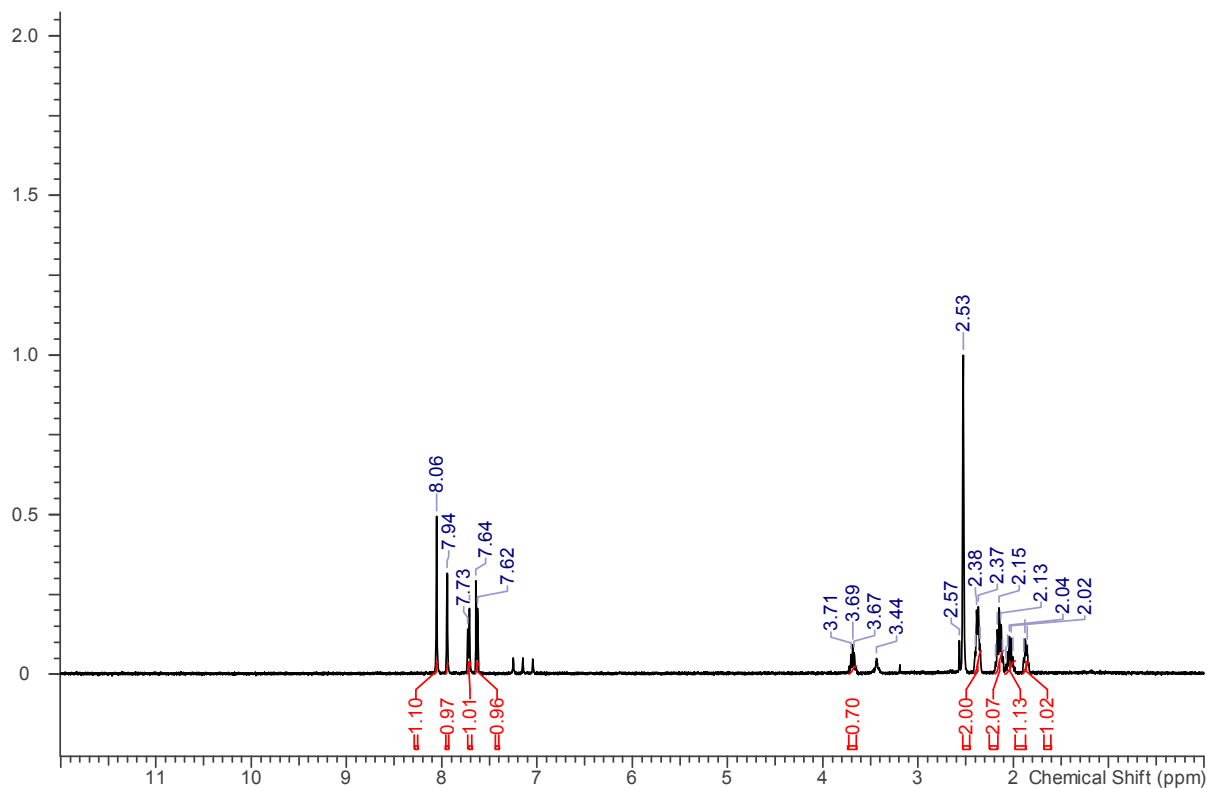

LC-MS (Injection 1: MeCN:H<sub>2</sub>O with 10 mM ammonium acetate) of **57**

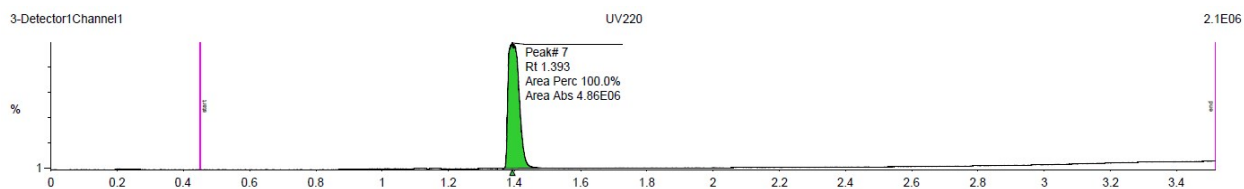

LC-MS (Injection 2: MeCN:H<sub>2</sub>O with 0.1% TFA) of **57**

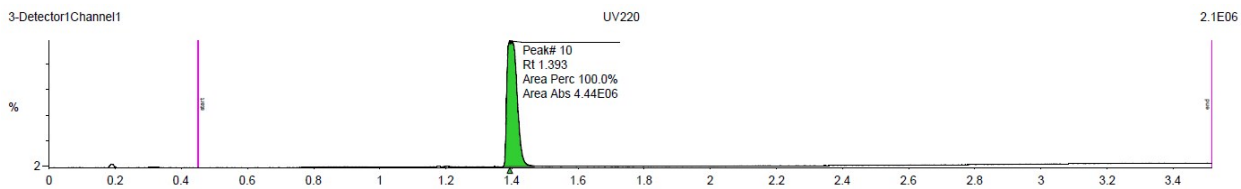

<sup>1</sup>H NMR (DMSO-*d*<sub>6</sub>, 500 MHz) of **59**

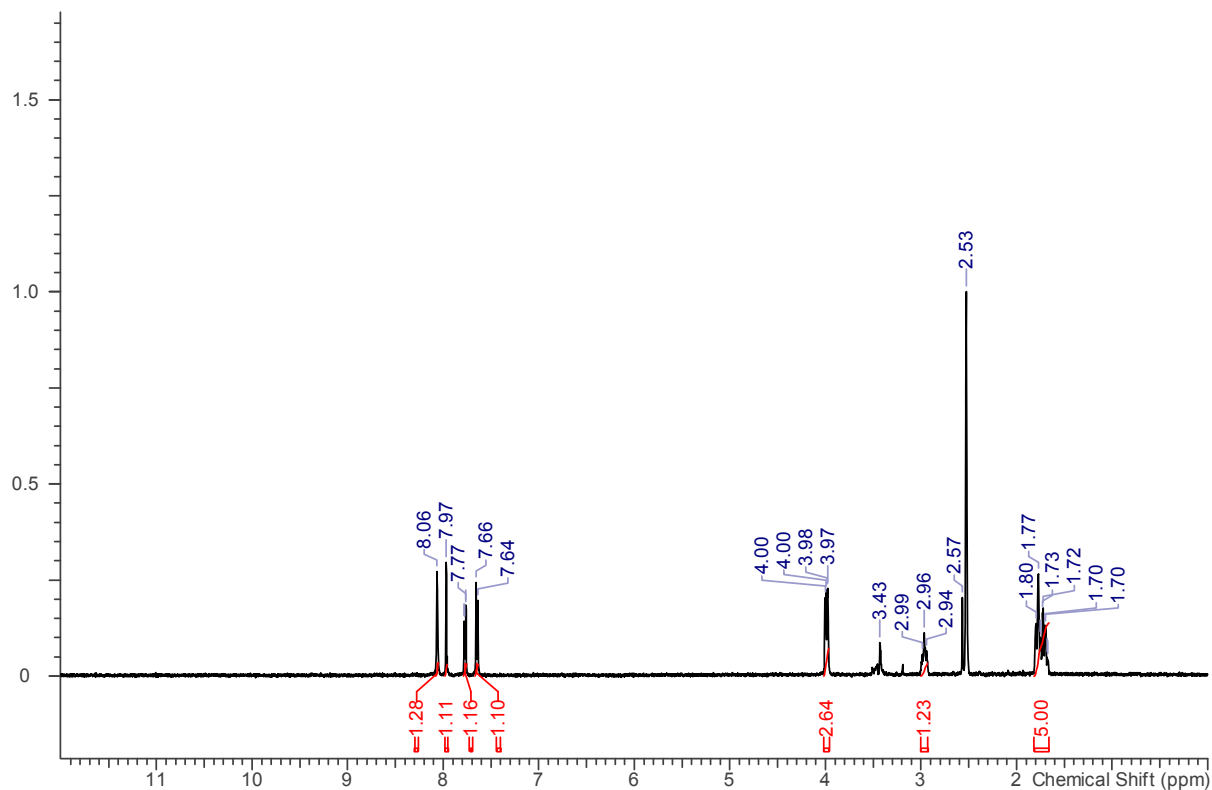

LC-MS (Injection 1: MeCN:H<sub>2</sub>O with 10 mM ammonium acetate) of **59**

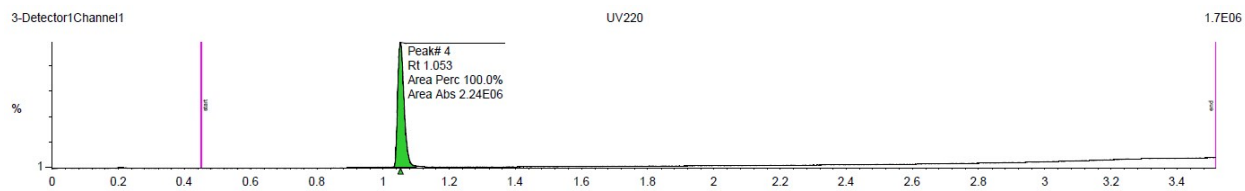

LC-MS (Injection 2: MeCN:H<sub>2</sub>O with 0.1% TFA) of **59**

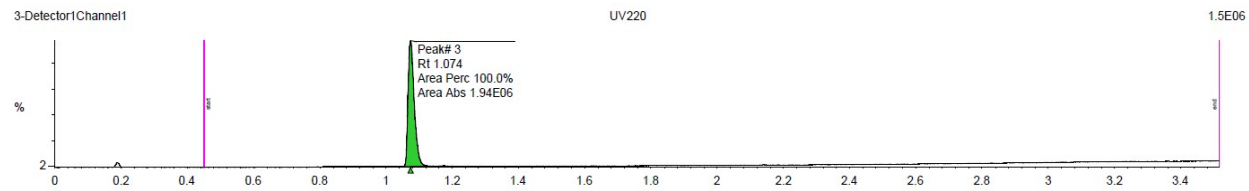

<sup>1</sup>H NMR (DMSO-*d*<sub>6</sub>, 500 MHz) of **60**

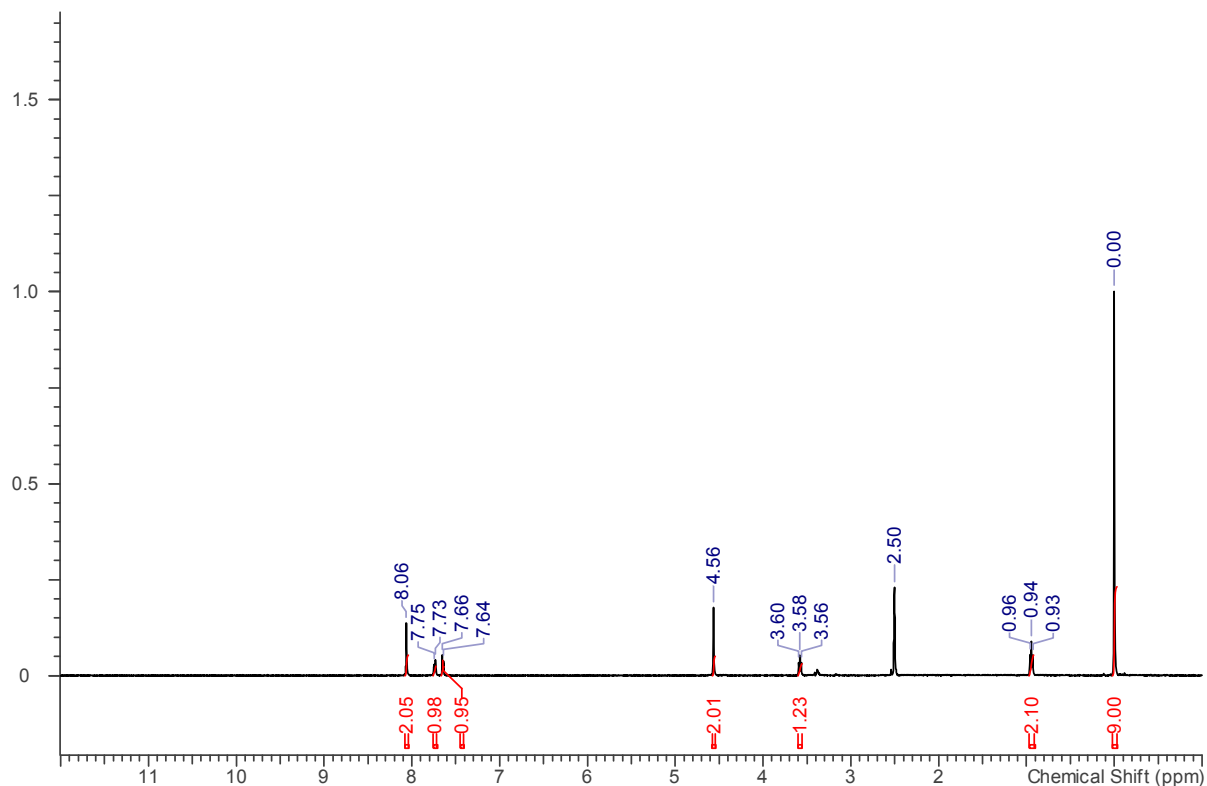

LC-MS (Injection 1: MeCN:H<sub>2</sub>O with 10 mM ammonium acetate) of **60**

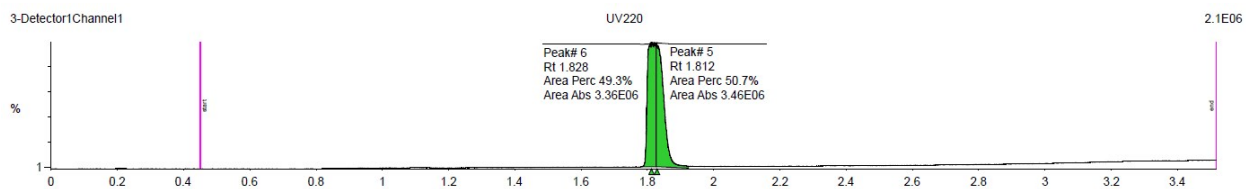

LC-MS (Injection 2: MeCN:H<sub>2</sub>O with 0.1% TFA) of **60**

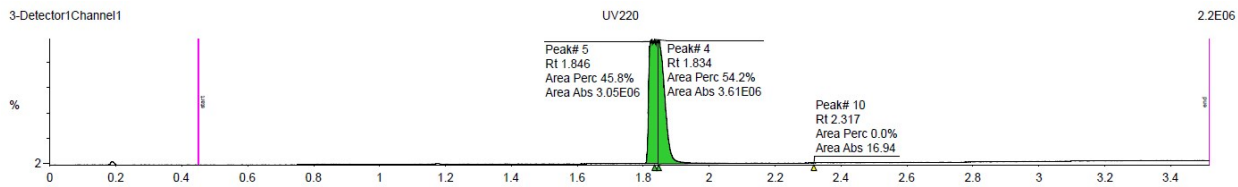

$^1\text{H}$  NMR (DMSO- $d_6$ , 500 MHz) of **61**

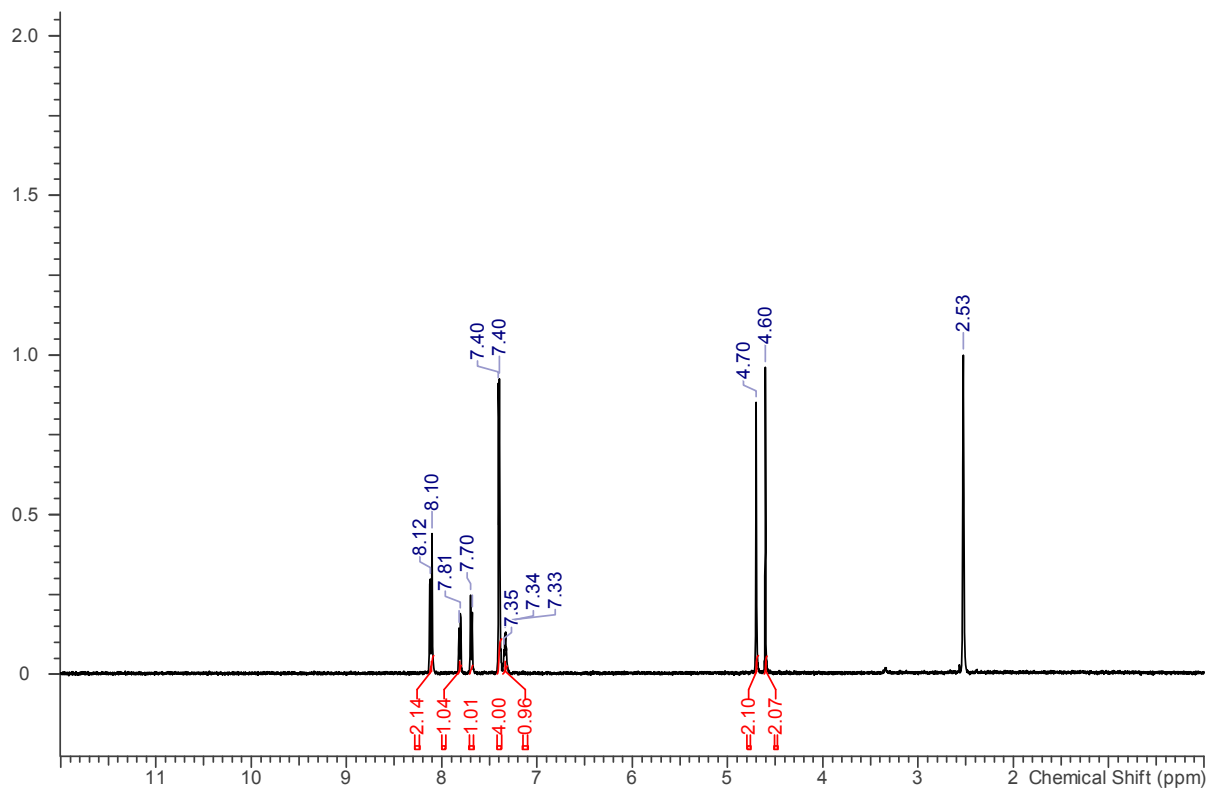

LC-MS (Injection 1: MeCN:H<sub>2</sub>O with 10 mM ammonium acetate) of **61**

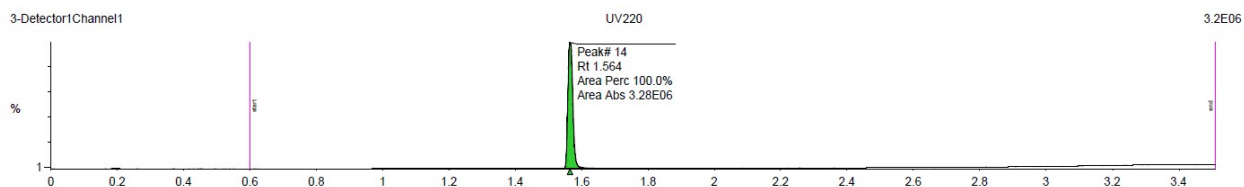

LC-MS (Injection 2: MeCN:H<sub>2</sub>O with 0.1% TFA) of **61**

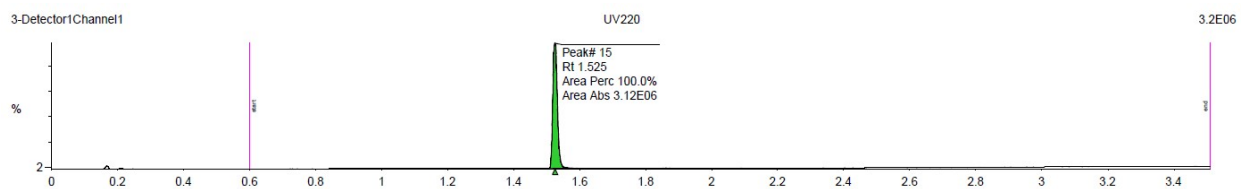

$^1\text{H}$  NMR (DMSO- $d_6$ , 500 MHz) of **62**

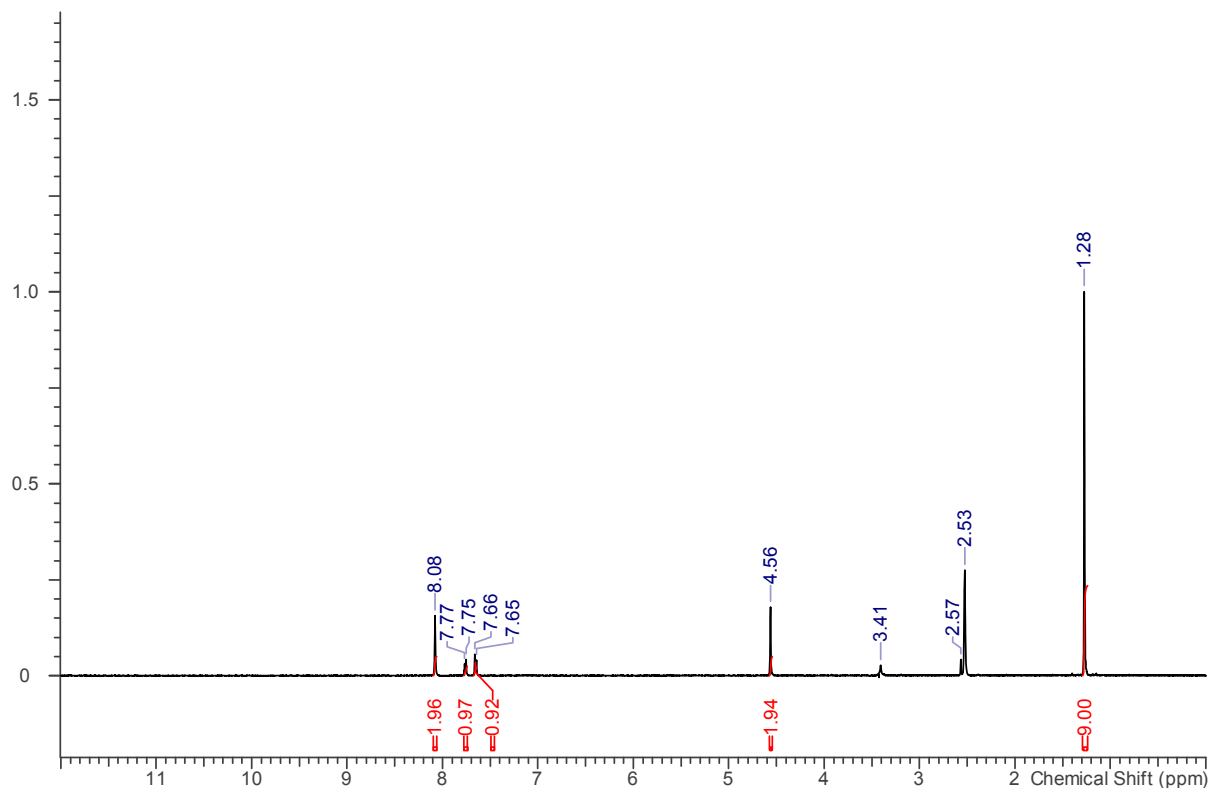

LC-MS (Injection 1: MeCN:H $_2$ O with 10 mM ammonium acetate) of **62**

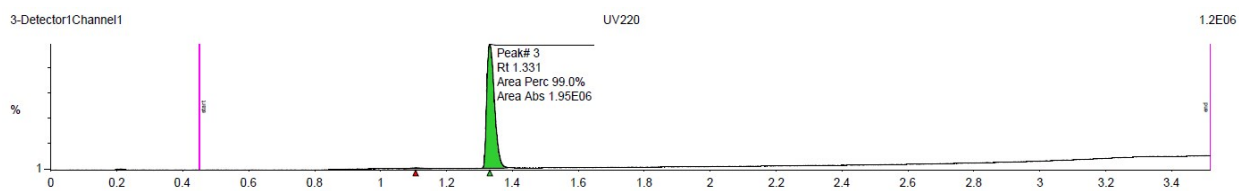

LC-MS (Injection 2: MeCN:H $_2$ O with 0.1% TFA) of **62**

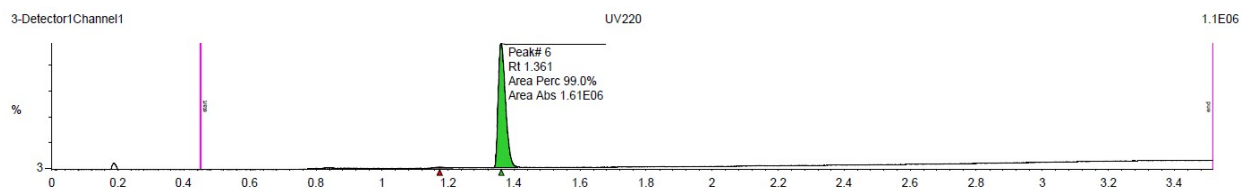

$^1\text{H}$  NMR (DMSO- $d_6$ , 500 MHz) of **63**

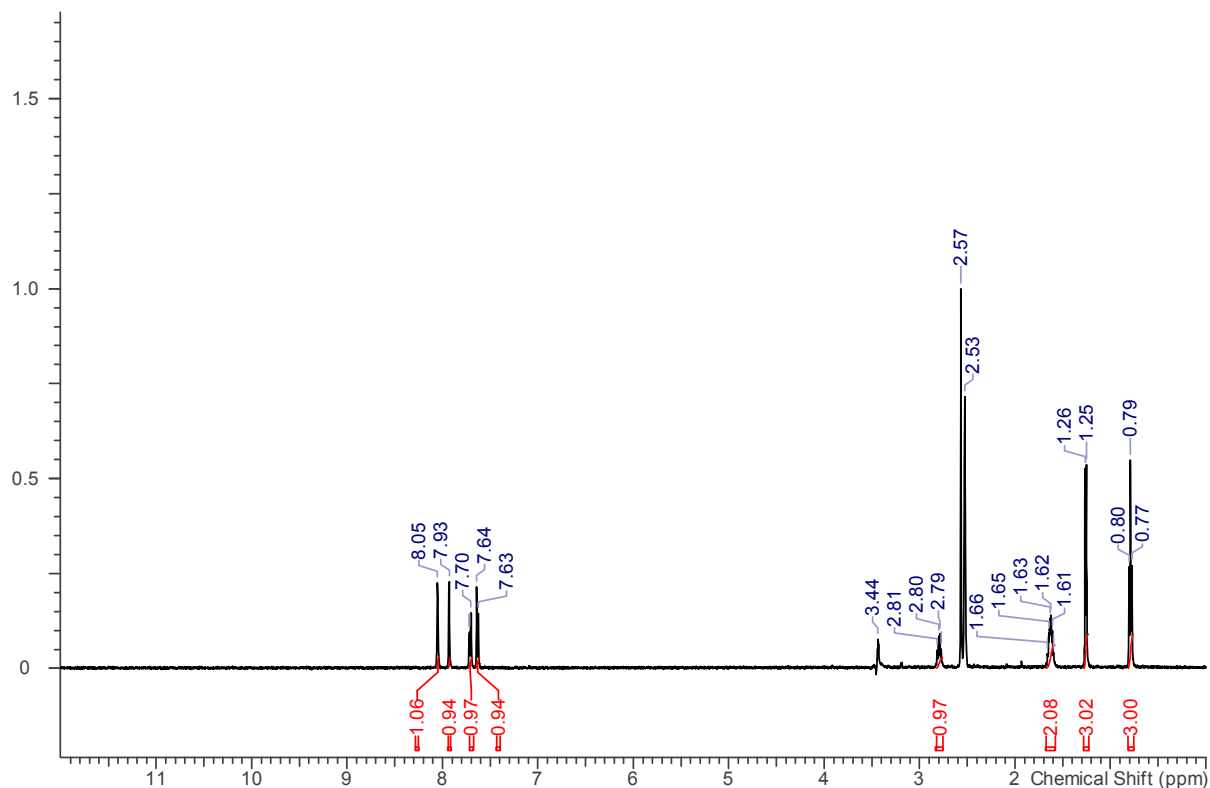

LC-MS (Injection 1: MeCN:H<sub>2</sub>O with 10 mM ammonium acetate) of **63**

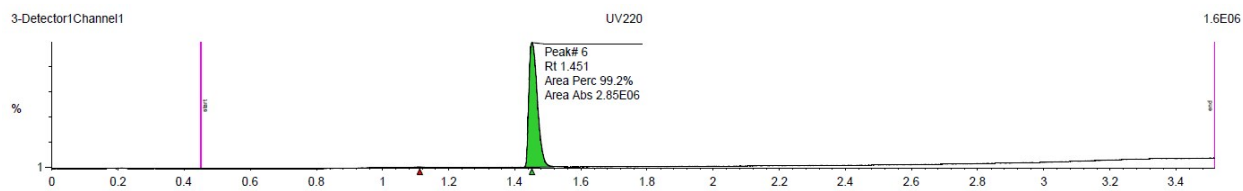

LC-MS (Injection 2: MeCN:H<sub>2</sub>O with 0.1% TFA) of **63**

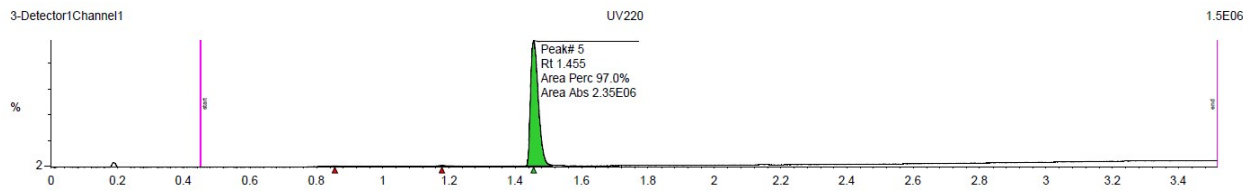



$^1\text{H}$  NMR (DMSO- $d_6$ , 500 MHz) of **64**

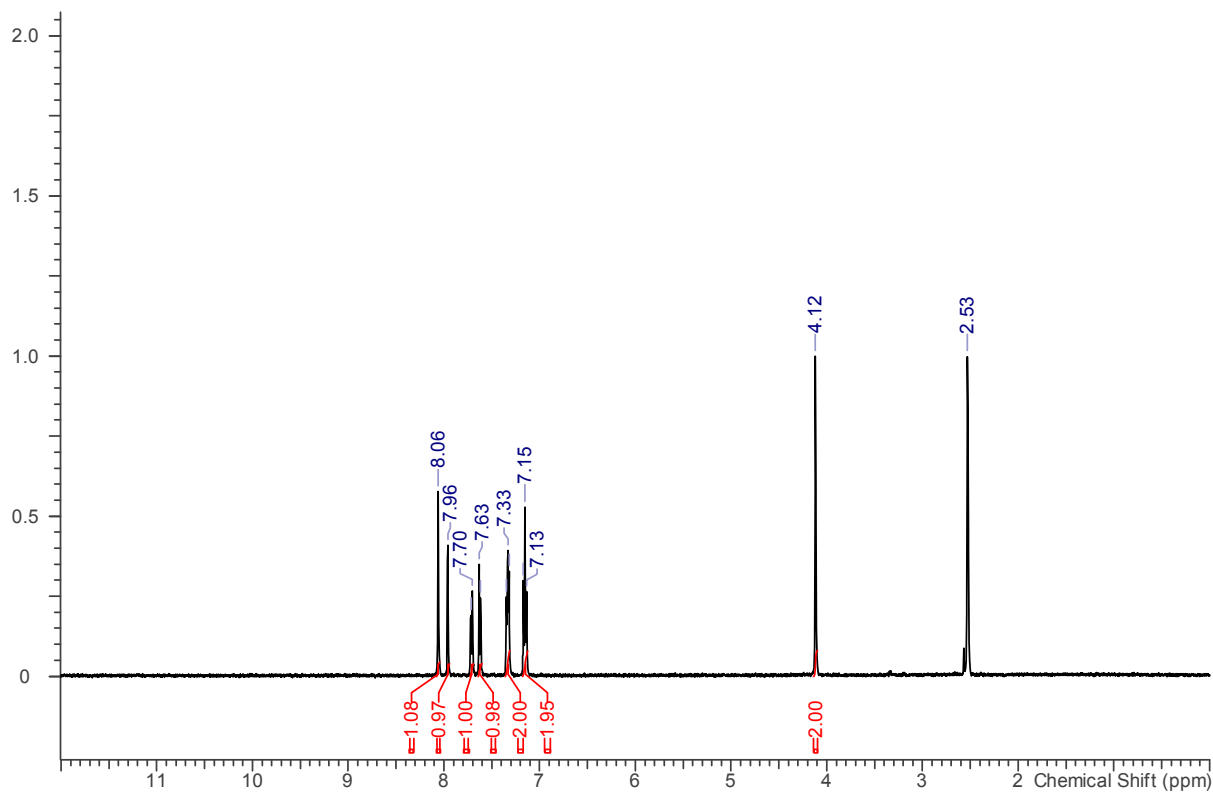

LC-MS (Injection 1: MeCN:H<sub>2</sub>O with 10 mM ammonium acetate) of **64**

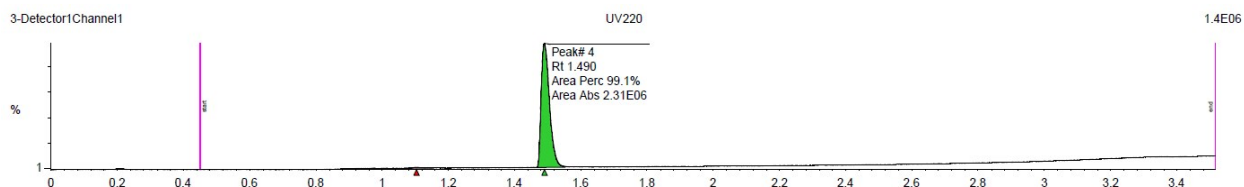

LC-MS (Injection 2: MeCN:H<sub>2</sub>O with 0.1% TFA) of **64**

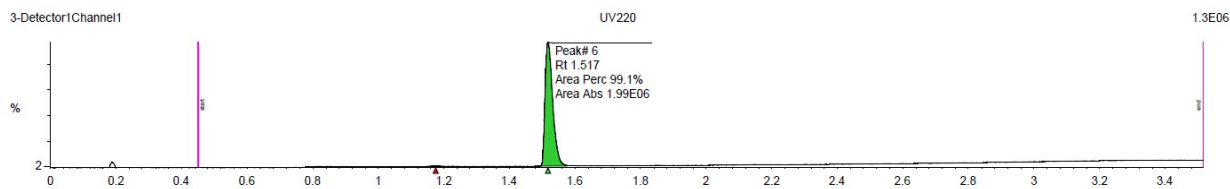

$^1\text{H}$  NMR (DMSO- $d_6$ , 500 MHz) of **65**

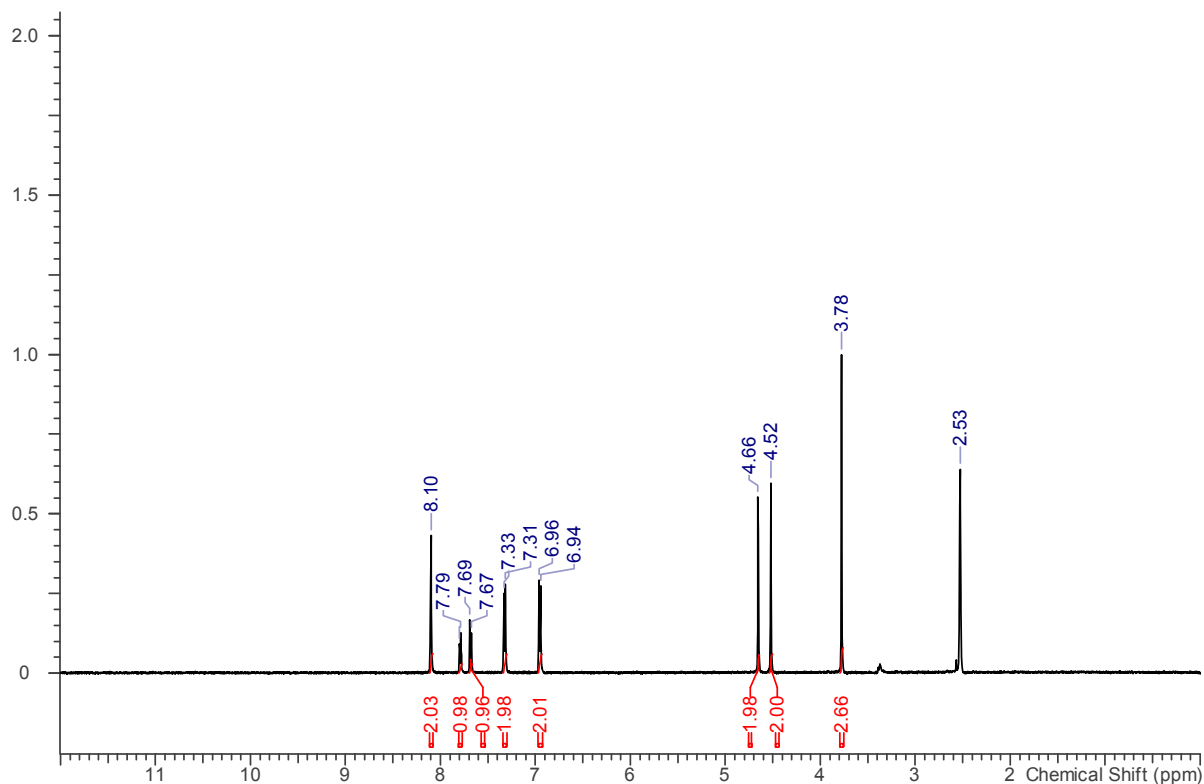

LC-MS (Injection 1: MeCN:H $_2$ O with 10 mM ammonium acetate) of **65**

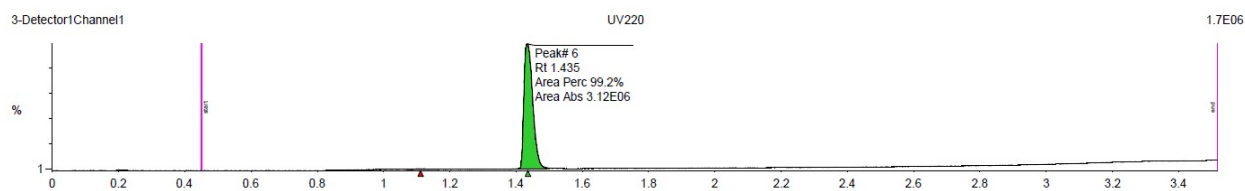

LC-MS (Injection 2: MeCN:H $_2$ O with 0.1% TFA) of **65**

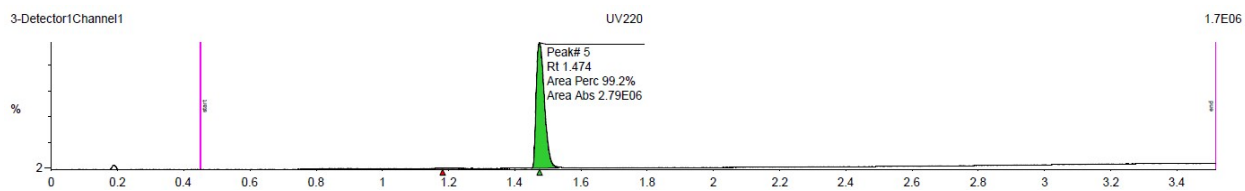

$^1\text{H}$  NMR (DMSO- $d_6$ , 500 MHz) of **80**

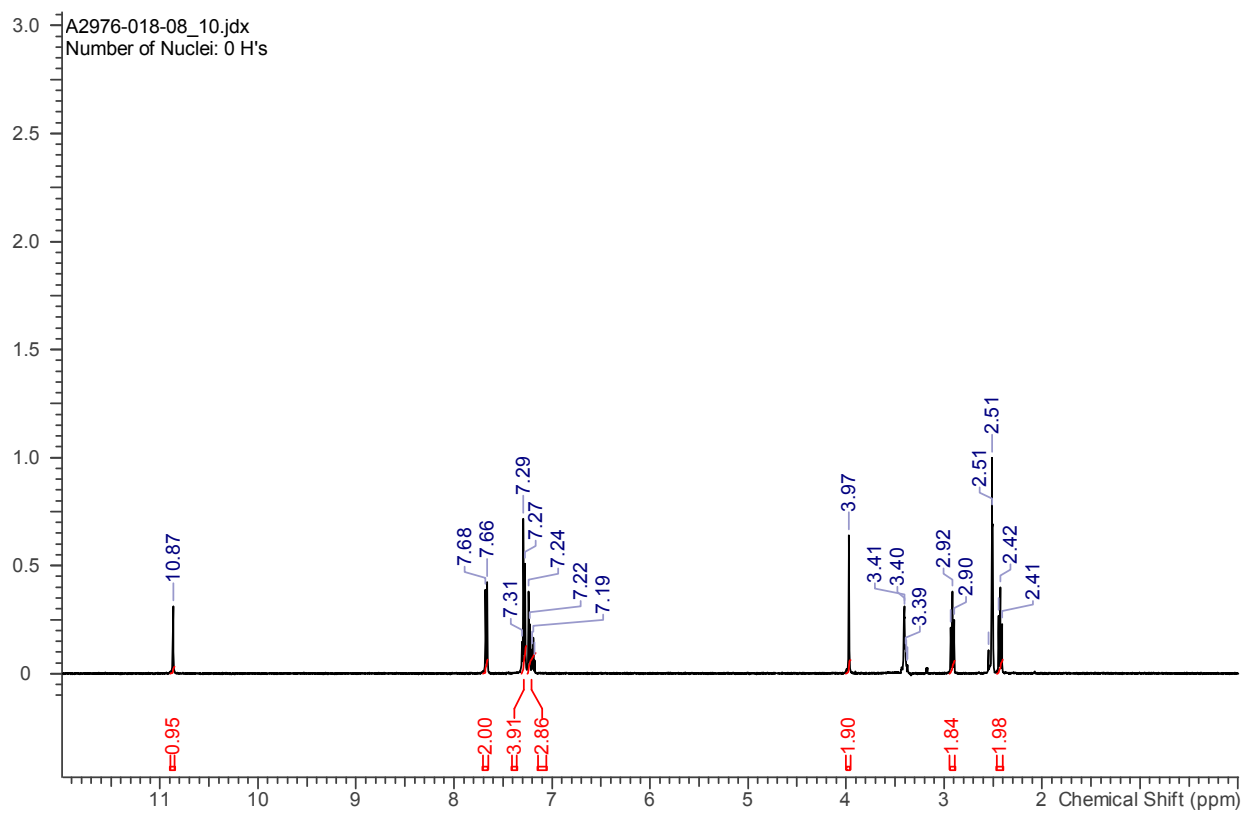

LC-MS (Injection 1: MeCN:H<sub>2</sub>O with 0.1% TFA) of **80**

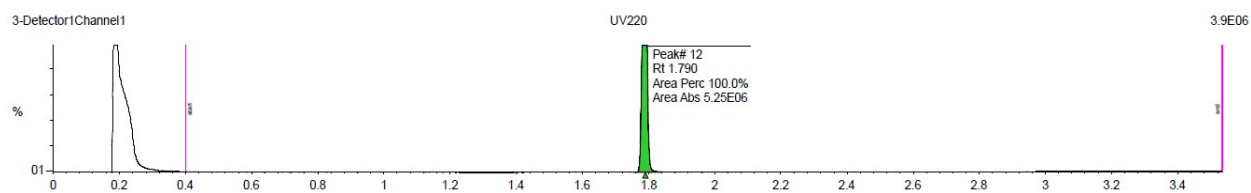

LC-MS (Injection 2: MeCN:H<sub>2</sub>O with 10 mM ammonium acetate) of **80**

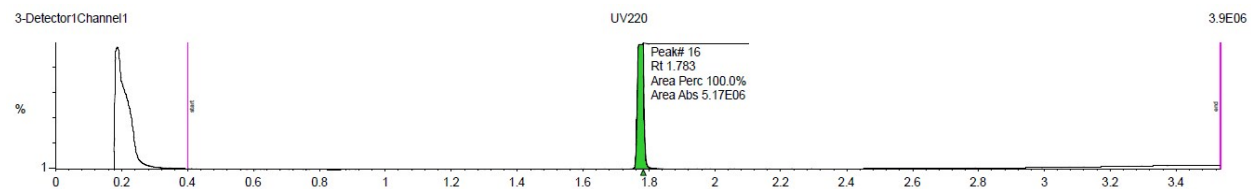

$^1\text{H}$  NMR (DMSO- $d_6$ , 500 MHz) of **81**

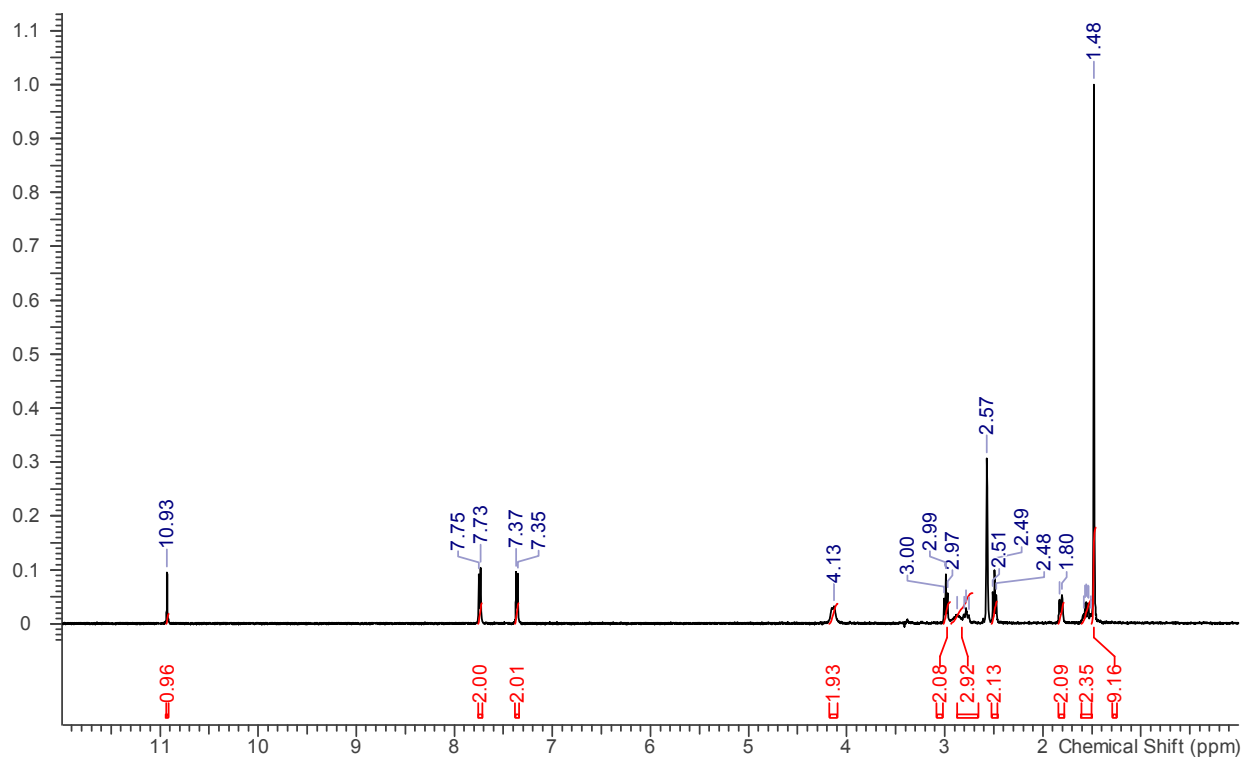

LC-MS (Injection 1: MeCN:H<sub>2</sub>O with 0.1% TFA) of **81**

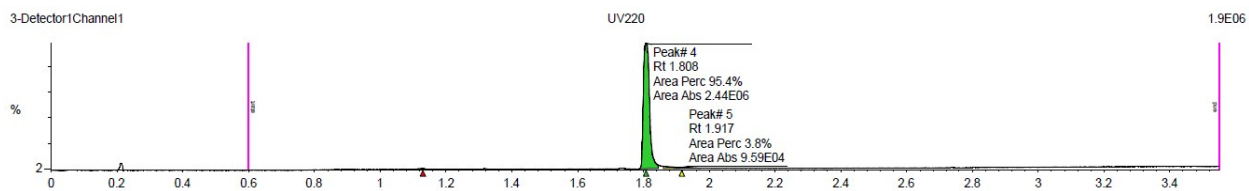

LC-MS (Injection 2: MeCN:H<sub>2</sub>O with 10 mM ammonium acetate) of **81**

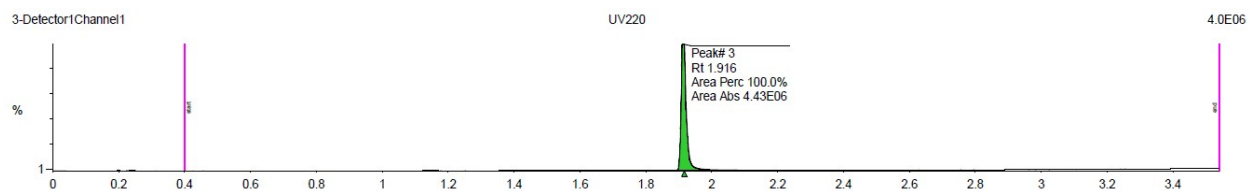

<sup>1</sup>H NMR (DMSO-*d*<sub>6</sub>, 500 MHz) of **82**

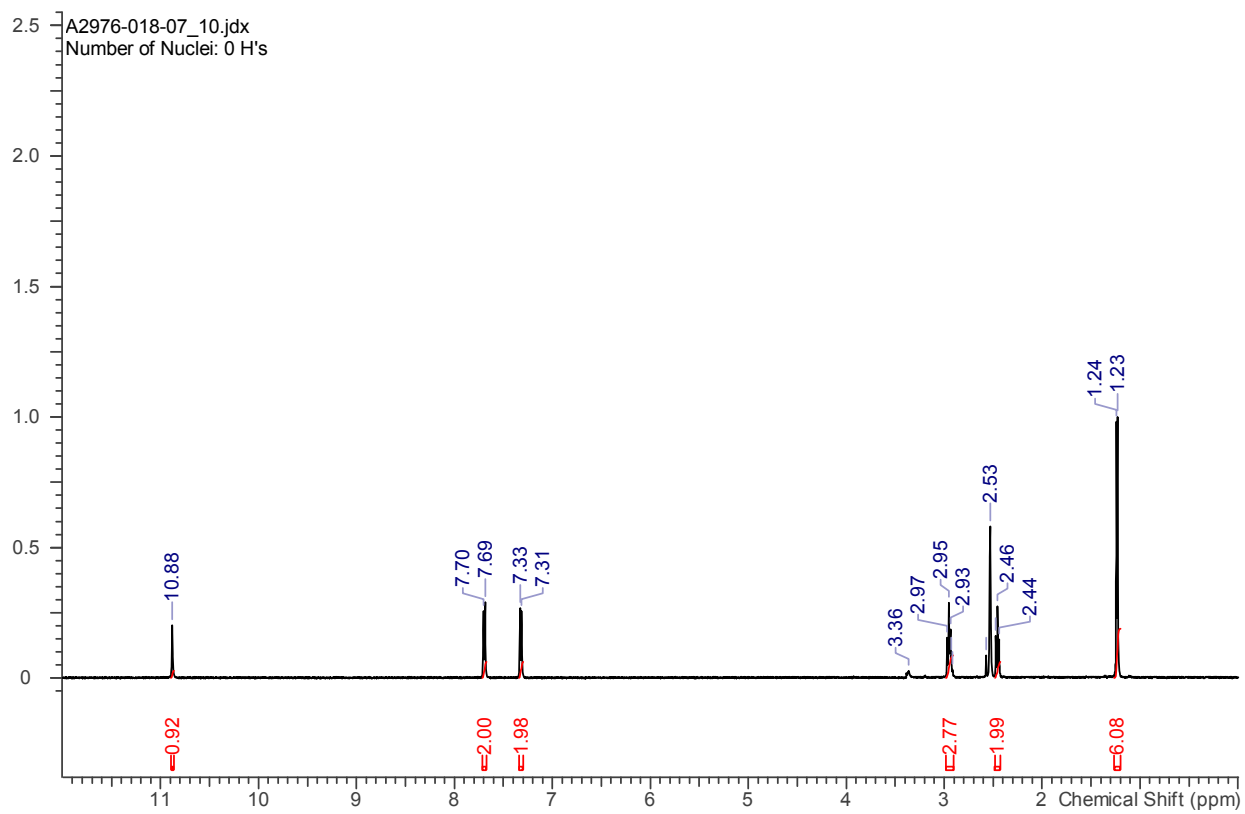

LC-MS (Injection 1: MeCN:H<sub>2</sub>O with 10 mM ammonium acetate) of **82**

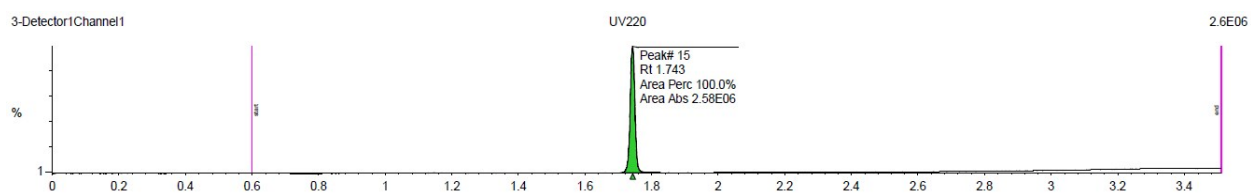

LC-MS (Injection 2: MeCN:H<sub>2</sub>O with 0.1% TFA) of **82**

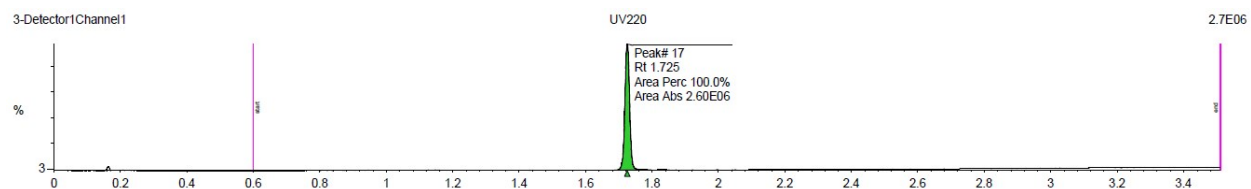

<sup>1</sup>H NMR (DMSO-*d*<sub>6</sub>, 500 MHz) of **83**

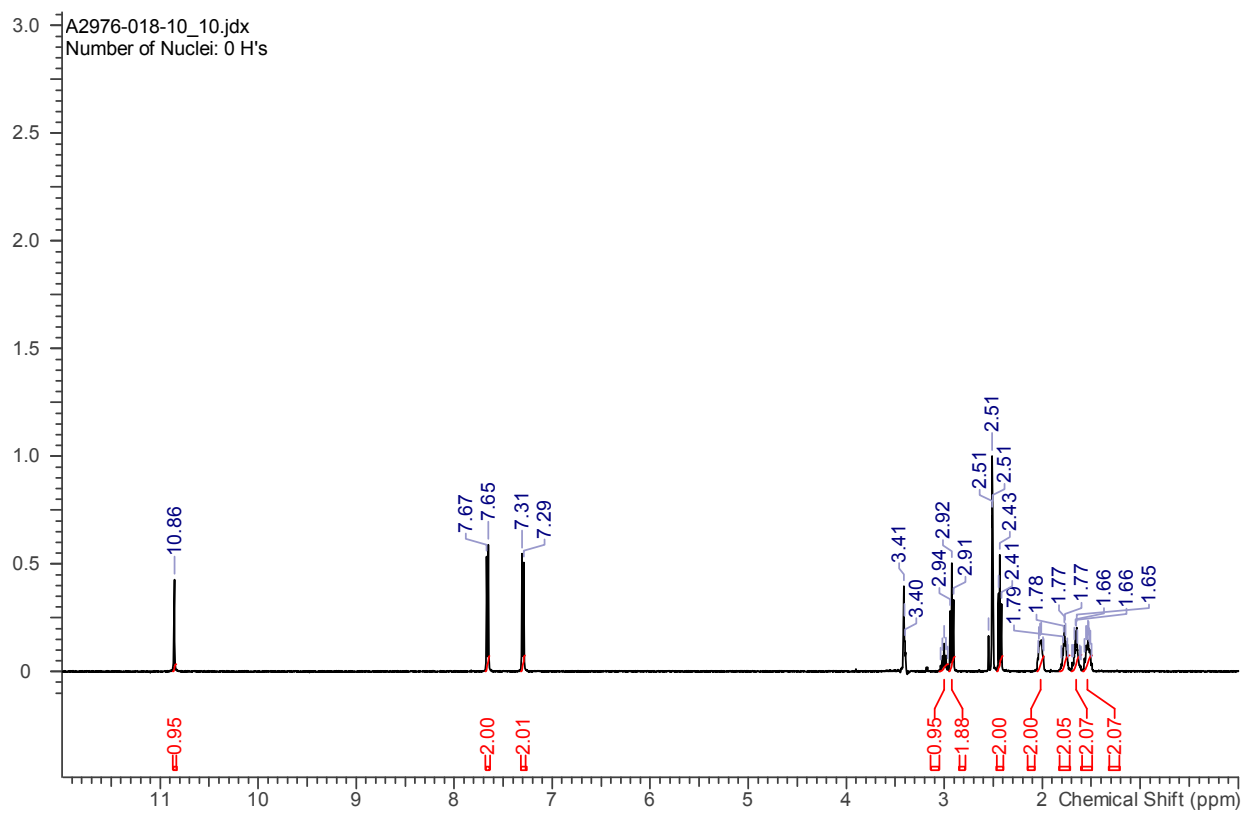

LC-MS (Injection 1: MeCN:H<sub>2</sub>O with 10 mM ammonium acetate) of **83**

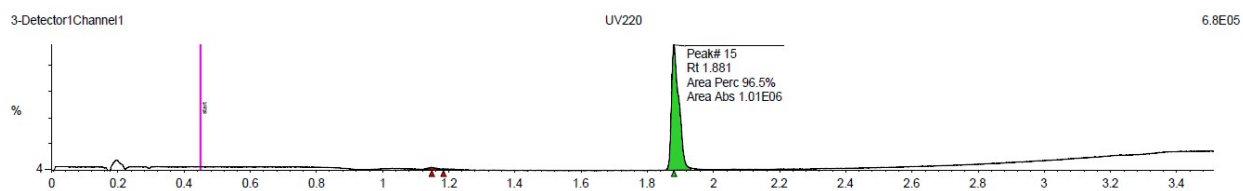

LC-MS (Injection 2: MeCN:H<sub>2</sub>O with 0.1% TFA) of **83**

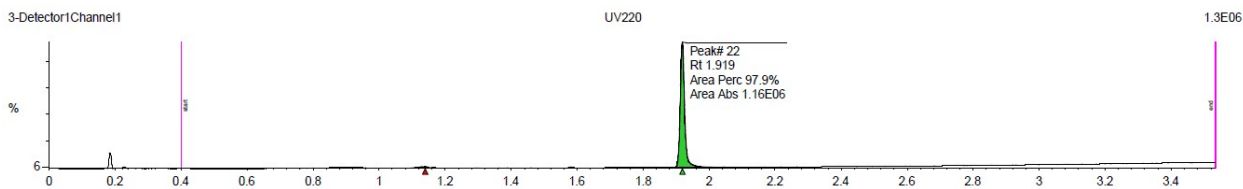

<sup>1</sup>H NMR (DMSO-*d*<sub>6</sub>, 500 MHz) of **84**

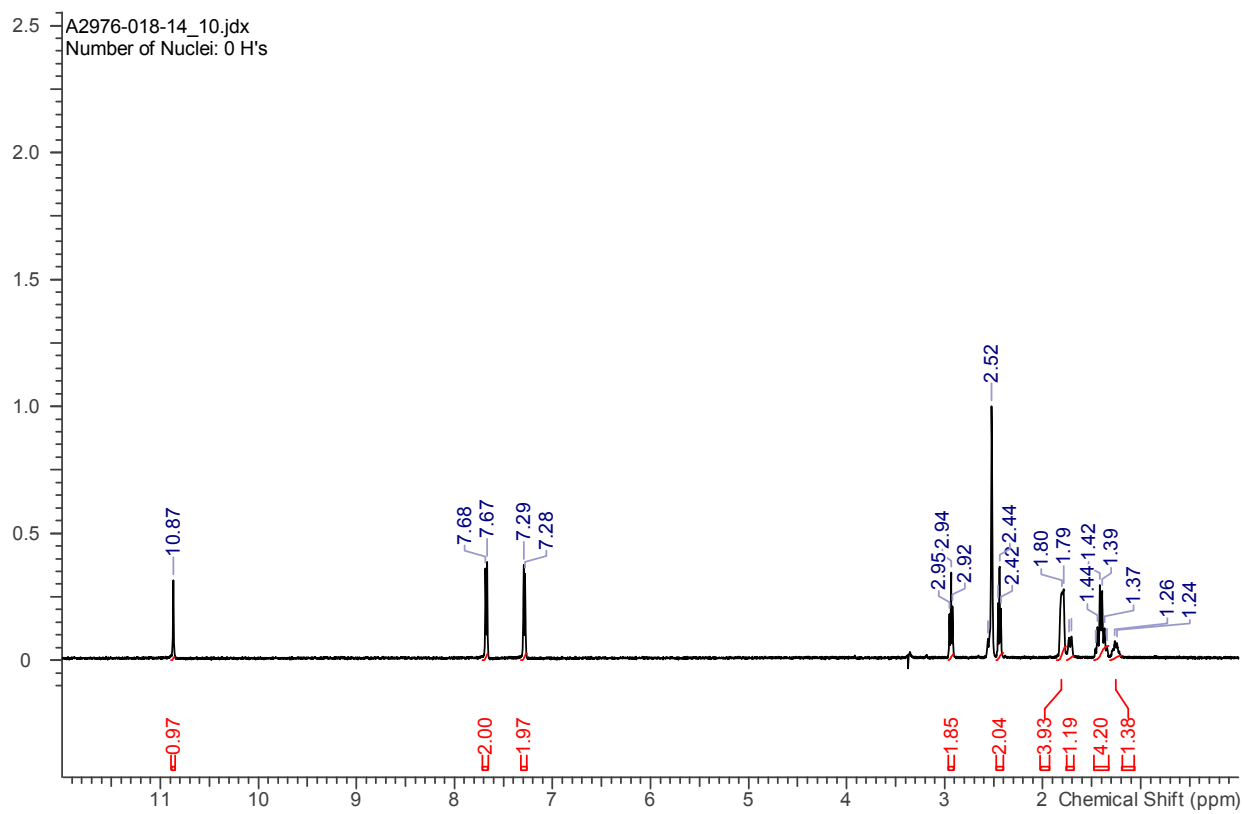

LC-MS (Injection 1: MeCN:H<sub>2</sub>O with 0.1% TFA) of **84**

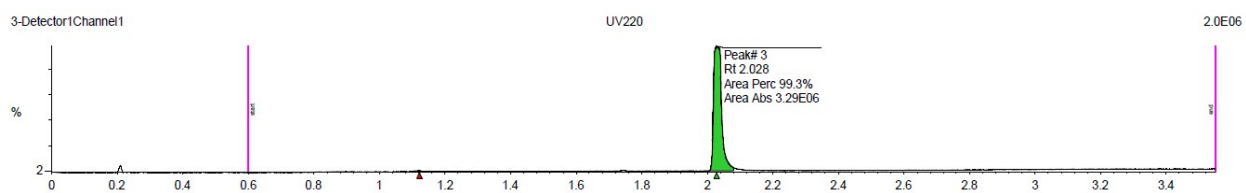

LC-MS (Injection 2: MeCN:H<sub>2</sub>O with 10 mM ammonium acetate) of **84**

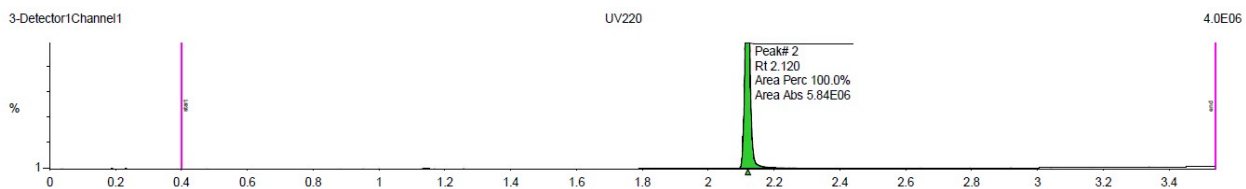

<sup>1</sup>H NMR (DMSO-*d*<sub>6</sub>, 500 MHz) of **85**

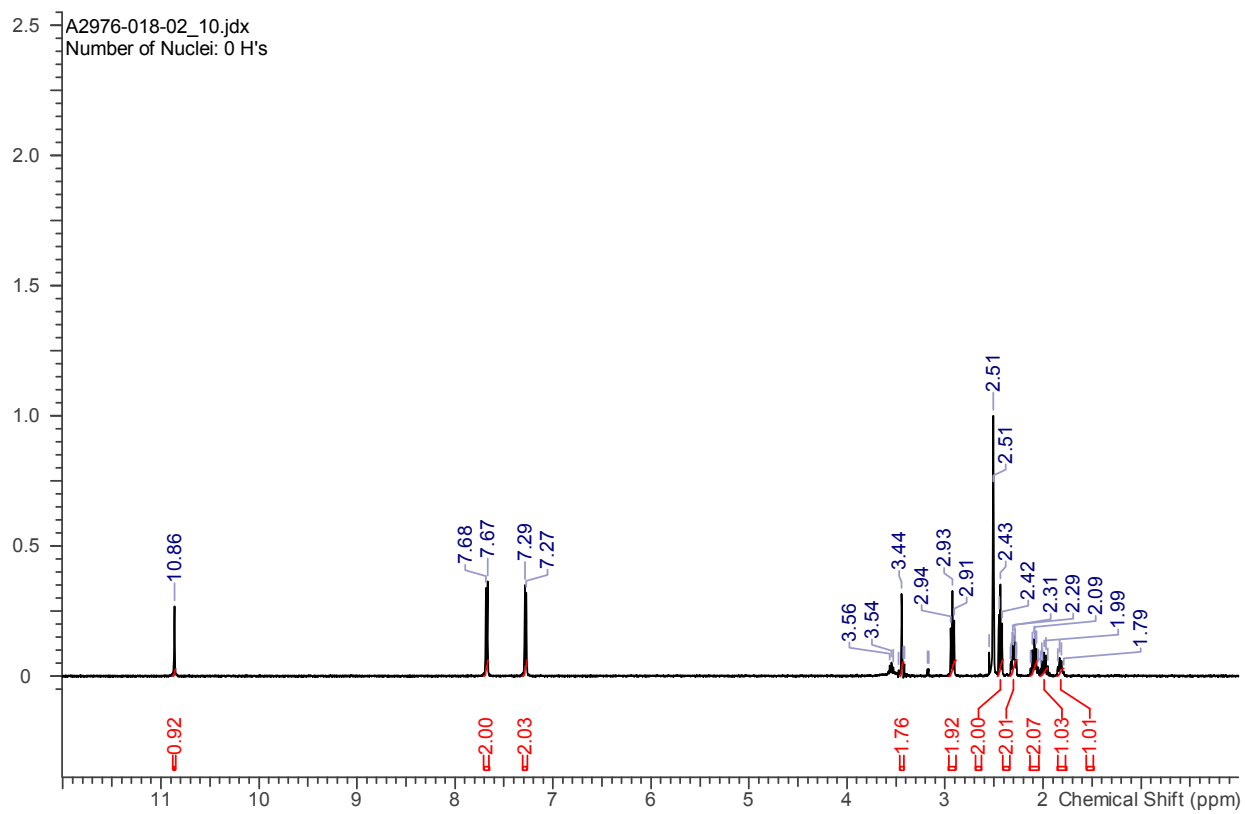

LC-MS (Injection 1: MeCN:H<sub>2</sub>O with 10 mM ammonium acetate) of **85**

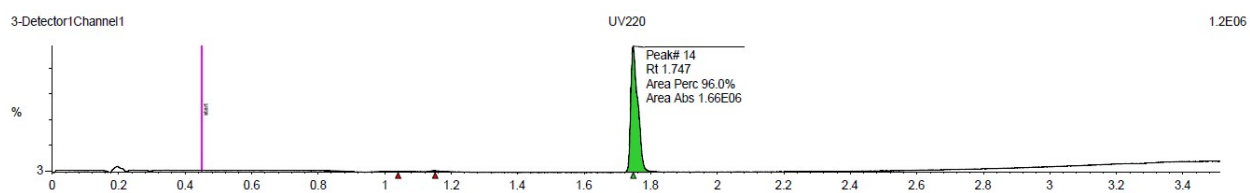

LC-MS (Injection 2: MeCN:H<sub>2</sub>O with 0.1% TFA) of **85**

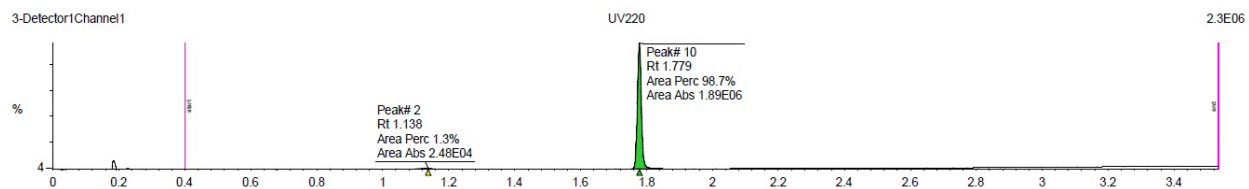



# <sup>1</sup>H NMR (DMSO-*d*<sub>6</sub>, 500 MHz) of **87**

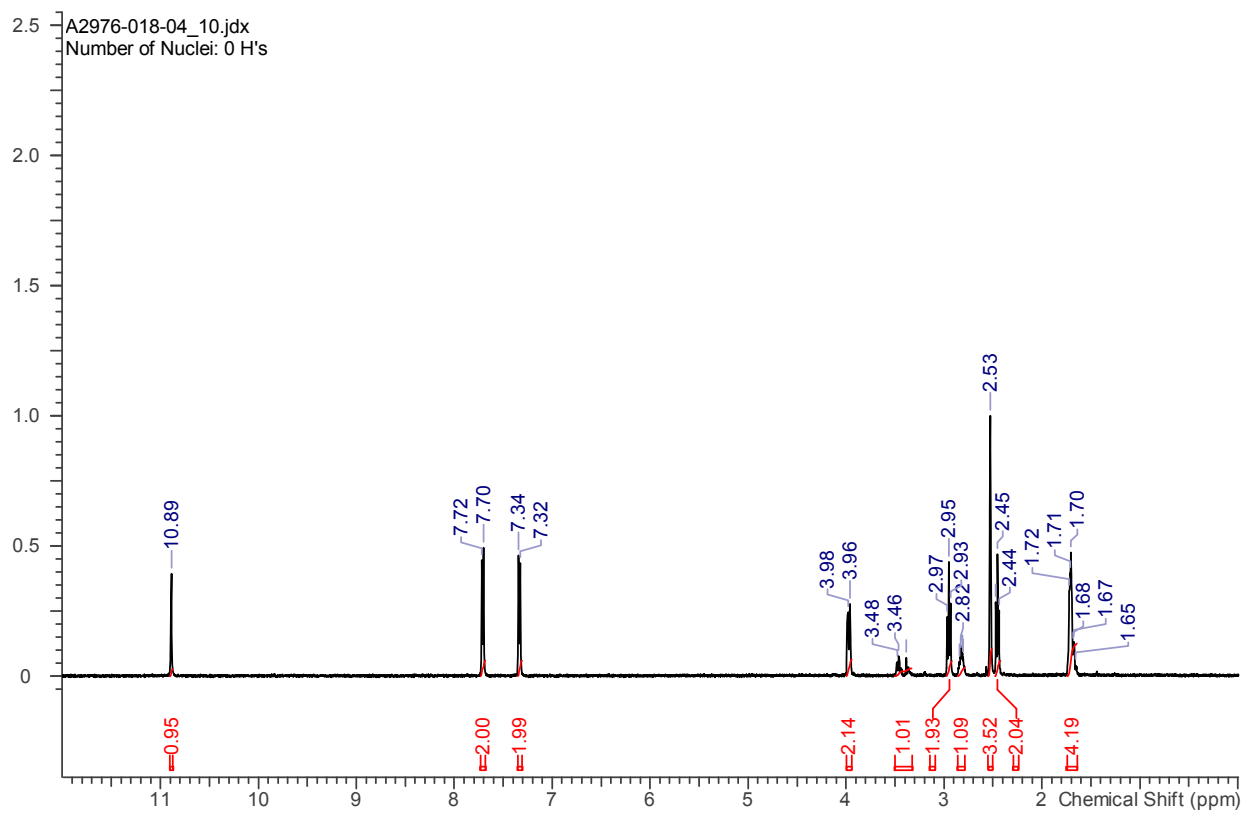

# LC-MS (Injection 1: MeCN:H<sub>2</sub>O with 10 mM ammonium acetate) of **87**

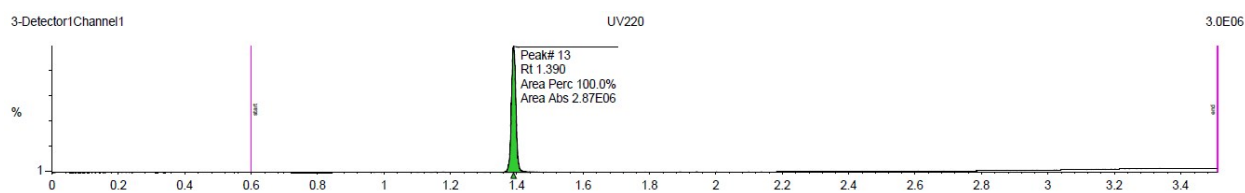

# LC-MS (Injection 2: MeCN:H<sub>2</sub>O with 0.1% TFA) of **87**

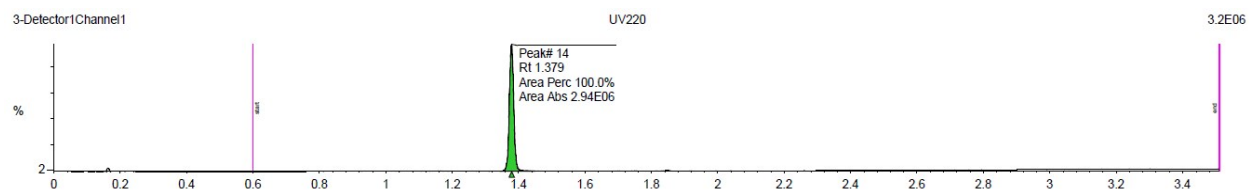

$^1\text{H}$  NMR (DMSO- $d_6$ , 500 MHz) of **88**

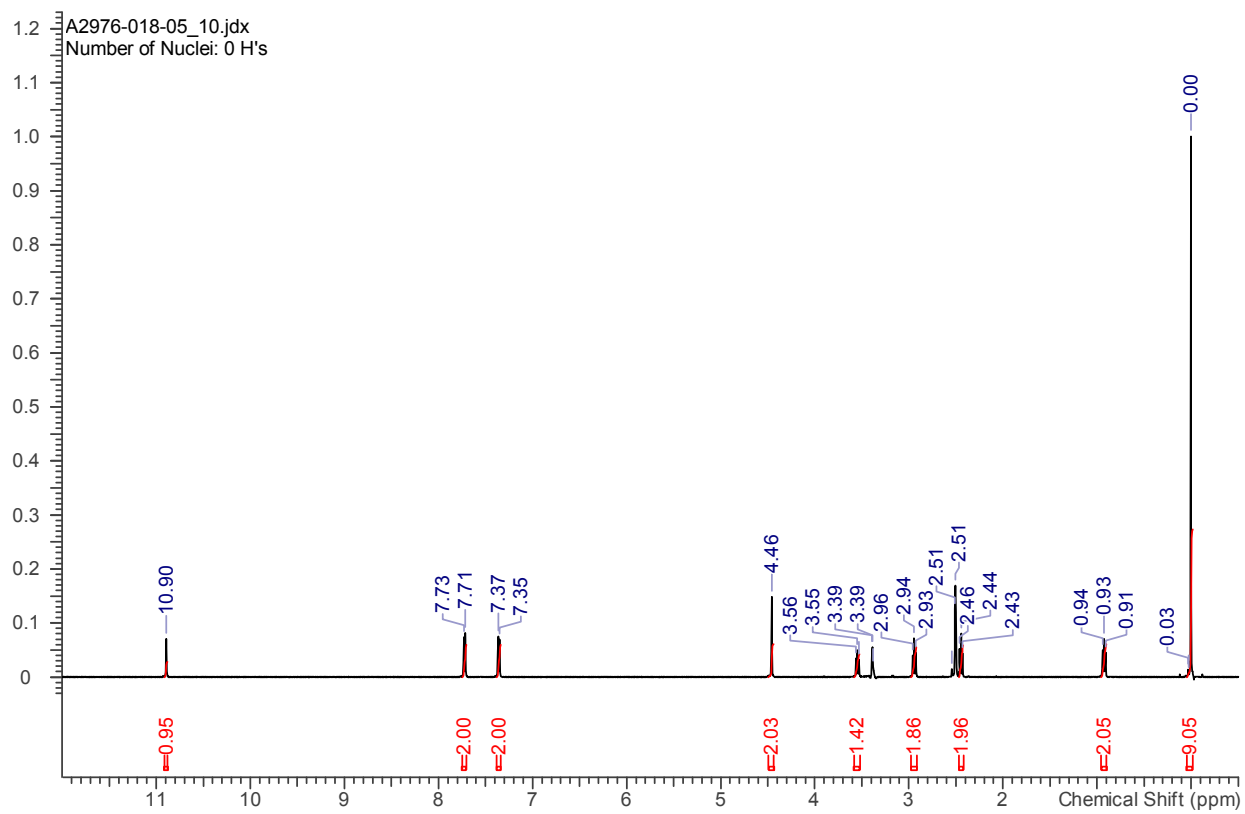

LC-MS (Injection 1: MeCN:H<sub>2</sub>O with 10 mM ammonium acetate) of **88**

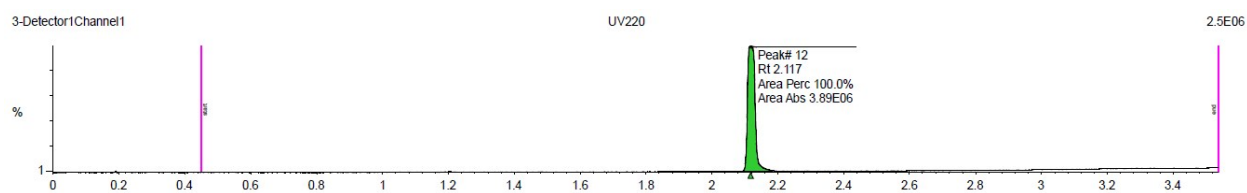

LC-MS (Injection 2: MeCN:H<sub>2</sub>O with 0.1% TFA) of **88**

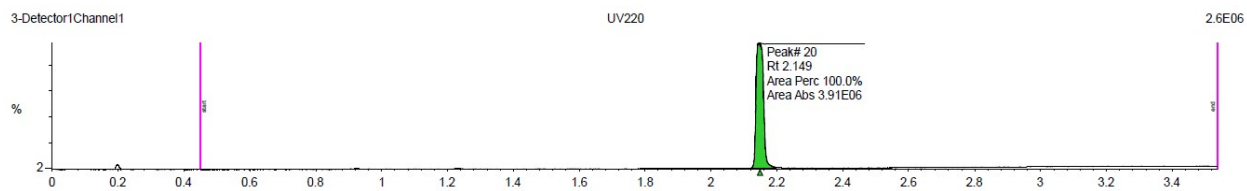

$^1\text{H}$  NMR (DMSO- $d_6$ , 500 MHz) of **89**

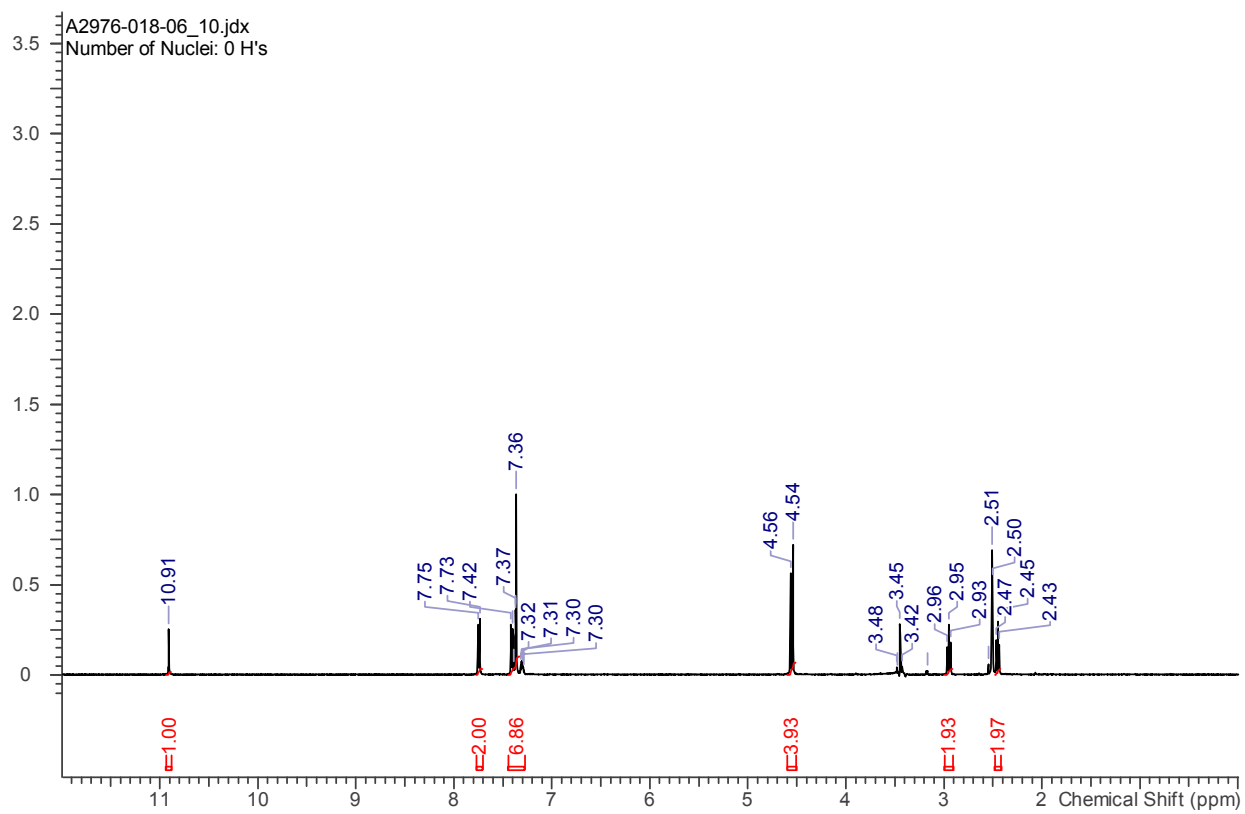

LC-MS (Injection 1: MeCN:H<sub>2</sub>O with 10 mM ammonium acetate) of **89**

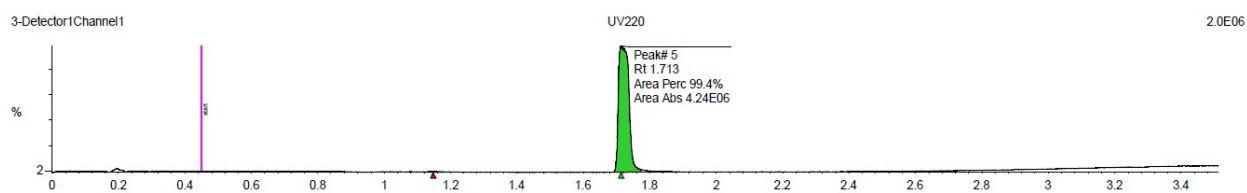

LC-MS (Injection 2: MeCN:H<sub>2</sub>O with 0.1% TFA) of **89**

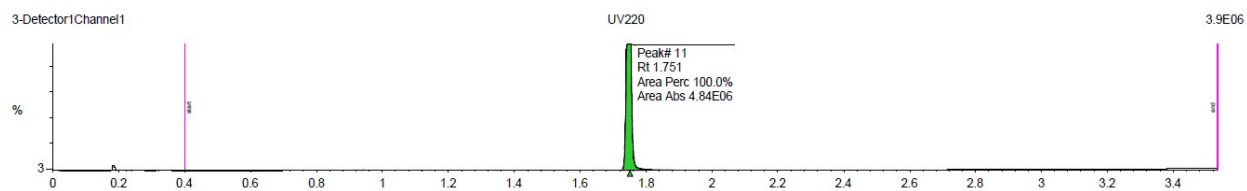

<sup>1</sup>H NMR (DMSO-*d*<sub>6</sub>, 500 MHz) of **90**

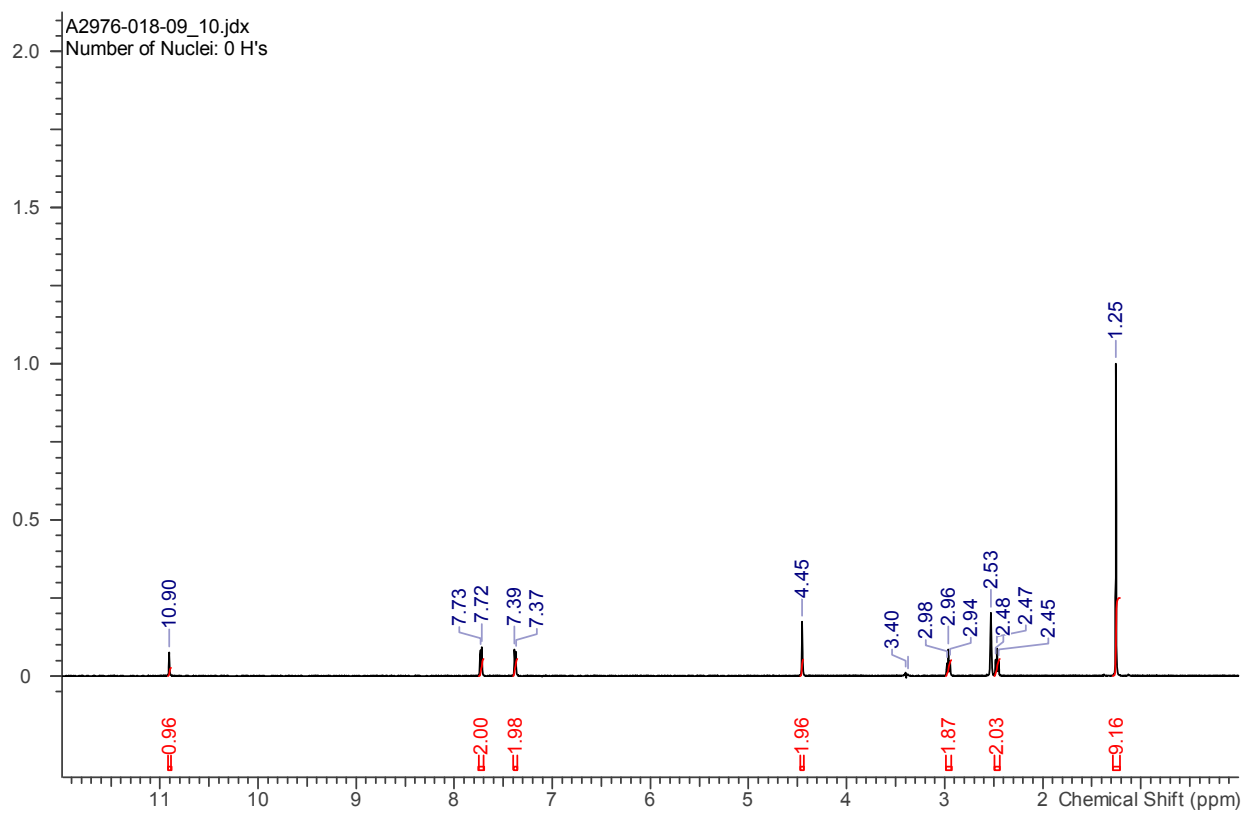

LC-MS (Injection 1: MeCN:H<sub>2</sub>O with 10 mM ammonium acetate) of **90**

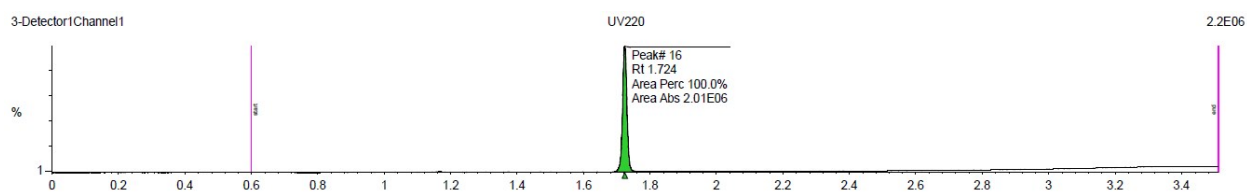

LC-MS (Injection 2: MeCN:H<sub>2</sub>O with 0.1% TFA) of **90**

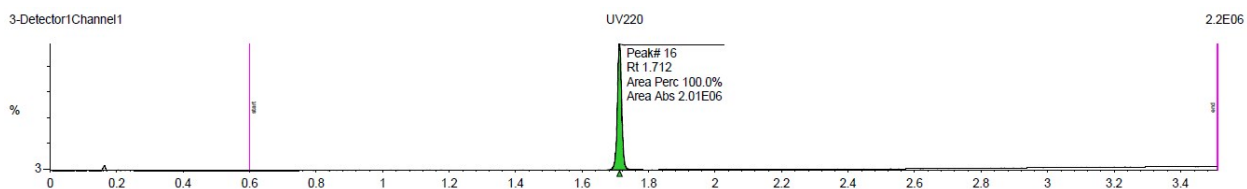

<sup>1</sup>H NMR (DMSO-d<sub>6</sub>, 500 MHz) of **91**

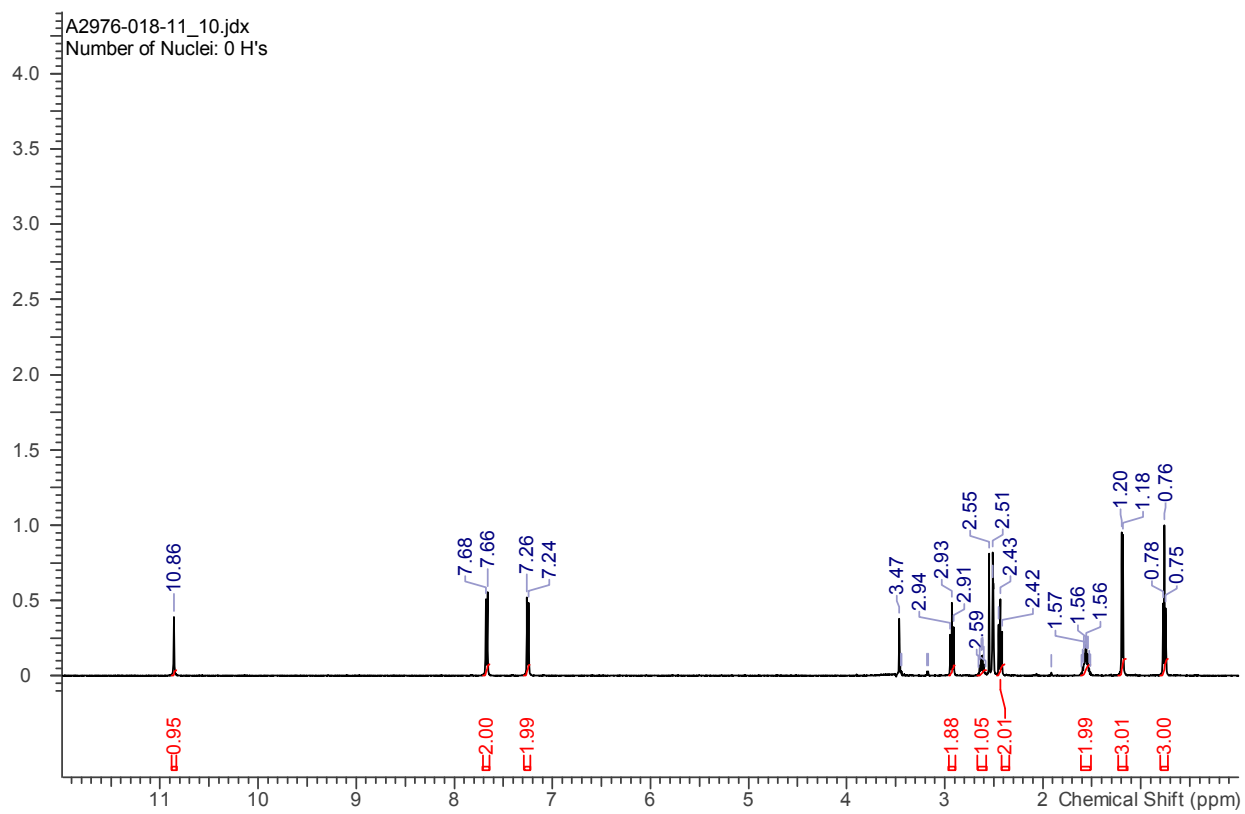

LC-MS (Injection 1: MeCN:H<sub>2</sub>O with 10 mM ammonium acetate) of **91**

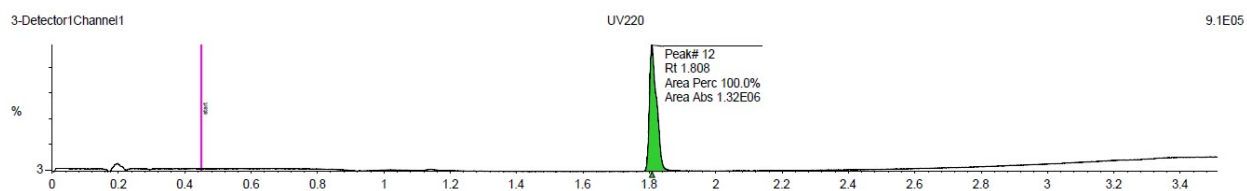

LC-MS (Injection 2: MeCN:H<sub>2</sub>O with 0.1% TFA) of **91**

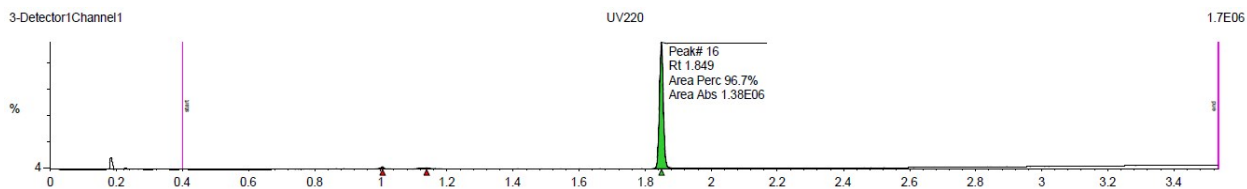

<sup>1</sup>H NMR (DMSO-*d*<sub>6</sub>, 500 MHz) of **92**

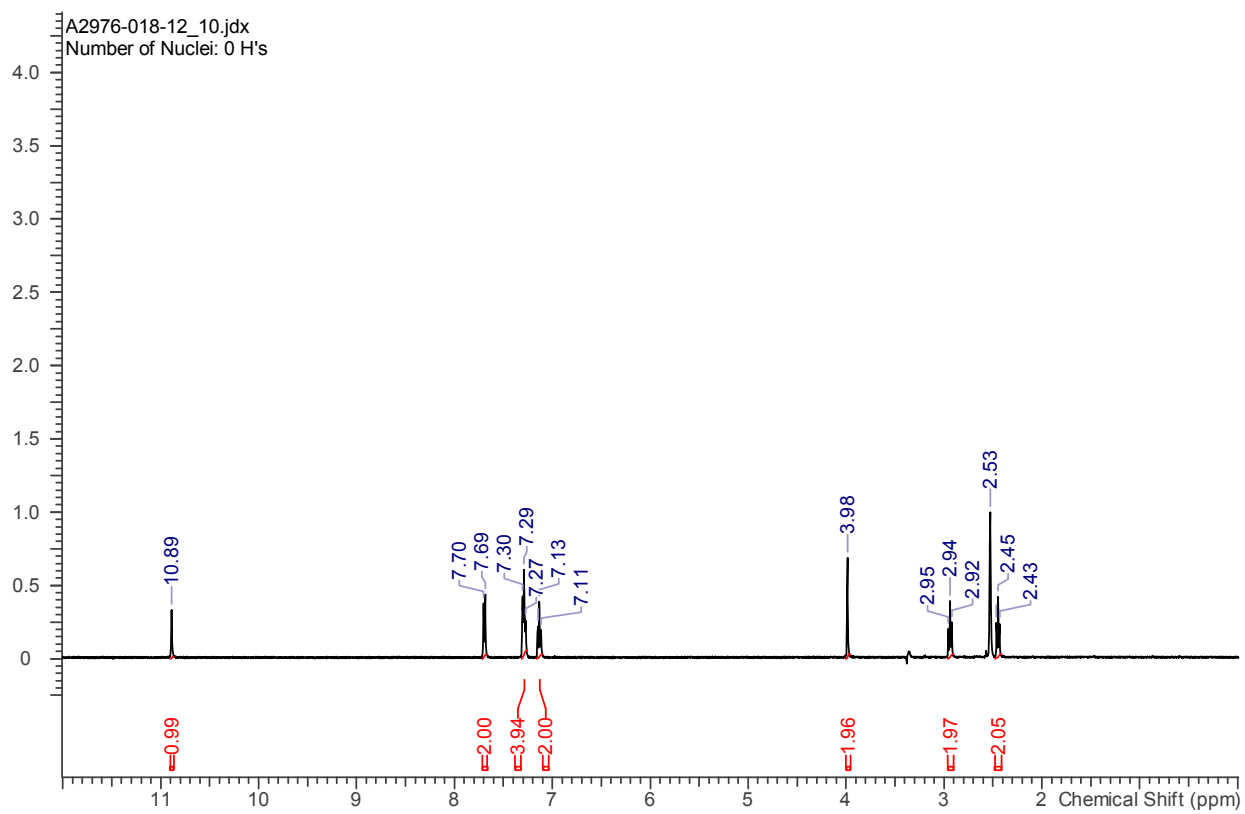

LC-MS (Injection 1: MeCN:H<sub>2</sub>O with 10 mM ammonium acetate) of **92**

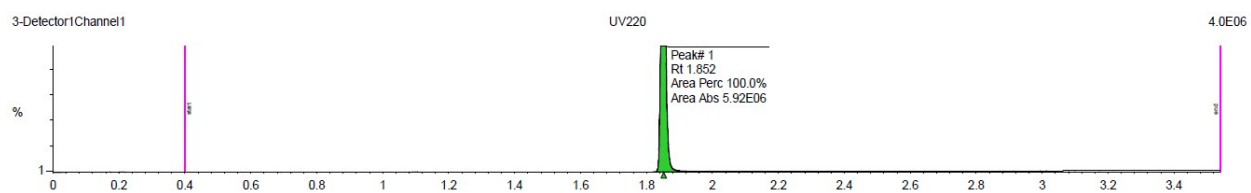

LC-MS (Injection 2: MeCN:H<sub>2</sub>O with 0.1% TFA) of **92**

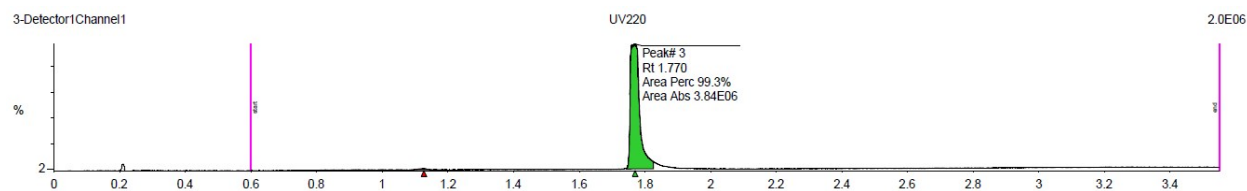

<sup>1</sup>H NMR (DMSO-*d*<sub>6</sub>, 500 MHz) of **93**

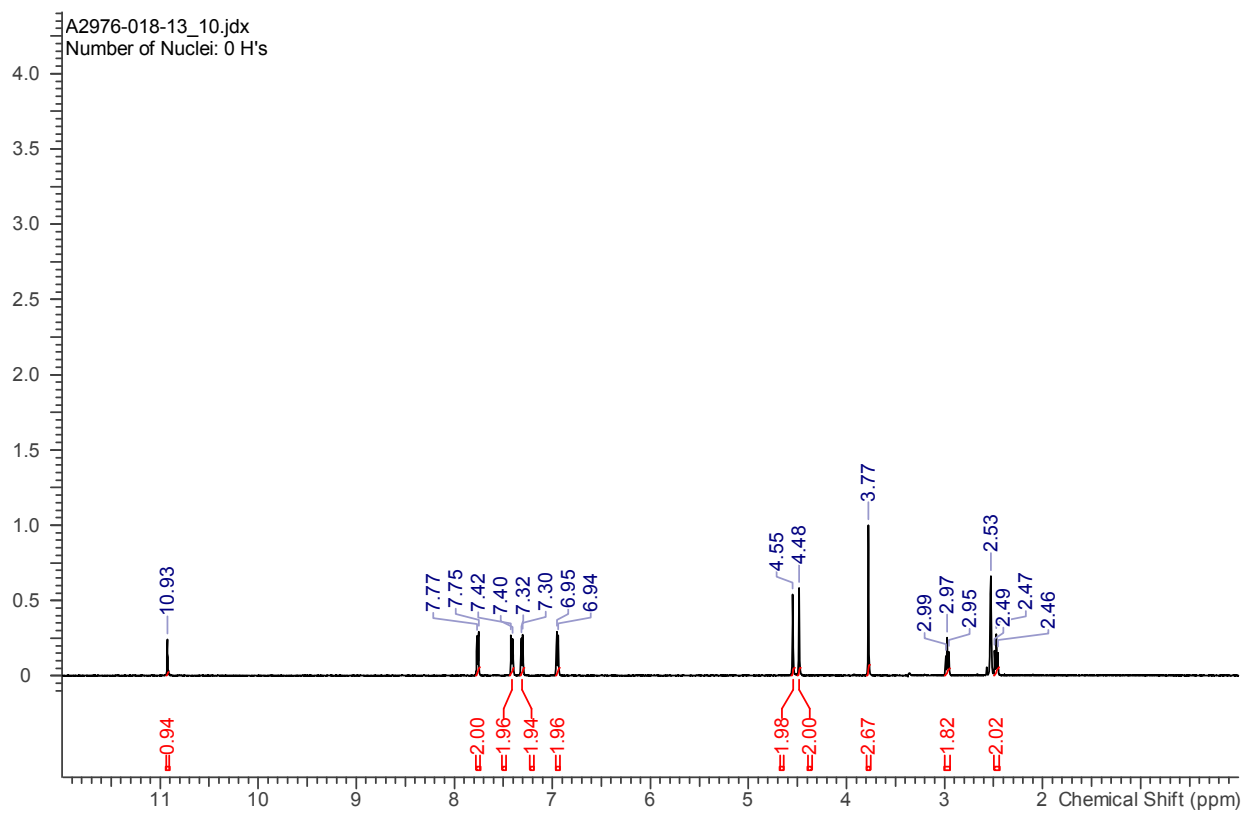

LC-MS (Injection 1: MeCN:H<sub>2</sub>O with 10 mM ammonium acetate) of **93**

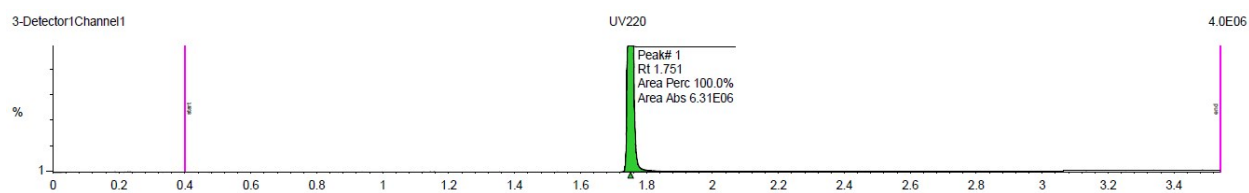

LC-MS (Injection 2: MeCN:H<sub>2</sub>O with 0.1% TFA) of **93**

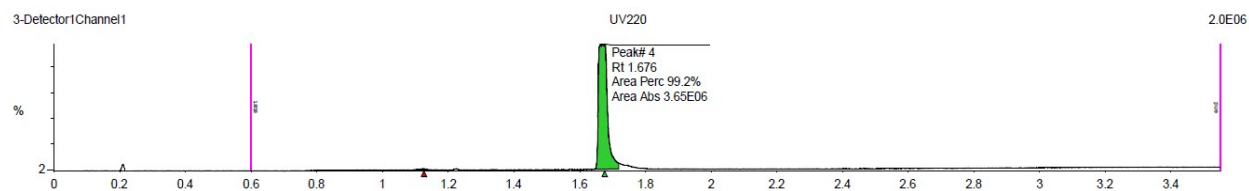

$^1\text{H}$  NMR (DMSO- $d_6$ , 500 MHz) of **95**

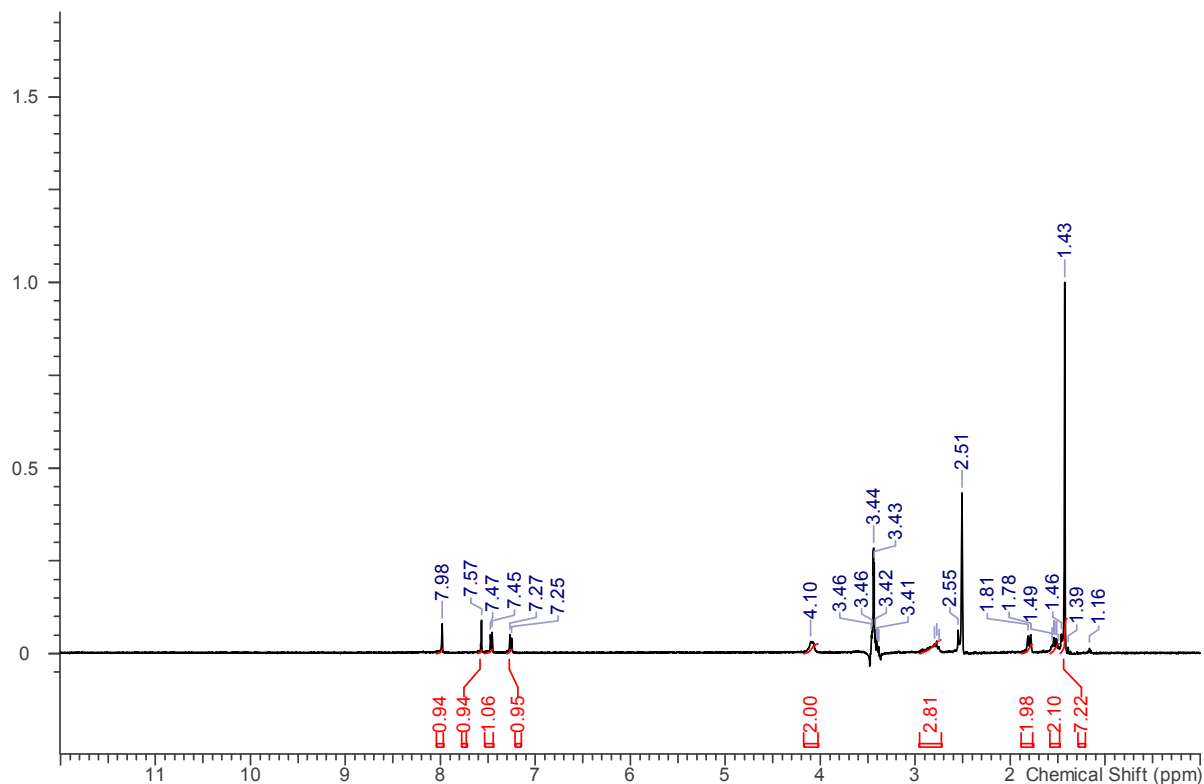

LC-MS (Injection 1: MeCN:H<sub>2</sub>O with 0.1% TFA) of **95**

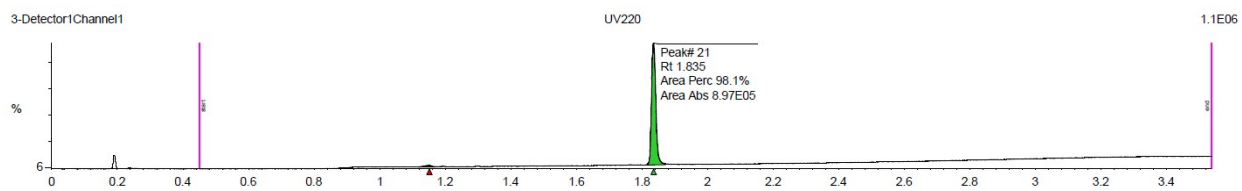

LC-MS (Injection 2: MeCN:H<sub>2</sub>O with 10 mM ammonium acetate) of **95**

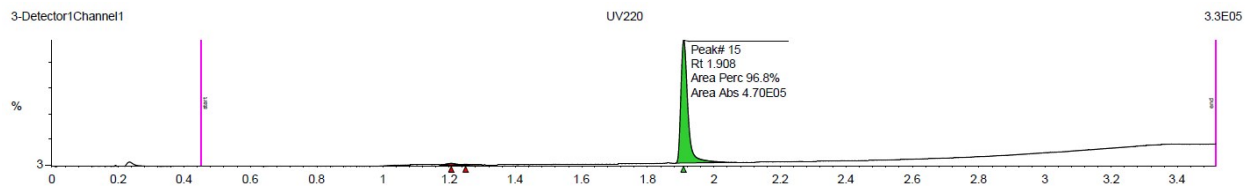



$^1\text{H}$  NMR (DMSO- $d_6$ , 500 MHz) of **98**

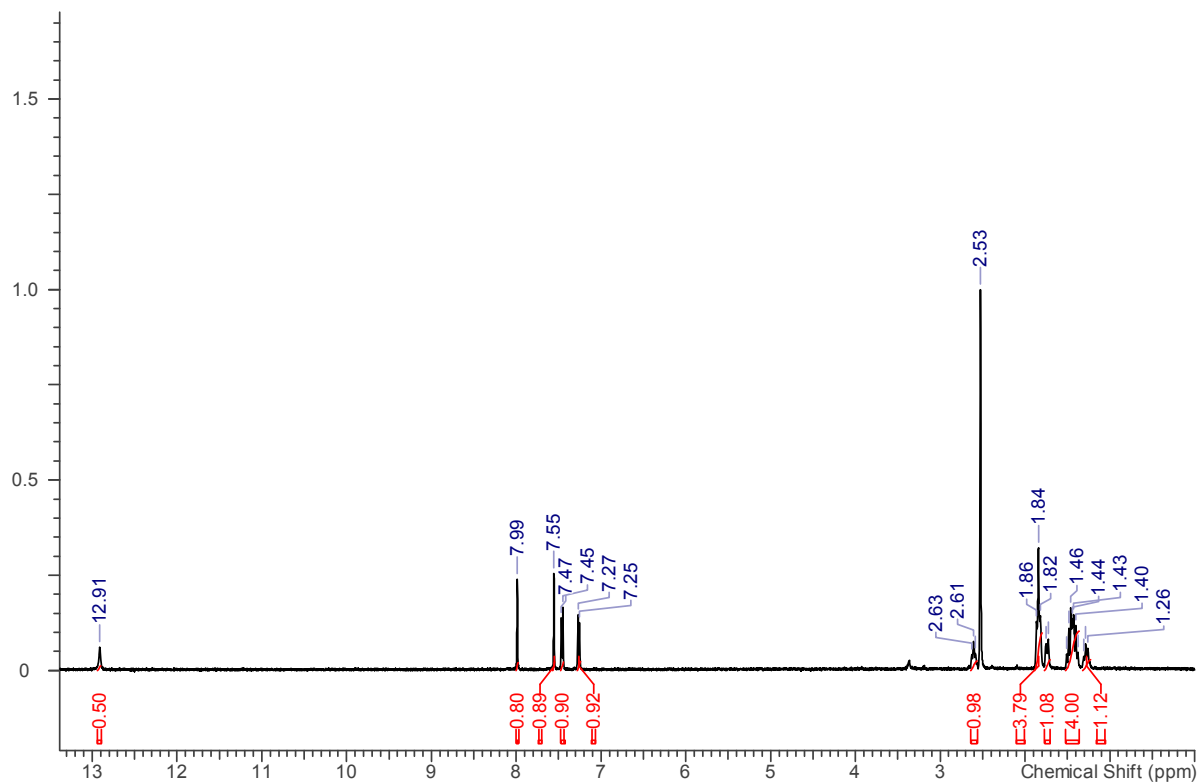

LC-MS (Injection 1: MeCN:H<sub>2</sub>O with 10 mM ammonium acetate) of **98**

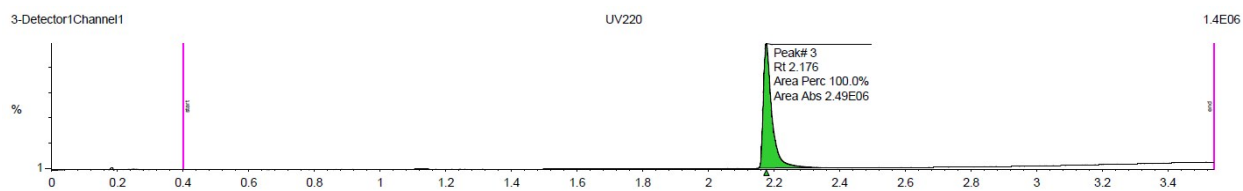

LC-MS (Injection 2: MeCN:H<sub>2</sub>O with 0.1% TFA) of **98**

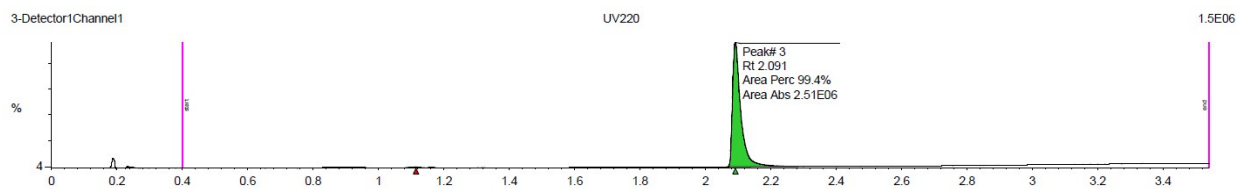

$^1\text{H}$  NMR (DMSO- $d_6$ , 500 MHz) of **101**

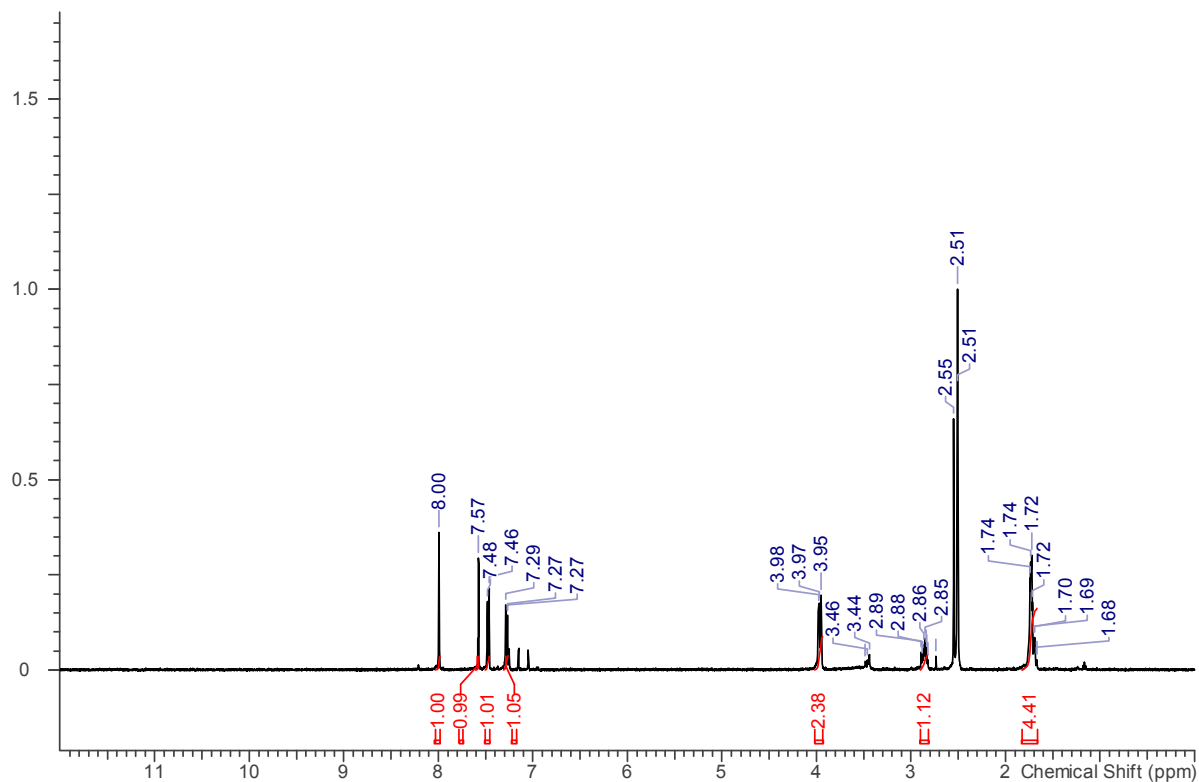

LC-MS (Injection 1: MeCN:H<sub>2</sub>O with 10 mM ammonium acetate) of **101**

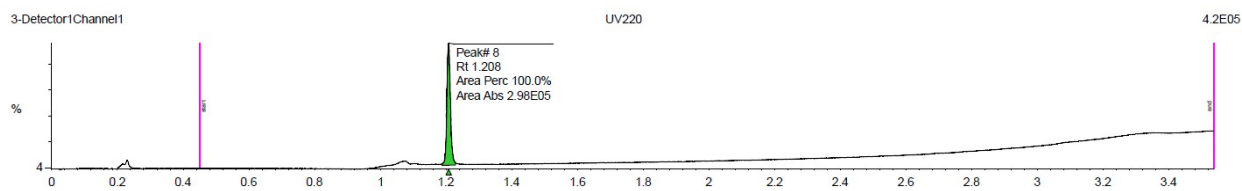

LC-MS (Injection 2: MeCN:H<sub>2</sub>O with 0.1% TFA) of **101**

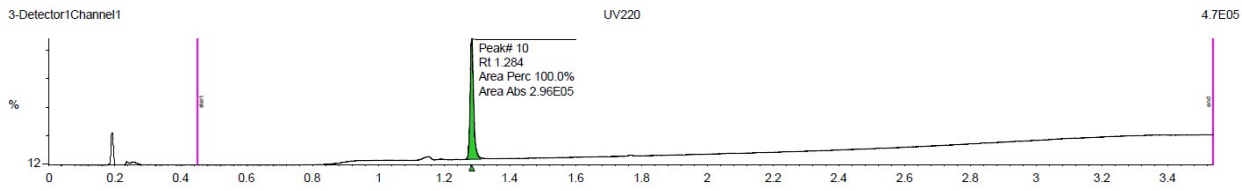

$^1\text{H}$  NMR (DMSO- $d_6$ , 500 MHz) of **102**

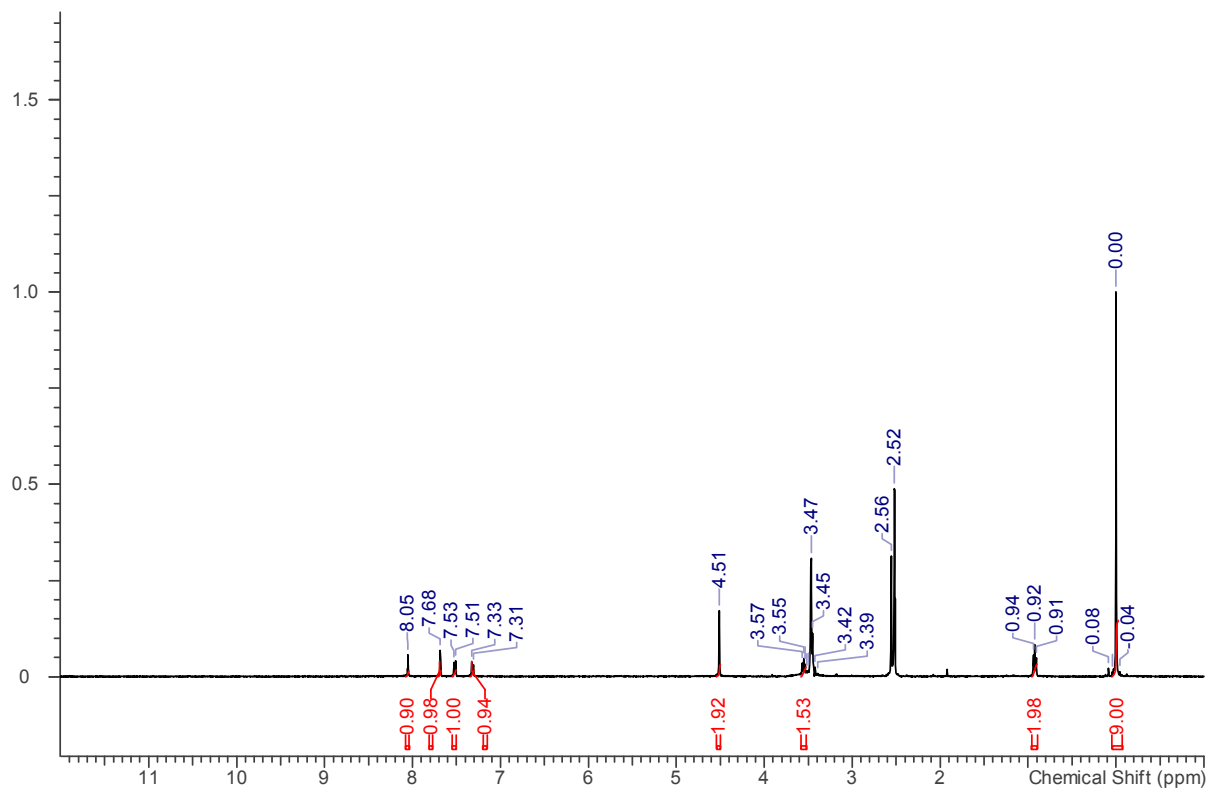

LC-MS (Injection 1: MeCN:H<sub>2</sub>O with 10 mM ammonium acetate) of **102**

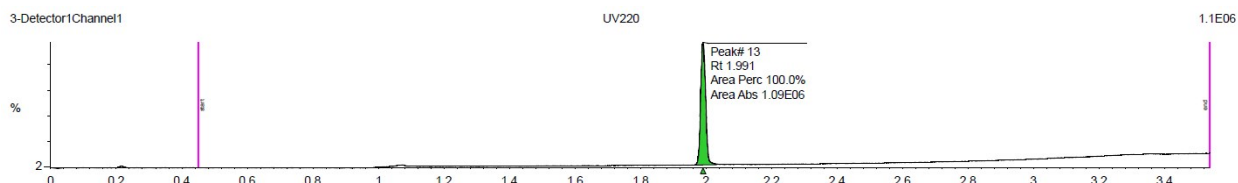

LC-MS (Injection 2: MeCN:H<sub>2</sub>O with 0.1% TFA) of **102**

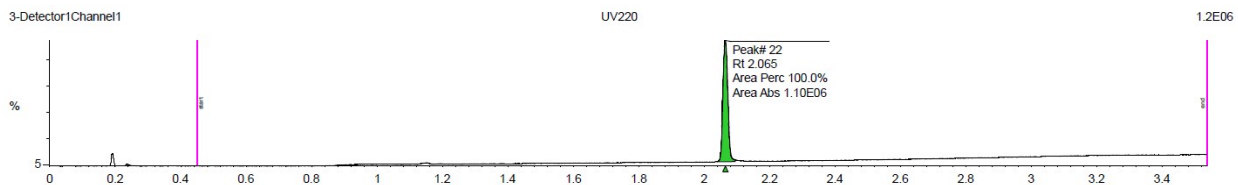

$^1\text{H}$  NMR (DMSO- $d_6$ , 500 MHz) of **104**

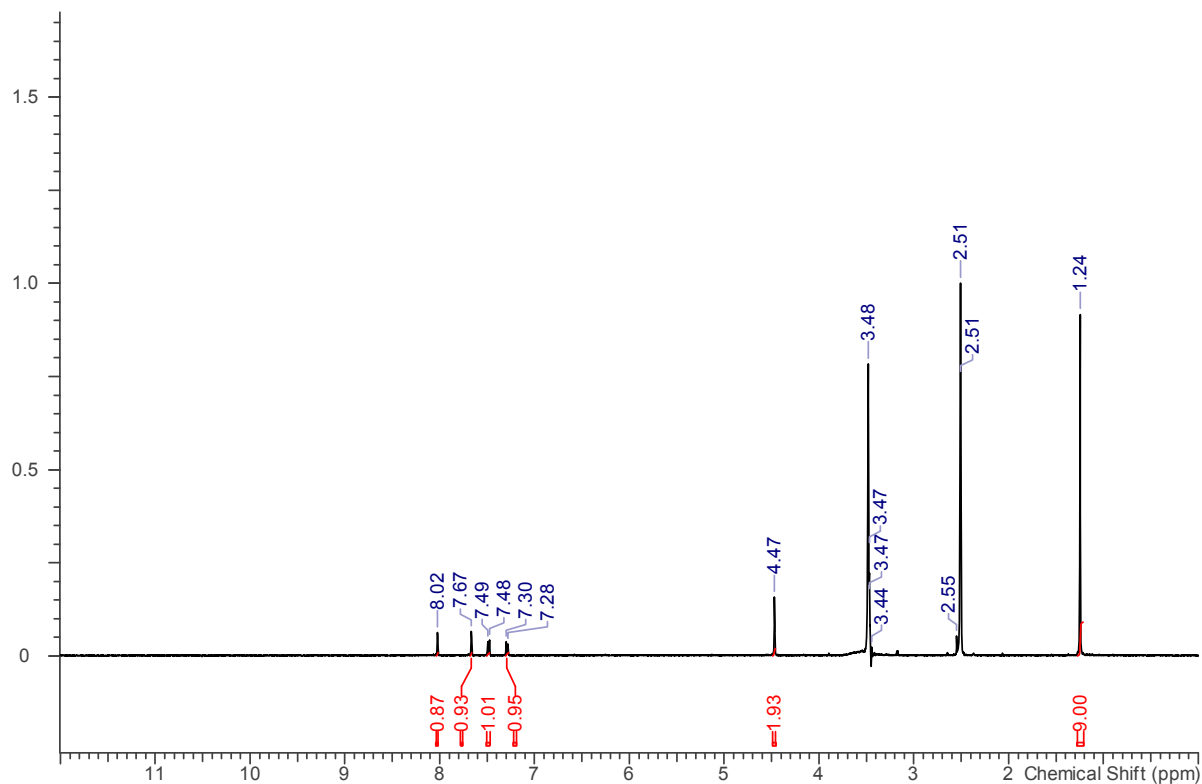

LC-MS (Injection 1: MeCN:H $_2$ O with 0.1% TFA) of **104**

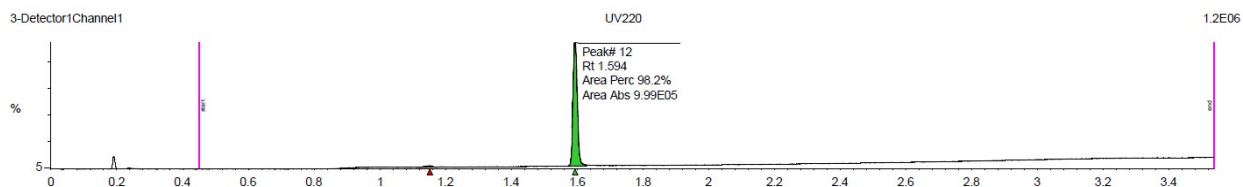

LC-MS (Injection 2: MeCN:H $_2$ O with 10 mM ammonium acetate) of **104**

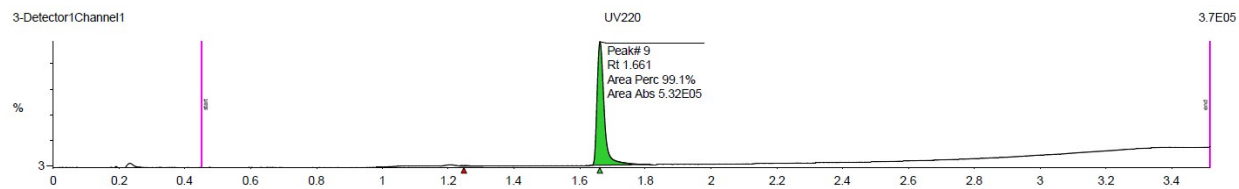

<sup>1</sup>H NMR (DMSO-*d*<sub>6</sub>, 500 MHz) of **106**

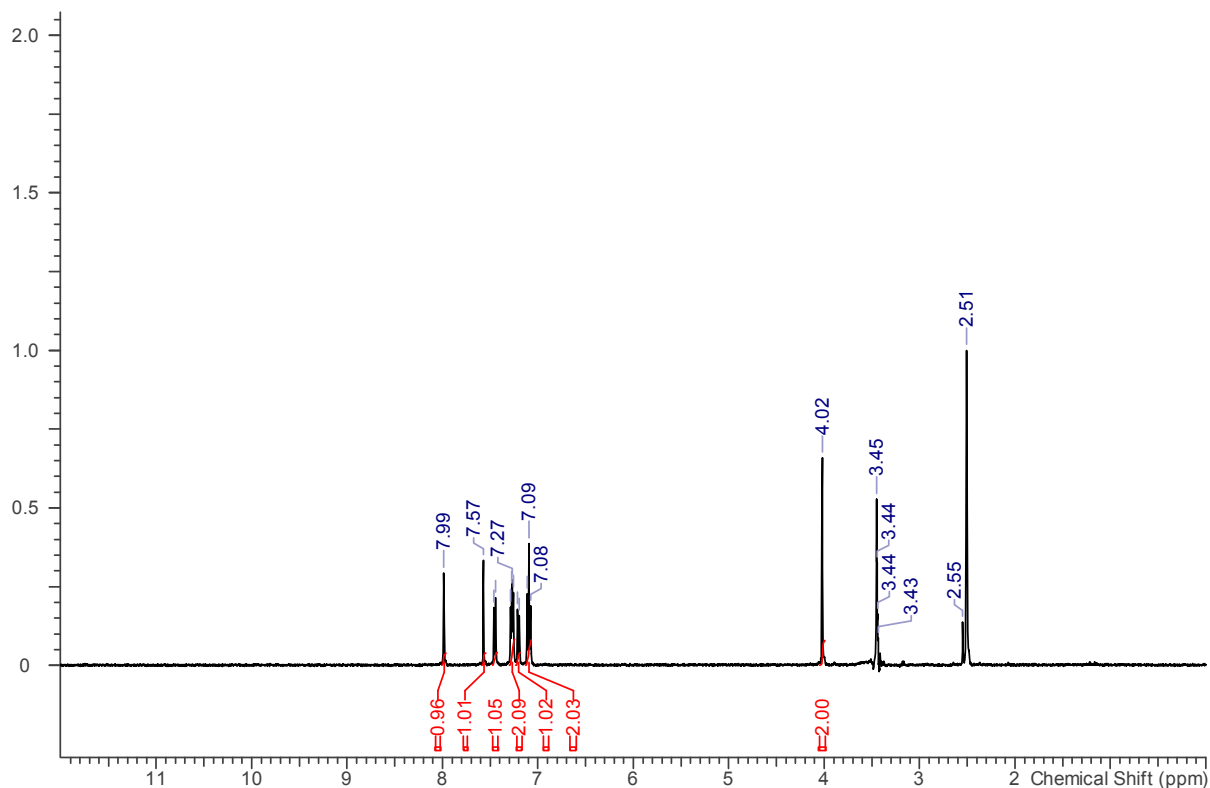

LC-MS (Injection 1: MeCN:H<sub>2</sub>O with 10 mM ammonium acetate) of **106**

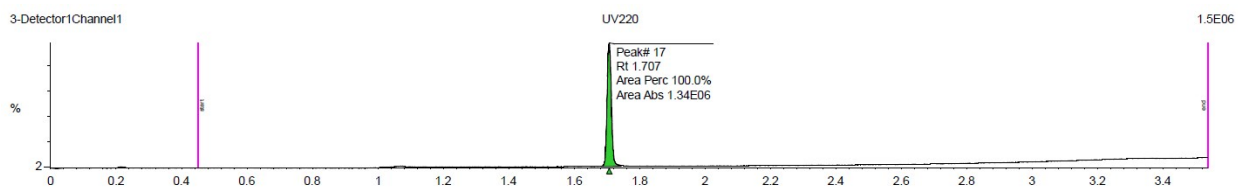

LC-MS (Injection 2: MeCN:H<sub>2</sub>O with 0.1% TFA) of **106**

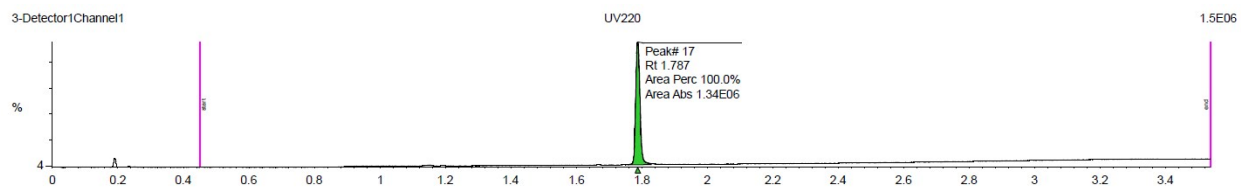

$^1\text{H}$  NMR (DMSO- $d_6$ , 500 MHz) of **107**

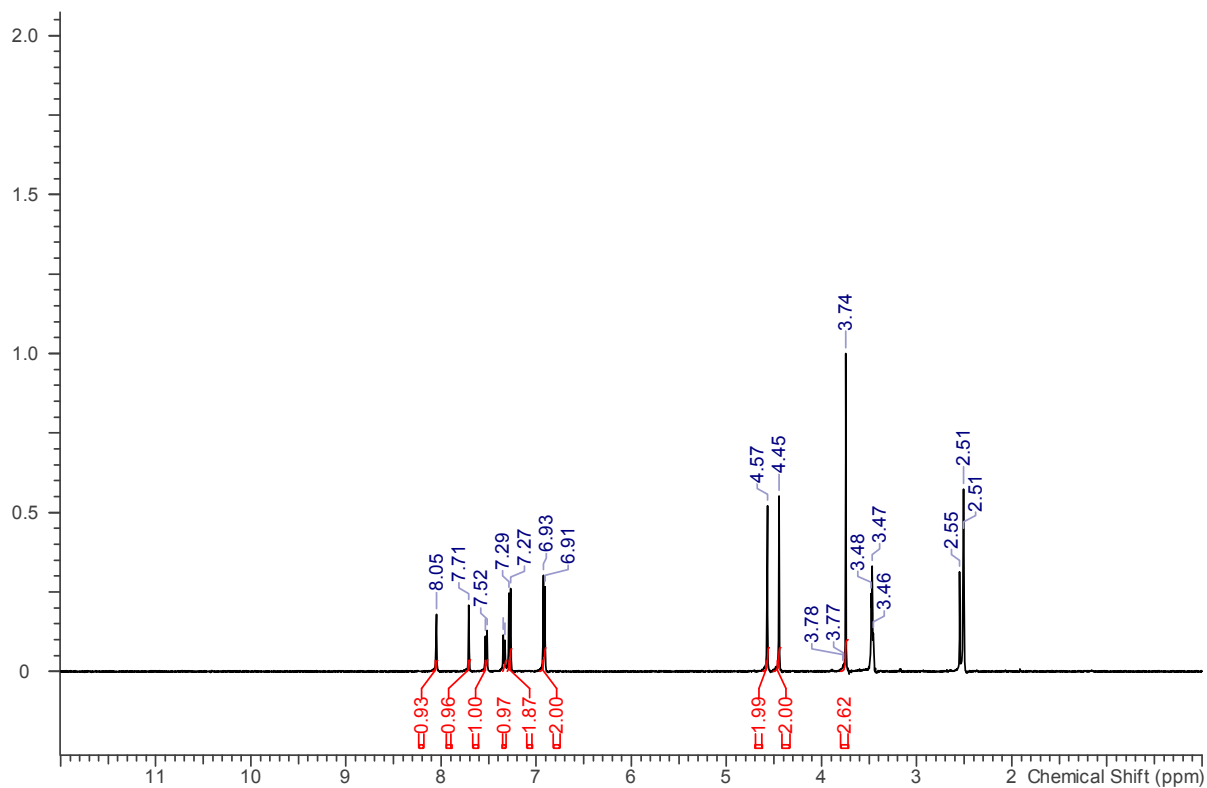

LC-MS (Injection 1: MeCN:H $_2$ O with 10 mM ammonium acetate) of **107**

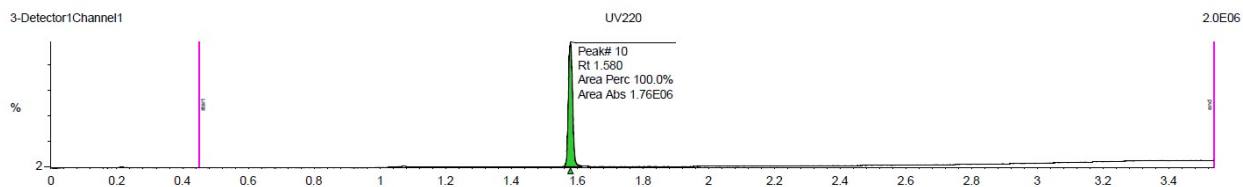

LC-MS (Injection 2: MeCN:H $_2$ O with 0.1% TFA) of **107**

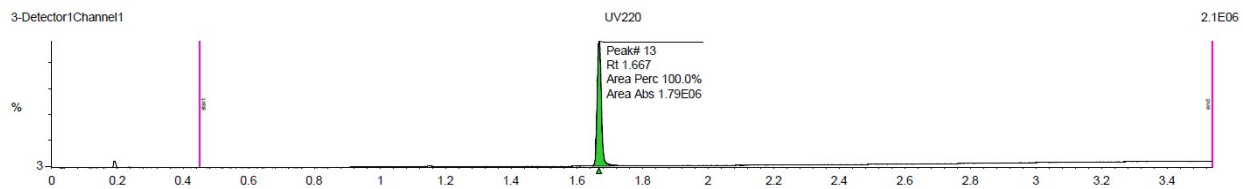

<sup>1</sup>H NMR (DMSO-*d*<sub>6</sub>, 500 MHz) of **122**

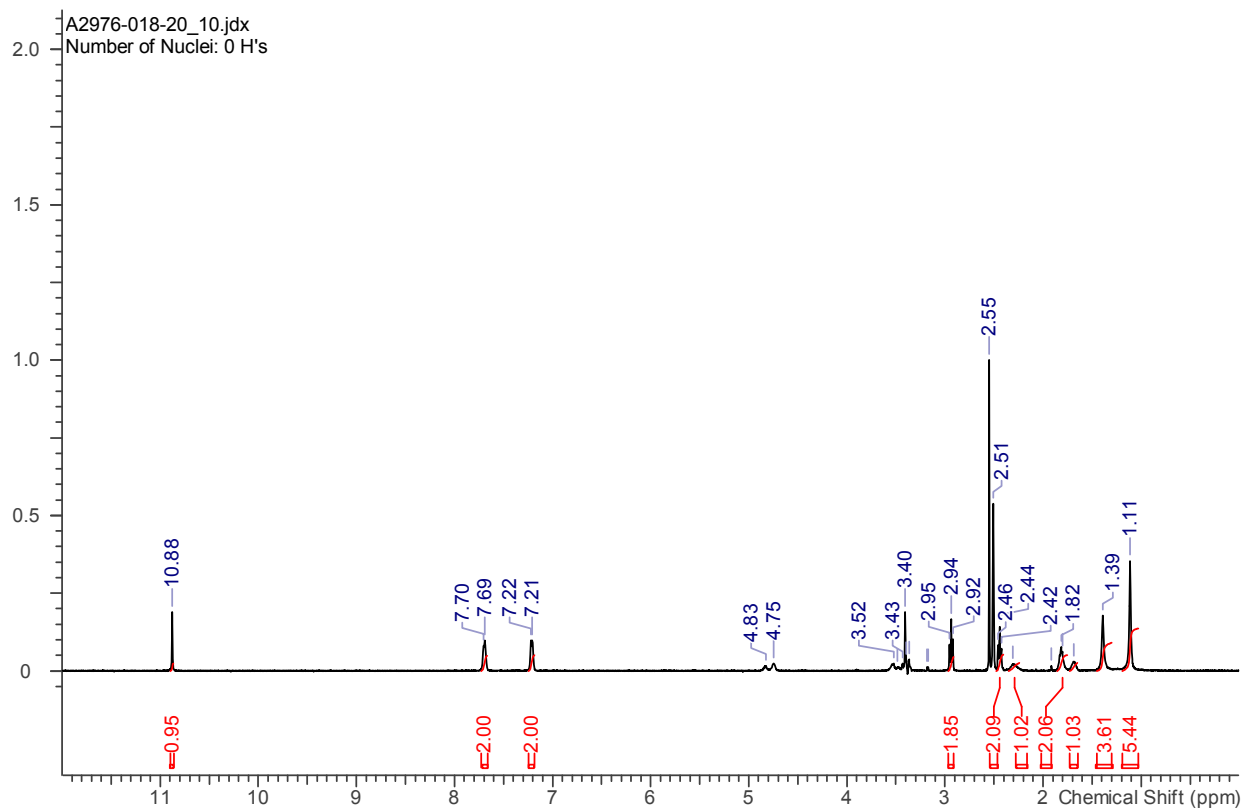

LC-MS (Injection 1: MeCN:H<sub>2</sub>O with 10 mM ammonium acetate) of **122**

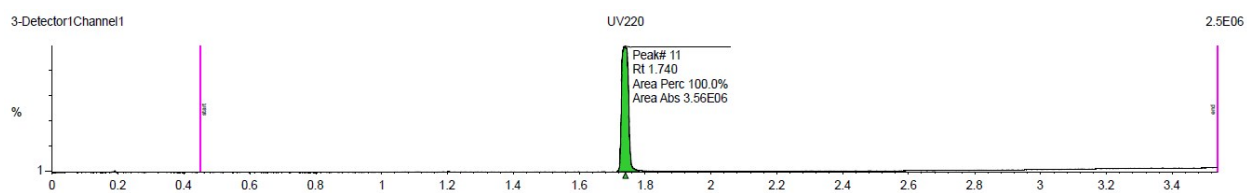

LC-MS (Injection 2: MeCN:H<sub>2</sub>O with 0.1% TFA) of **122**

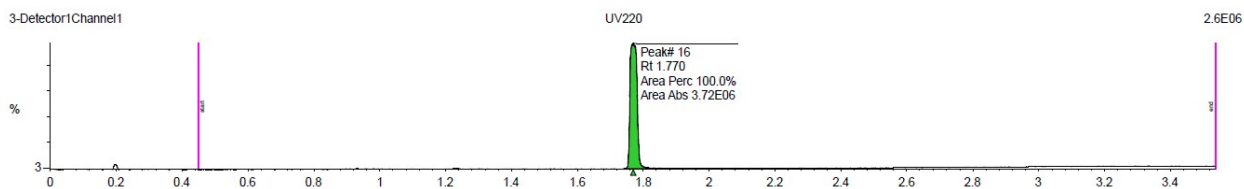

<sup>1</sup>H NMR (DMSO-*d*<sub>6</sub>, 500 MHz) of **123**

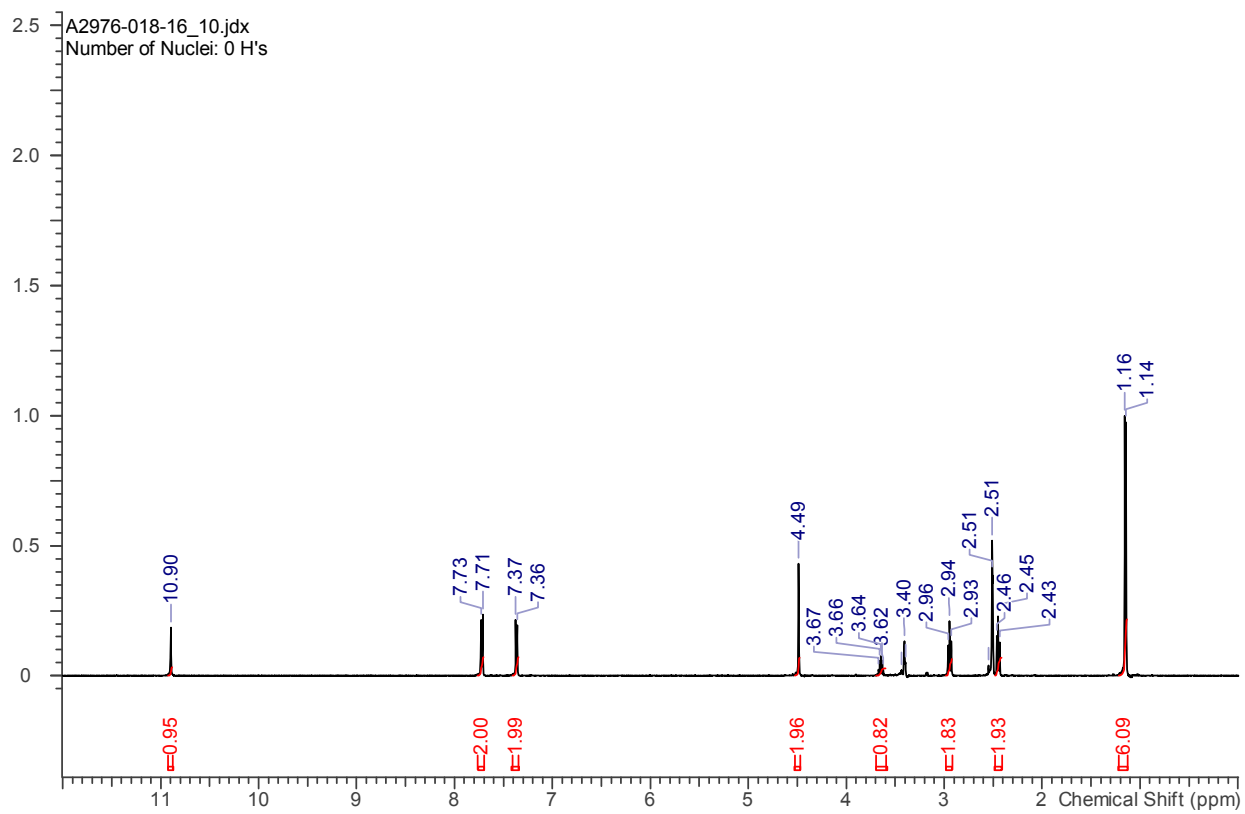

LC-MS (Injection 1: MeCN:H<sub>2</sub>O with 10 mM ammonium acetate) of **123**

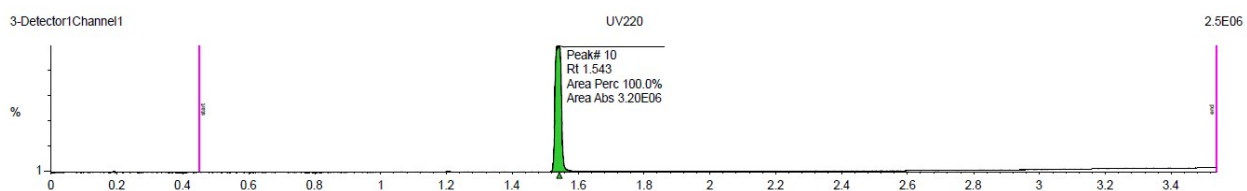

LC-MS (Injection 2: MeCN:H<sub>2</sub>O with 0.1% TFA) of **123**

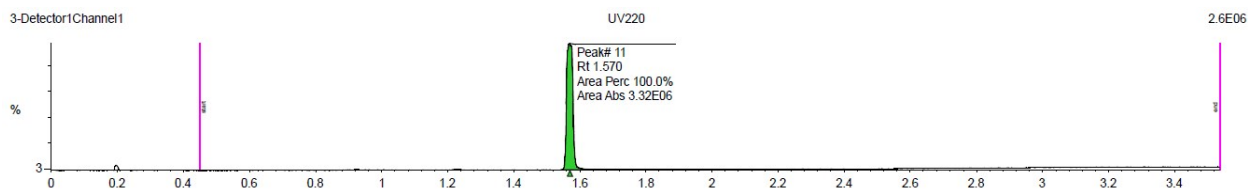



<sup>1</sup>H NMR (DMSO-*d*<sub>6</sub>, 500 MHz) of **124**

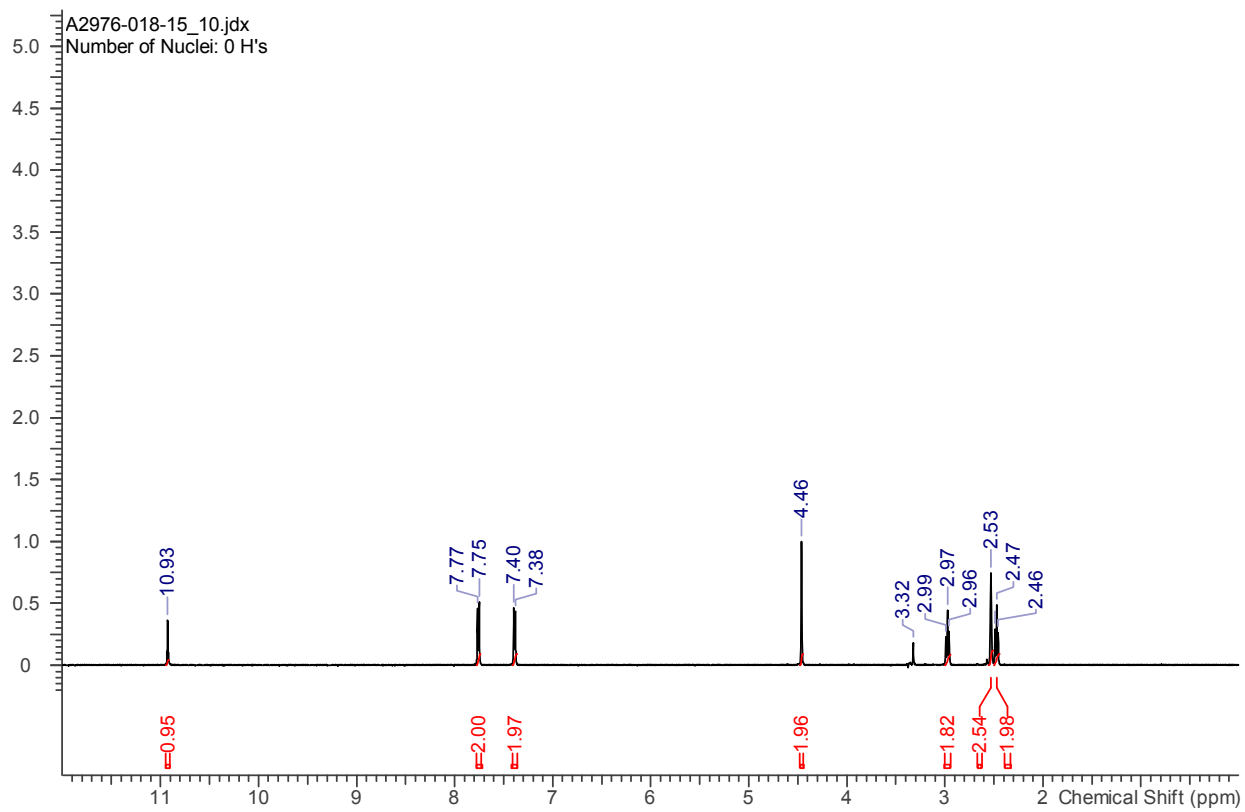

LC-MS (Injection 1: MeCN:H<sub>2</sub>O with 10 mM ammonium acetate) of **124**

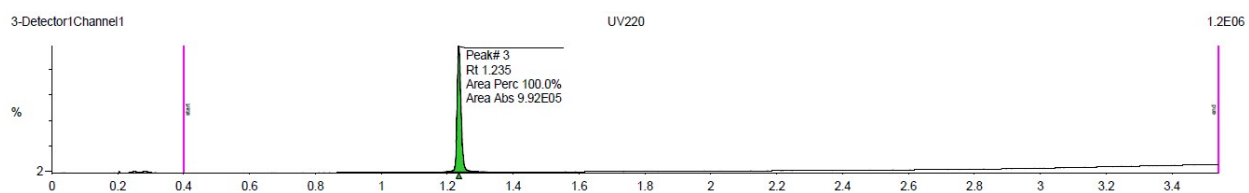

LC-MS (Injection 2: MeCN:H<sub>2</sub>O with 0.1% TFA) of **124**

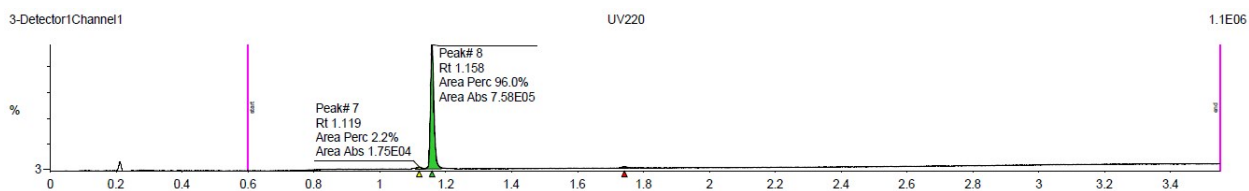

<sup>1</sup>H NMR (DMSO-*d*<sub>6</sub>, 500 MHz) of **125**

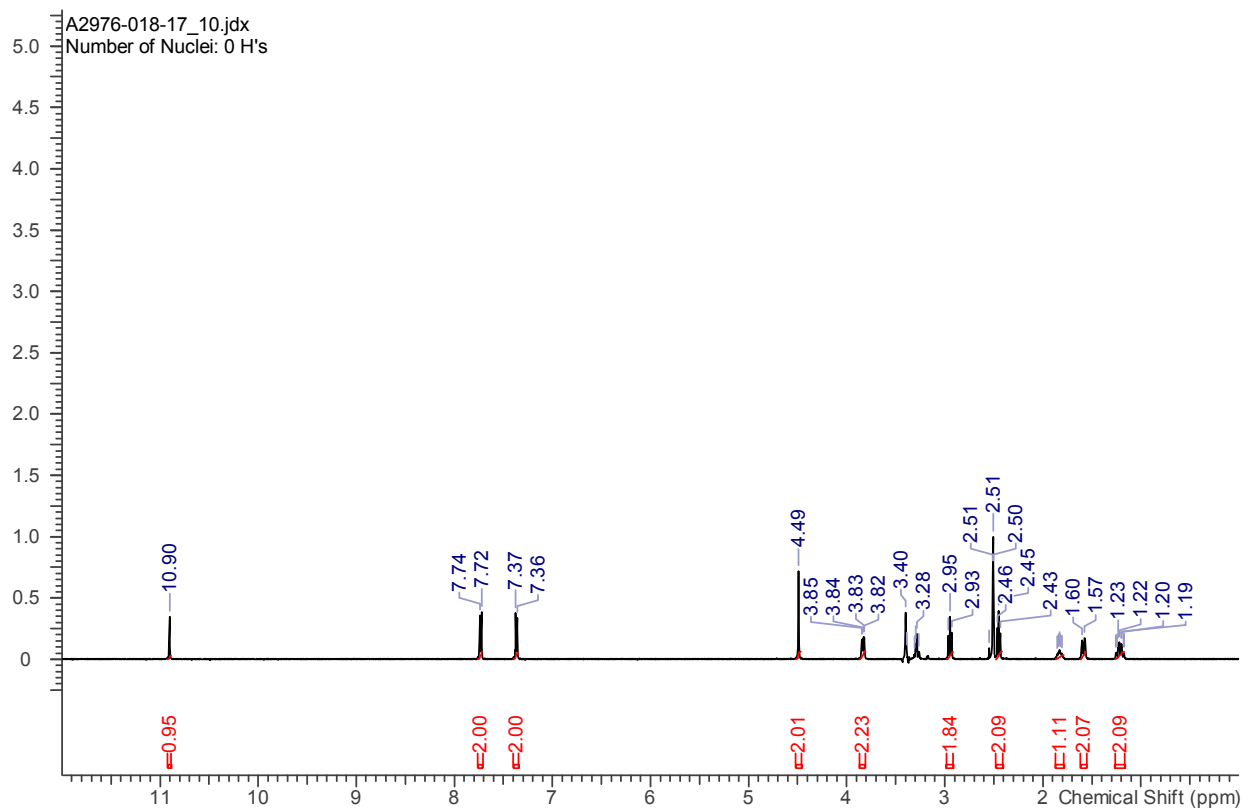

LC-MS (Injection 1: MeCN:H<sub>2</sub>O with 10 mM ammonium acetate) of **125**

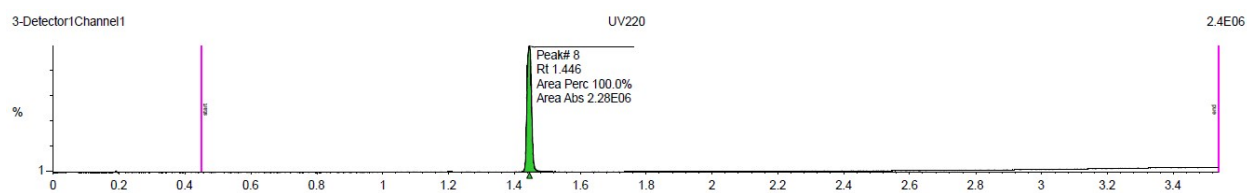

LC-MS (Injection 2: MeCN:H<sub>2</sub>O with 0.1% TFA) of **125**

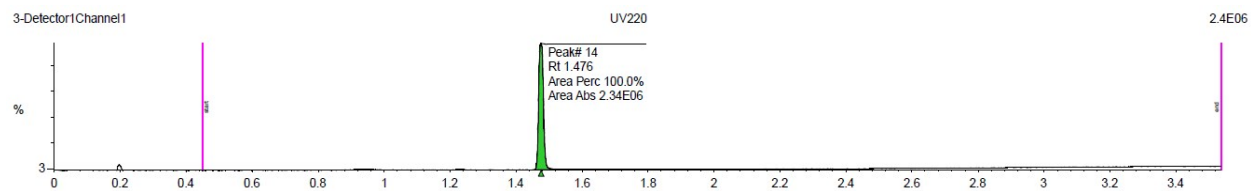

## References for the Supplemental Information

1. L. L. Anka-Lufford, K. M. Huihui, N. J. Gower, L. K. Ackerman and D. J. Weix, *Chemistry*, 2016, **22**, 11564-11567.
2. Nickel precatalyst costs are based on the cheapest listed catalog prices (on a per gram basis) from commercial vendor websites as of 5/31/2021.
3. The P/IS is intended to compare the reaction outcome within a data set, and not meant to compare across data sets.
4. In the case of Ir complexes, commercial availability was also considered when choosing photocatalysts for subsequent studies.
5. It is hypothesized in the literature (see ref. 10 in the main text) that the base is needed to sequester the BF<sub>3</sub> by-product that is generated throughout the course of the reaction, although this has not been proven experimentally.
6. A manuscript describing the capabilities of the Bristol Myers Squibb (BMS) Photoreactor is in progress.
